# Supplementary material
Source: publisher figshare collection journal article supplement (https://tandf.figshare.com/ndownloader/files/21802452)
Supplement: Supplementary file 1 [file 21802452]

**Supplementary Information**

**Novel 4-(1H-1,2,3-triazol-4-yl)methoxy)cinnolines as Potent Antibacterial agents: Synthesis and Molecular Docking Study**

Bommagani Mohan Babu, Mokenapelli Sudhakar, Boda Sathish Kumar, Chitneni Prasad Rao*

Natural Products Laboratory, Department of Chemistry, Osmania University, Hyderabad-500007, Telangana, India

**E-mail id*: prasadraoou@yahoo.com

| **Contents : pages** | |
| --- | --- |
| Experimental Procedure&Antimicrobial Activity | 2-9 |
| 1H NMR ,13C NMR&Mass spectra | 10-49 |

**Experimental**

***Instrumentation and Chemicals General experimental methods***

All chemicals used were of laboratory grade and used without further purification. Melting points of compounds were determined in open capillary tubes in a silicon oil bath using a Veego melting point apparatus and are uncorrected. The purity of compounds was monitored by TLC on silica F254 coated aluminum plates (Merck) as adsorbent and U.V. light and iodine as visualizing agents. 1H and13C NMR spectra were recorded on Varian mercury TH-300 operating at 400 MHz (1H NMR) and 101.6 MHz (13C NMR) using CDCl3 and DMSO-*d*6 as solvents and TMS as an internal standard (Chemical shift in ppm).

**Synthesis of 4-(prop-2-yn-1-yloxy)cinnoline(4a-d)**

Cinnolin-4(1H)-one (5.0 g, 34.24 mol) was added to the K2CO3 ( 7.08 g, 51.36 mol) and 3- bromoprop-1-yne (3.11 mL, 41.09 mol) in ACN (20 mL) and the mixture stirred at 80 °C for 4-8 h then reaction mixture was cool to rt. The mixture was concentrated, diluted with H2O (30 mL), and extracted with EtOAc (3 × 50 mL). The combined organic layers were dried (MgSO4), filtered and concentrated. Flash chromatography gave 4-(prop-2-yn-1-yloxy)cinnoline (**13a)**.

**Synthesis of 4-(prop-2-yn-1-yloxy)cinnoline (4a).**

Yield (2.60 g, 65.5%). m.p.100-110 °C. Colourless solid.1H NMR (400 MHz, CDCl3) *δ* 8.34 (dd, J= 1.2, 1.2 Hz, 1H, **Ar**), 7.81-7.77 (m, 2H, **Ar**), 7.60 (d, J= 8.8 Hz, 1H, **Ar**), 7.46 (t, J= 8.0 Hz,1H, **Ar**), 5.14 (d, J= 2.4 Hz, 1H, **-OCH2**), 2.51 (t, J= 2.4 Hz, 1H, **Alky**). 13C NMR (100 MHz, CDCl3) *δ* 171.2, 140.6, 140.1, 134.0, 126.0, 125.2, 124.6, 115.1, 76.0, 75.7, 46.2. ESI-MS: *m/z* 185.27 [M+H]+. Anal. Calc. (C11H8N2O) C: 71.73; H: 4.38; N: 15.21. Found C: 71.80; H: 4.04; N: 15.28%.

**Synthesis of 8-methoxy-4-(prop-2-yn-1-yloxy)cinnoline (4b)**

Yield (2.6 g, 63.23%). m.p.105-115 °C. Colourless solid.1H NMR (400 MHz, CDCl3) *δ* 7.93 (dd, *J* = 1.2, 1.2 Hz, 1H, **Ar**), 7.82 (s, 1H, Ar), 7.36 (t, *J* = 8.0 Hz, 1H, **Ar**), 7.22 (dd, *J* = 7.6, 8.0 Hz, 1H, **Ar**), 5.47 (d, *J* = 2.4 Hz, 2H, **-OCH2**), 4.02 (s, 3H, **-OCH3**) 2.41 (t, *J* = 2.4 Hz, 1H, **Alky**).13C NMR (100 MHz, CDCl3) *δ* 170.4, 148.1, 140.0, 132.5, 126.8, 125.5, 117.6, 114.9, 78.3 73.9, 56.8, 51.6. ESI-MS: *m/z* 215.42 [M+H]+. Anal. Calc. (C12H10N2O2) C: 67.28; H: 4.71; N: 13.08Found Found C: 67.36; H: 4.49; N: 13.16. %.

**Synthesis of 6-bromo-4-(prop-2-yn-1-yloxy)cinnoline (4c)**

Yield (2.80 g, 66.6%). m.p.120-130 °C colourless solid. 1H NMR (400 MHz, CDCl3) *δ* 8.36 (d, J= 2.0 Hz, 1H, **Ar**), 7.78 (dd, *J* = 8.8, 9.2 Hz, 1H, **Ar**), 7.72 (s, 1H, **Ar**), 7.42 (d, *J* = 9.2 Hz, 1H, **Ar**), 5.05 (d, *J* = 2.4 Hz, 2H, **-OCH2**), 2.45 (t, *J* = 2.4 Hz, 1H, **Alky**).13C NMR (100 MHz, CDCl3) *δ* 169.9, 140.8, 138.8, 137.1, 128.5, 125.7,119.1, 117.1, 76.1,75.6, 46.4. ESI-MS: *m/z* 263.42 [M+H]+. Anal. Calc. (C11H7BrN2O) C: 50.22; H: 2.68; N: 10.Found C: 50.35; H: 2.31; N: 10.72. 65%.

**General procedure for synthesis of azidses (6a-d and 8)**

Imidazole-1-sulfonyl azide hydrochloride (2.343 g, 11.21 mol) was added to the phenylmethanamine (1.0 g 9.345 mol), K2CO3 (2.57 g, 18.69 mol) and CuSO4.5H2O (2.5 mg, 10 µmol) in MeOH (5 mL) and the mixture stirred at room temperature for 6-16 h. Then filter through celite bed filtrate was evaporated gave the crude azide was used without purification for next step.

**Synthesis of 4-(1H-1,2,3-triazol-yl)methoxy)cinnoline conjugates (9a-o and 10a-d)**

To a 50 mL of round-bottom flask 4-(prop-2-yn-1-yloxy)cinnoline (150 mg, 0.81 mol) was added to the azidomethyl benzene (162 mg, 1.22 mol), and sodium ascorbate (807 mg, 4.07 mol) CuSO4.5H2O (405 mg, 1.63 mol) in H2O:*t-*BuOH (1:1) and the mixture stirred at room temperature for 6-16 h then diluted with H2O (10 mL), and extracted with DCM (3 × 10 mL). The combined organic layers were dried (MgSO4), filtered and concentrated. Flash chromatography gave 120 mg of 4-((1-benzyl-1H-1,2,3-triazol-4-yl)methoxy)cinnoline Scheme-3 **(18a)**

**Synthesis of 4-((1-benzyl-1H-1,2,3-triazol-4-yl)methoxy)cinnoline (9a)**

Yield (46.5%), m.p.120-130 °C. Brown solid.1H NMR (400 MHz, CDCl3) *δ* 8.24 (s, 1H, **Ar**), 8.11 (d, *J* = 8.0 Hz, 1H, **Ar**), 7.96 (d, *J* = 8.8 Hz, 1H, **Ar**), 7.83 (d, *J* = 7.2 Hz, 2H, **Ar**), 7.49 (t, *J* = 7.6 Hz, 1H, **Ar**), 7.33 (t, *J* = 7.2 Hz, 3H, **Ar**), 7.26 (d, *J* = 6.8 Hz, 2H, **Ar**), 5.76 (s, 2H, -**OCH2**), 5.55 (s, 2H, **-NCH2**).13C NMR (100 MHz, CDCl3) *δ* 171.1, 142.7, 140.5, 140.4, 134.1, 134.0, 129.2, 128.9, 128.1, 125.7, 125.1, 124.6, 122.5, 115.6, 54.4, 51.6. ESI-MS: *m/z* 318.0 [M+H]+. Anal. Calcd for (C18H15N5O). C: 68.13; H: 4.76; N: 22.07. Found. C: 68.20; H: 4.41; N: 22.20%.

**4-((1-benzyl-1H-1,2,3-triazol-4-yl)methoxy)cinnoline (9b)**

Yield (57.6%), m.p.135-145 °C. Brown solid.1H NMR (400 MHz, CDCl3) *δ* 7.99 (dd, *J* = 8.0, 8.0 Hz, 1H, **Ar**), 7.84 (s, 1H, **Ar**), 7.33 (d, *J* = 6.4 Hz, 4H, **Ar**), 7.23 (s, 1H, **Ar**), 7.21-7.13 (m, 2H, **Ar**), 7.11 (d, *J* = 1.2 Hz, 1H, **Ar**), 6.04 (s, 2H, **-OCH2**), 5.45 (s, 2H, **-NCH2**).13C NMR (100 MHz, CDCl3) *δ* 170.2, 148.0, 145.1, 140.0, 134.4, 132.9, 129.0, 128.7, 126.9, 125.4, 121.7, 117.4, 11.6, 56.6, 56.3, 54.1. ESI-MS: *m/z* 348.0 [M+H]+. Anal. Calc. (C19H17N5O2) C: 65.69; H: 4.93; N: 20.16. Found. C: 65.71; H: 4.62; N: 20.21%.

**4-((1-benzyl-1H-1,2,3-triazol-4-yl)methoxy)-6-bromocinnoline (9c)**

Yield (63.8%), m.p.125-135 °C. Brown solid.1H NMR (400 MHz, CDCl3) *δ* 8.24 (s, 1H, **Ar**), 7.80 (d, *J* = 4.4 Hz, 3H, **Ar**), 7.44 (s, 1H, **Ar**), 7.36 (t, *J* = 3.6 Hz, 3H, **Ar**), 7.23 (d, *J* = 3.6 Hz, 2H, **Ar**), 5.62 (s, 2H, **-OCH2**), 5.47 (s, 2H, **-NCH2**).13C NMR (100 MHz, CDCl3) *δ* 169.8, 142.3, 140.7, 139.2, 137.2, 133.9, 129.2, 129.0, 128.2, 128.1, 125.7, 122.6, 119.1, 117.8, 54.4, 51.8. ESI-MS: *m/z* 397.0 [M+H]+. Anal. Calc. (C18H14BrN5O). C: 54.56; H: 3.56; N: 17.67. Found: C:54.61; H: 3.20; N: 17.75%.

**4-(1-(4-methoxybenzyl)-1H-1,2,3-triazol-4-yl)methoxy)cinnoline (9d)**

Yield (53.1%). m.p.140-150°C.Brown solid.1H NMR (400 MHz, CDCl3) *δ* 8.29 (dd, *J* = 8.0, 8.0 Hz, 1H, **Ar**), 7.84 (d, *J* = 8.8 Hz, 1H, **Ar**), 7.80 (s, 1H, **Ar**), 7.74-7.70 (m, 1H, **Ar**), 7.41 (d, J= 8.0 Hz, 2H, **Ar**),7.18 (dd, *J* = 6.4, 6.4 Hz, 2H, **Ar**), 6.86 (dd, *J* = 6.4, 6.8 Hz, 2H, **Ar**), 5.65 (s, 2H, **-OCH2**), 5.40 (s, 2H, **-NCH2**), 3.79(s, 3H, **-OCH3**). 13C NMR (100 MHz, CDCl3) *δ* 171.1, 160.5, 142.6, 140.5, 140.4, 134.1, 129.7, 125.9, 125.7, 125.1, 124.6, 122.2, 115.2, 114.5, 55.3, 53.9, 51.6. ESI-MS: *m/z* 348.0 [M+H]+. Anal. Calc. (C19H17N5O2) C: 65.69; H: 4.93; N: 20.16. Found. C: 65.72; H: 4.61; N: 20.23%.

**8-methoxy-4-((1-(4-methoxybenzyl)-1H-1,2,3-triazol-4-yl)methoxy)cinnoline (9e)**

Yield (64.3%), m.p.120-130 °C. Brown solid, 1H NMR (400 MHz, CDCl3) *δ* 7.83 (dd, *J* = 8.0, 8.4 Hz, 1H, Ar), 7.27 (s, 1H, Ar), 7.24 (d, *J* = 8.0 Hz, 1H, Ar), 7.13 (s, 1H, Ar), 7.10-7.04 (m, 3H, Ar), 6.79 (t, *J* = 2.0 Hz, 2H, Ar), 5.96 (s, 2H, -OCH2), 5.30 (s, 2H, -NCH2), 3.83 (s, 3H, -OCH3), 3.72 (s, 3H, -OCH3). 13C NMR (100 MHz, CDCl3) *δ* 170.3, 159.9, 148.0, 145.0, 140.0, 132.9, 129.5, 126.9, 126.3, 120.4, 121.4, 117.4, 114.6, 114.4, 56.6, 56.3, 55.3, 53.7. ESI-MS: *m/z* 378.0 [M+H]+. Anal. Calc. (C20H19N5O3) C: 63.65; H: 5.07; N: 18.56. Found. C: 63.70; H: 4.82; N: 18.61%.

**6-bromo-4-((1-(4-methoxybenzyl)-1H-1,2,3-triazol-4-yl)methoxy)cinnoline (9f)**

Yield (65.5%), m.p.185-195 °C. Brown solid, 1H NMR (400 MHz, CDCl3) *δ* 8.41 (d, *J* = 4.4 Hz, 1H, Ar), 7.95 (t, *J* = 5.6 Hz, 3H, Ar), 7.40 (s, 1H, Ar), 7.19 (d, *J* = 6.8 Hz, 2H, Ar), 6.88 (d, J= 6.8 Hz, 2H, Ar), 5.61 (s, 2H, -OCH2), 5.40 (s, 2H, -NCH2), 3.80 (s, 3H, -OCH3). 13C NMR (100 MHz, CDCl3) *δ* 169.8, 160.0, 142.2, 140.6, 139.2, 137.2, 129.8, 128.2, 125.8, 125.7, 122.3, 119.1, 117.8, 114.5, 55.3, 54.0, 51.8. ESI-MS:*m/z* 426.0 [M+H]+. Anal. Calc. (C19H16BrN5O2) C: 53.54; H: 3.78; N: 16.43. Found. C: 53.62; H: 3.60; N: 16.61%.

**5-fluoro-4-((1-(4-methoxybenzyl)-1H-1,2,3-triazol-4-yl)methoxy)cinnoline (9g)**

Yield (44.2%), m.p.160-170 °C. Brown solid, 1H NMR (400 MHz, CDCl3) *δ* 7.63 (s, 1H, Ar), 7.56 (d, *J* = 6.8 Hz, 2H, Ar), 7.33(s, 1H, Ar), 7.12 (d, J= 8.8 Hz, 2H, Ar), 6.95-6.91 (m, 1H, Ar), 6.81 (d, *J* = 6.8 Hz, 2H, Ar), 5.52 (s, 2H, -OCH2), 5.34 (s, 2H, -NCH2), 3.73 (s, 3H, -OCH3).13C NMR (100 MHz, CDCl3) *δ* 169.5, 62.3, 160.0, 142.3, 141.8, 134.6, 134.5, 129.8, 125.8, 114.5, 111.4, 111.3, 110.9, 110.7, 55.3, 53.9, 52.2. ESI-MS: *m/z* 366.0 [M+H]+.Anal. Calc. (C19H16FN5O2) C: 62.46; H: 4.41; N: 19.17; Found C: 62.51; H: 4.10; N: 19.21%.

**4-((1-(4-(trifluoromethyl)benzyl)-1H-1,2,3-triazol-4-yl)methoxy)cinnoline (9h)**

Yield (57.5%), m.p.175-185 °C. Brown solid.1H NMR (400 MHz, CDCl3) *δ* 8.23 (dd, *J* = 8.0, 8.0 Hz, 1H, Ar), 7.74 (t, *J* = 10.8 Hz, 2H, Ar), 7.68-7.64 (m, 1H, Ar), 7.55 (d, *J* = 8.0 Hz, 2H, Ar), 7.41 (s, 1H, Ar), 7.37 (t, *J* = 7.6 Hz, 1H, Ar), 7.27 (d, *J* = 8.0 Hz, 2H, Ar), 5.61 (s, 2H, -OCH2), 5.47 (s, 2H, -NCH2). 13C NMR (100 MHz, CDCl3) *δ* 171.1, 143.1, 140.5, 138.0, 134.2, 128.3, 126.2, 126.2, 126.1, 126.1, 125.8, 125.2, 124.6, 122.7, 115.5, 53.6, 51.5. ESI-MS: *m/z* 386.0 [M+H]+. Anal. Calc. (C19H14F3N5O) C: 59.22; H: 3.66; N: 18.17. Found. C: 59.31; H: 3.29; N: 18.21%.

**8-methoxy-4-((1-(4-(trifluoromethyl)benzyl)-1H-1,2,3-triazol-4-yl)methoxy)cinnoline (9i)**

Yield (68.9%), m.p.160-170 °C. Brown Solid, 1H NMR (400 MHz, CDCl3) *δ* 7.84 (dd, *J* = 8.0, 8.0 Hz, 1H, Ar), 7.78 (s, 1H, Ar), 7.53 (d, *J* = 8.0 Hz, 2H, Ar), 7.28-7.22 (m, 4H, Ar), 7.07 (t, *J* = 6.8 Hz, 1H, Ar), 5.99 (s, 2H, -OCH2), 5.45 (s, 2H, -NCH2), 3.85 (s, 3H, -OCH3). 13C NMR (100 MHz, CDCl3) *δ* 171.3, 148.0, 140.5, 140.1, 138.4, 132.9, 128.9, 126.1, 126.1, 126.0, 125.5, 121.9, 117.5, 114.6, 56.5, 56.4, 53.5. ESI-MS: *m/z* 416.0 [M+H]+.Anal. Calc. (C20H16F3N5O2) C: 57.83; H: 3.88; N: 16.86. Found. C: 57.88; H: 3.42; N: 16.91%.

**6-bromo-4-((1-(4-(trifluoromethyl)benzyl)-1H-1,2,3-triazol-4-**

**yl)methoxy)cinnoline (18j)**

Yield (67.6%), m.p.185-195 °C. Brown solid.1H NMR (400 MHz, CDCl3) *δ* 8.35 (d, *J* = 8.0 Hz, 1H, Ar), 7.73 (d, *J* = 8.8 Hz, 3H, Ar), 7.56 (d, *J* = 8.0 Hz, 2H, Ar), 7.43 (s, 1H, Ar), 7.28 (d, *J* = 8.0Hz, 2H, Ar), 5.57 (s, 2H, -OCH2), 5.47 (s, 2H, -NCH2).13C NM, R (100 MHz, CDCl3) *δ* 169.8, 142.6, 140.7, 139.2, 137.8, 137.2, 128.3, 128.2, 127.5, 126.2, 126.2, 125.7, 122.7, 119.2, 117.6, 53.7, 51.6. ESI-MS:*m/z* 464.0 [M+H]+. Anal. Calc. (C19H13BrF3N5O) C: 49.16; H: 2.82; N, 15.09. Found. C: 49.21; H: 2.60; N: 15.12%.

**5-fluoro-4-((1-(4-(trifluoromethyl)benzyl)-1H-1,2,3-triazol-4-**

**yl)methoxy)cinnoline (9k)**

Yield (40.1%), m.p.180-190 °C. Brown solid.1H NMR (400 MHz, CDCl3) *δ* 7.64 (s, 1H, Ar), 7.61-7.53 (m, 4H, Ar), 7.44 (s, 1H, Ar), 7.28 (d, *J* = 8.0 Hz, 2H, Ar), 6.96-6.92 (m, 1H, Ar), 5.55 (s, 2H, -OCH2), 5.48 (s, 2H, -NCH2). 13C NMR (100 MHz, CDCl3) *δ* 169.5, 162.3, 142.7, 141.9, 138.0, 134.6, 134.5, 128.3, 126.2, 126.1, 122.8, 111.2, 111.2, 110.9, 110.7, 53.7, 52.0. ESI-MS: *m/z* 404.0 [M+H]+. Anal. Calc. (C19H13F4N5O). C: 56.58; H: 3.25; N: 17.36; O: 3.97. Found. C: 56.61; H: 2.80; N: 17.39%.

**4-((1-(2-(trifluoromethyl)benzyl)-1H-1,2,3-triazol-4-yl)methoxy)cinnoline (9l)**

Yield (54.3%), m.p.175-185 °C. Brown solid.1H NMR (400 MHz, CDCl3) *δ* 8.22 (d, *J* = 8.1 Hz, 1H, Ar), 7.75 (d, *J* = 7.2 Hz, 2H, Ar), 7.66 (t, *J* = 8.1 Hz, 1H, Ar), 7.55 (d, *J* = 7.8 Hz, 1H, Ar), 7.43 (d, *J* = 9.6 Hz, 3H, Ar), 7.34 (t, *J* = 7.2 Hz, 2H, Ar), 5.62 (s, 2H, -OCH2), 5.46 (s, 2H, -NCH2). 13C NMR (100 MHz, CDCl3) *δ* 171.1, 143.1, 140.5, 135.1, 134.2, 131.7, 131.3, 129.8, 125.8, 125.2, 124.7, 124.7, 124.6, 122.6, 115.5, 53.7, 51.5. ESI-MS: *m/z* 386.0 [M+H]+. Anal. Calc.(C19H14F3N5O) C: 59.22; H: 3.66; N, 18.17. Found. C: 59.30; H: 3.41; N: 18.20%.

**8-methoxy-4-((1-(2-(trifluoromethyl)benzyl)-1H-1,2,3-triazol-4- yl)methoxy)cinnoline (9m)**

Yield (65.5%), m.p.140-150 °C. Brown solid.1H NMR (400 MHz, CDCl3) *δ* 7.84 (dd, *J* = 8.4, 8.0 Hz, 1H, Ar), 7.78 (s, 1H, Ar), 7.53 (d, *J* = 7.6 Hz, 1H, Ar), 7.41 (t, *J* = 8.0 Hz, 1H, Ar), 7.36 (s, 1H, Ar), 7.31 (d, *J* = 7.6 Hz, 1H, Ar), 7.24 (d, *J* = 16.0 Hz, 2H, Ar) , 7.06 (dd, *J* = 8.0, 8.0 Hz, 1H, Ar), 5.99 (s, 2H, -OCH2), 5.45 (s, 2H, -NCH2), 3.83 (s, 3H, -OCH3).13C NMR (100 MHz, CDCl3) *δ* 170.2, 147.9, 145.5, 140.0, 135.6, 132.8, 131.2, 131.1, 129.7, 126.8, 125.6, 125.4, 124.5, 121.9, 117.4, 114.6, 56.6, 56.3, 53.4. ESI-MS: *m/z* 416.0 [M+H]+. Anal. Calc. (C20H16F3N5O2). C: 57.83; H: 3.88; N: 16.86. Found C: 57.91; H: 3.60; N: 16.89%.

**6-bromo-4-((1-(3-(trifluoromethyl)benzyl)-1H-1,2,3-triazol-4-yl)methoxy)cinnoline (9n)**

Yield (60.1%), m.p.135-145 °C. Brown solid.1H NMR (400 MHz, CDCl3) δ 8.35 (s, 1H, Ar), 7.73 (d, *J* = 9.3Hz, 3H, Ar), 7.56 (d, *J* = 7.8 Hz, 1H, Ar), 7.43 (t, *J* = 7.2 Hz, 3H, Ar), 7.34 (d, *J* = 7.5 Hz, 1H, Ar), 5.58 (s, 2H, -OCH2), 5.47 (s, 2H, -NCH2).13C NMR (100 MHz, CDCl3) *δ* 169.8, 142.7, 140.7, 139.2, 137.2, 135.0, 131.3, 129.8, 128.3, 125.9, 125.9, 125.7, 124.7, 122.7, 119.1, 117.6, 53.7, 51.7. ESI-MS: *m/z* 464.0 [M+H]+. Anal. Calc. (C19H13BrF3N5O) C: 49.16; H: 2.82; N: 15.09. Found. C: 49.21; H, 2.53; N: 15.12%.

**5-fluoro-4-((1-(3-(trifluoromethyl)benzyl)-1H-1,2,3-triazol-4-**

**yl)methoxy)cinnoline (9o)**

Yield (43.4%), m.p.160-170 °C. Brown solid.1H NMR (400 MHz, CDCl3) *δ* 7.64 (s, 1H, Ar), 7.60-7.51 (m, 3H, Ar), 7.43 (t, *J* = 7.2 Hz, 3H, Ar), 7.35 (d, *J* = 8.0 Hz, 1H, Ar), 6.96-6.91 (m, 1H, Ar), 5.56 (s, 2H, -OCH2), 5.48 (s, 2H, -NCH2).13C NMR (100 MHz, CDCl3) *δ* 169.4, 162.2, 142.7, 141.8, 135.2, 134.6, 131.3, 129.8, 125.8, 124.7, 122.9, 114.7, 111.3, 111.3, 110.9, 110.7, 53.6, 52.1. ESI-MS: *m/z* 404.0 [M+H]+.Anal. Calc. (C19H13F4N5O). C: 56.58; H: 3.25; N: 17.36. Found.C: 56.61; **H**: 2.80; N: 17.42%.

**4-(3-(4-((cinnolin-4-yloxy)methyl)-1H-1,2,3-triazol-1-yl)propyl)morpholine (10a)**

Yield (41.6%), m.p.150-160 °C. Brown solid, 1H NMR (400 MHz, CDCl3) *δ* 8.30 (dd, *J* = 8.4, 8.0 Hz, 1H, Ar), 7.84 (t, *J* = 2.0 Hz, 2H, Ar), 7.75-7.71 (m,1H, Ar), 7.51 (s, 1H, Ar), 7.44-7.40 (m, 1H, Ar), 5.70 (s, 2H, -OCH2), 4.39 (t, *J* = 6.8 Hz, 2H, -CH2), 3.63 (t, *J* = 4.4 Hz, 4H, morp), 2.31 (t, *J* = 4.4 Hz, 4H, morp), 2.24 (t, *J* = 6.8 Hz, 2H, -CH2), 2.04 (q, *J* = 6.8 Hz, 2H, -CH2-CH2-). 13C NMR (100 MHz, CDCl3) *δ* 171.0, 142.1, 140.5, 140.4, 134.2, 125.7, 125.2, 124.6, 123.0, 115.6, 66.8, 54.7, 53.4, 51.7, 48.2, 26.7. ESI-MS: *m/z* 355.0 [M+H]+. Anal. Calc. (C18H22N6O2). C: 61.00; H: 6.26; N: 23.71. Found. C: 61.10; H: 5.81; N: 23.79%.

**4-(3-(4-(((8-methoxycinnolin-4-yl)oxy)methyl)-1H-1,2,3-triazol-1- yl)propyl)morpholine (10b)**

Yield (44.3%), m.p.155-165 °C. Red solid, 1H NMR (400 MHz, CDCl3) *δ* 7.92 (dd, *J* = 8.4, 8.0 Hz, 1H, Ar), 7.87 (s, 1H, Ar), 7.34 (t, *J* = 8.0 Hz, 2H, Ar), 7.15 (dd, *J* = 8.0, 8.0 Hz, 1H, Ar), 6.08 (s, 2H, -OCH2), 4.36 (t, *J* = 6.8 Hz, 2H, -CH2-), 3.95 (s, 3H, -OCH3), 3.63 (t, *J* = 4.4 Hz, 4H, morp), 2.31 (t, *J* = 4.4 Hz, 4H, morp), 2.23 (t, *J* = 6.8 Hz, 2H, -CH2- ), 2.04 (q, *J* = 12.8 Hz, 2H, -CH2-CH2-).13C NMR (100 MHz, CDCl3) *δ* 171.0, 148.0, 144.3, 139.8, 132.7, 126.7, 125.4, 122.2, 117.2, 114.6, 66.7, 56.6, 56.4, 54.7, 53.3, 47.9, 26.7. ESI-MS: *m/z* 386.0 [M+H]+. Anal. Calc. (C19H24N6O3).C: 59.36; H: 6.29; N: 21.86. Found. C: 59.52; H: 6.02; N: 21.93%.

**4-(3-(4-(((6-bromocinnolin-4-yl)oxy)methyl)-1H-1,2,3-triazol-1- yl)propyl)morpholine (10c)**

Yield (44.1%), m.p.150-160 °C. Brown Solid, 1H NMR (400 MHz, CDCl3) *δ* 8.43 (t, *J* =1.2Hz, 1H, Ar ), 7.84 (s, 1H, Ar), 7.79 (d, *J* = 1.2 Hz, 2H, Ar), 7.53 (s, 1H, Ar), 5.66 (s, 2H, -OCH2), 4.39 (t, *J* = 7.2 Hz, 2H, -CH2 ), 3.65 (t, *J* = 4.4 Hz, 4H, morp ), 2.34 (t, *J* = 4.0 Hz, 4H, morp ), 2.26 (t, *J* = 6.8 Hz, 2H, -CH2-CH2-), 2.03 (t, *J* = 6.8 Hz,
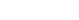

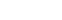

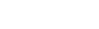

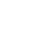

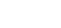

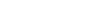

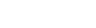
 2H, -CH2-CH2-). 13C NMR (100 MHz, CDCl3) *δ* 169.6, 141.7, 140.5, 139.2, 137.1, 128.0, 125.6, 123.1, 119.0, 117.8, 66.7, 54.8, 53.4, 51.7, 48.3, 26.7. ESI-MS: *m/z* 385.0 [M+H]+. Anal. Calc. (C18H21BrN6O2). C: 49.89; H: 4.88; N: 19.40. Found C: 49.92; H: 4.50; N: 19.42%.

**4-(3-(4-(((5-fluorocinnolin-4-yl)oxy)methyl)-1H-1,2,3-triazol-1-**

**yl)propyl)morpholine (10d)**

Yield (38.9%), m.p.160-170 °C. Red solid, 1H NMR (400 MHz, CDCl3) *δ* 7.63 (s, 1H, Ar), 7.56-7.53 (m, 3H, Ar), 6.94-6.89 (m, 1H, Ar), 5.57 (s, 2H, Ar), 4.33 (t, *J* = 6.8 Hz, 2H, Ar), 3.57 (t, *J* = 4.4 Hz, 4H, morp), 2.27 (t, *J* = 4.0 Hz, 4H, morp), 2.20 (t, *J* = 6.8 Hz, 2H, -CH2-CH2-), 1.98 (q, *J* = 6.8 Hz, 2H, -CH2-CH2-).13C NMR (100 MHz, CDCl3) *δ* 169.4, 162.3, 159.6, 141.8, 134.6, 123.0, 114.8, 111.3, 111.3, 110.8, 110.6, 66.8, 54.8, 53.4, 52.1, 48.3, 26.7, ESI-MS: *m/z* 432.0 [*M* + H]
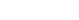

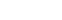

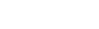

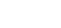

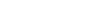

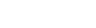
. 13C NMR (100 MHz, CDCl3) *δ* 169.6, 141.7, 140.5, 139.2, 137.1, 128.0, 125.6, 123.1, 119.0, 117.8, 66.7, 54.8, 53.4, 51.7, 48.3, 26.7. ESI-MS: *m/z* 385.0 [M+H]+. Anal. Calc. (C18H21FN6O2). C: 58.05; H: 5.68; N: 22.57. Found C: 58.10; H: 5.46; N: 22.51%.

**Antimicrobial Activity by Paper Disc method**

**Media Preparation:**

**LB Broth:** NaCl: 10 gr /Lit

Tryptone: 10 gr/lit

Yeast Extract: 5gr/lit

Autoclave at 121 0c and 15 lb Pressure

**LB agar:** NaCl: 10 gr /Lit

Tryptone: 10 gr/lit

Yeast Extract: 5gr/lit

Agar Agar: 15 gr /lit

The above constituents were weighed and dissolved in water. The mixture was warmed on water bath till agar dissolved. This was then sterilized in an autoclave at 15 lbs pressure and 121 0C for fifteen minutes. The sterilized medium (20 ml) was poured in sterilized Petri dishes under aseptic condition, allowing them to solidify on a plane table.

**Bacterial Strains:**

**Inoculum’s preparation**

The inoculum was standardized at 1* 106 CFU/ml comparing with turbidity standard (0.5 MacFarland tube)

*Pseudomonas aeruginosa* (gram-negative) MTCC – 424

*Escherichia coli* (*E. coli*) (gram-negative) MTCC – 443

*Bacillus subtilis* (Gram-positive)

*Staphylococcus aureus* (gram-positive) MTCC – 96

**Swabs preparation**

A supply of cotton wool swabs on wooden applicator sticks was prepared. They were sterilized in tins, culture tubes, or on paper, either in the autoclave or by dry heat.

**5 mm disks were prepared by using wt men filter paper and autoclaved**

**Methodology:**

Inoculation of *Pseudomonas aeruginosa* ([gram-negative](https://en.wikipedia.org/wiki/Gram-negative_bacteria)), *Escherichia coli* (*E. coli*) ([gram-negative](https://en.wikipedia.org/wiki/Gram-negative)), *Bacillus subtilis* ([Gram-positive](https://en.wikipedia.org/wiki/Gram-positive)), *Staphylococcus aureus* ([gram-positive](https://en.wikipedia.org/wiki/Gram-positive) ) all microbes obtain from Microbial Type Culture Collection –MTCC In auto calved LB broth media and Incubate over night at 37º C in shaker for Bacterial growth. From that 0.3ml of bacterial culture was taken and inoculated by using spreader on freshly prepared auto calved agar plates i.e Petri dishes. After drying of plate 5 mm sample disc which are dissolved in DMSO solvent were kept onmicrobial plate along with positive controls NX(Norfloxacin) for *Staphylococcus, Pseudomonas* and OF (ofloxacin) for *Bacillus* and *E.coli*.Incubation over night at 37º C in BOD incubator. After overnight incubation zone of inhibition is measured by measuring scale

| Compound | Gram-Positive bacteria | | Gram-Negative bacteria | |
| --- | --- | --- | --- | --- |
| *Bacillus*  *subtilis* | *Pseudomonas*  *aeruginosa* | *Staphylococcus*  *aureus* | *Escherichia*  *coli* |
| **9a** | - | - | - | - |
| **9b** | - | - | - | - |
| **9c** | - | - | - | - |
| **9d** | 4.1 | 4.5 | 3.8 | 4.2 |
| **9e** | - | - | - | - |
| **9f** | - | - | - | - |
| **9g** | 3.1 | - | - | 4.0 |
| **9h** | - | - | - | - |
| **9i** | - | - | - | - |
| **9j** | - | - | - | - |
| **9k** | 3.0 | 3.0 | - | - |
| **9l** | - | - | - | - |
| **9m** | - | - | - | - |
| **9n** | 3.0 | - | - | - |
| **9o** | - | - | - | - |
| **10a** | 3.5 | 4.2 | 4.0 | 3.7 |
| **10b** | 5.2 | 5.5 | 5.6 | 4.8 |
| **10c** | 4.0 | 4.6 | 3.1 | 3.8 |
| **10d** | 3.9 | 3.5 | - | - |
| **Norfloxacin** | 6.1 | 6 | 6.4 | 7 |
| *a*Zone of inhibition (mm) 10 µg/mL concentrations | | | | |

**Table S1.**Anti-bacterial activity of compounds **9a-o** and **10a-d**.*a*


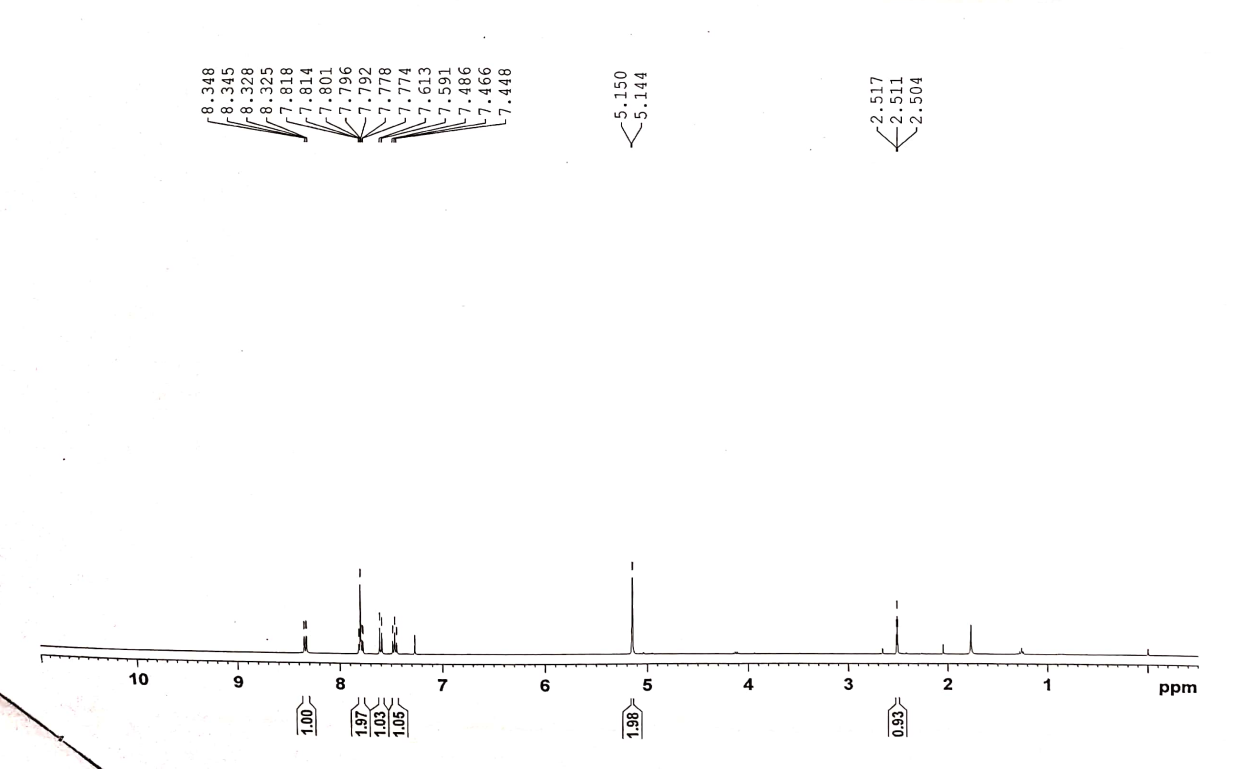


**Figure S2:** 1H-NMR spectrum of compound **4a**


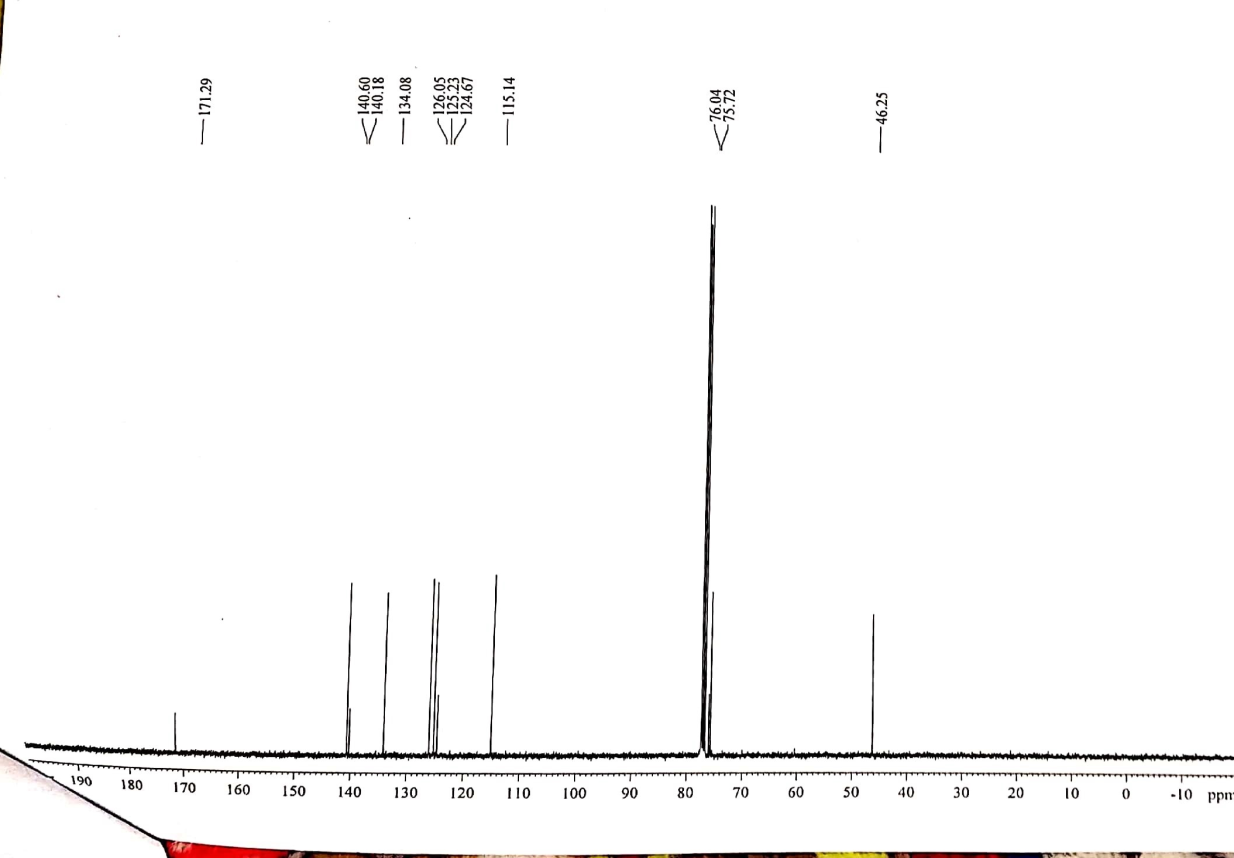


**Figure S3:** 13C- NMR spectrum of compound **4a**


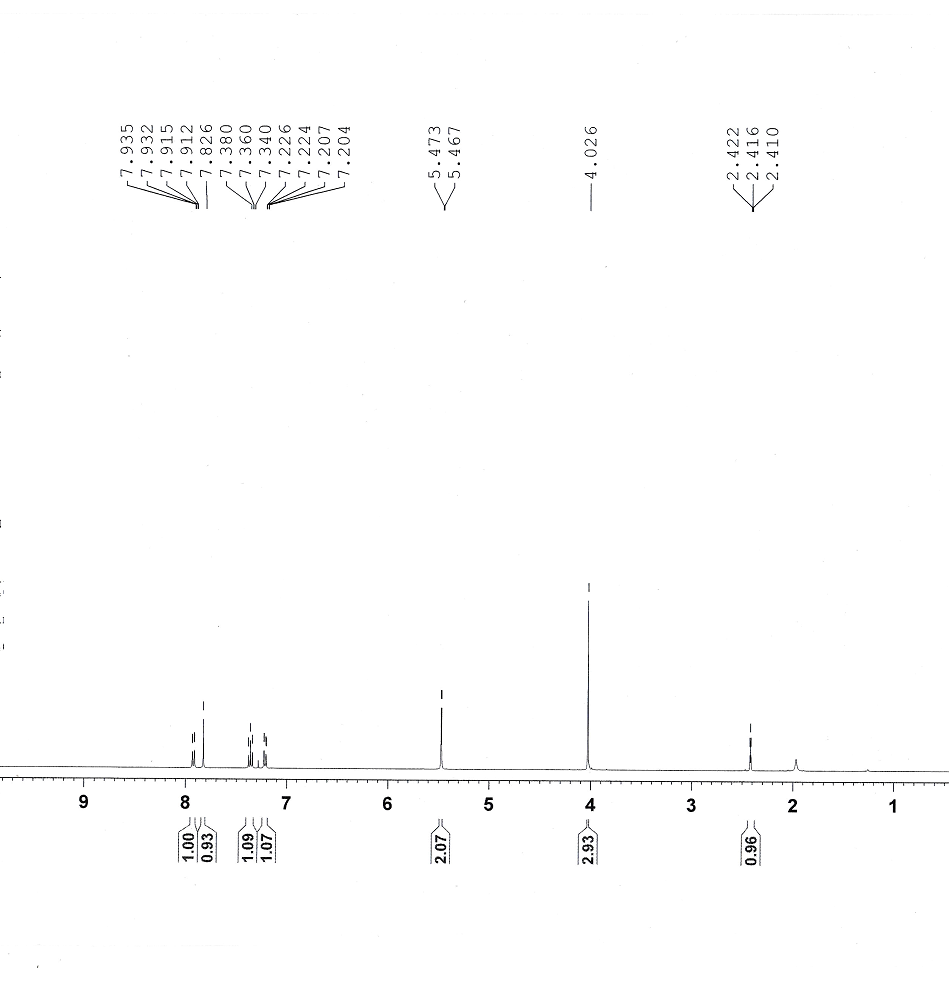
 **Figure S4:** 13C- NMR spectrum of compound **4b**


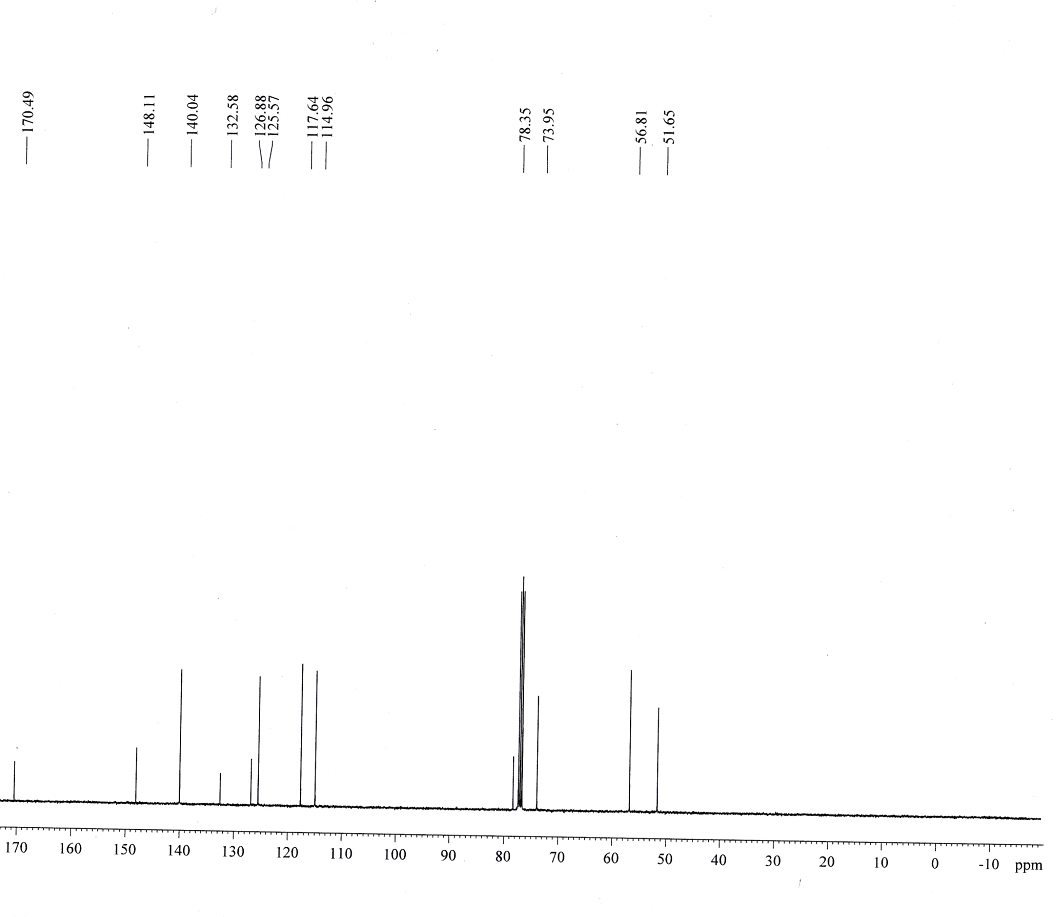


**Figure S5:** 13C- NMR spectrum of compound **4b**


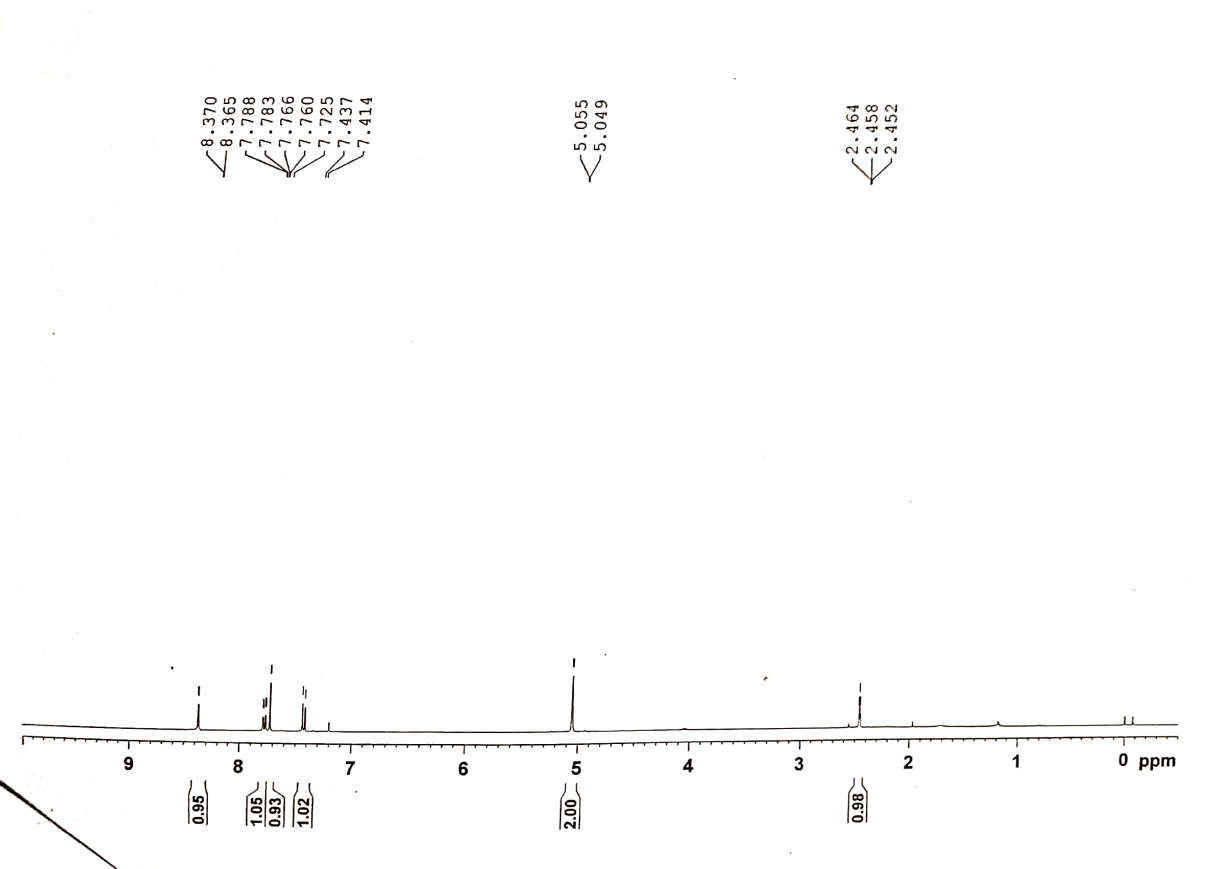
 **Figure S6:** 1H-NMR spectrum of compound **4c**


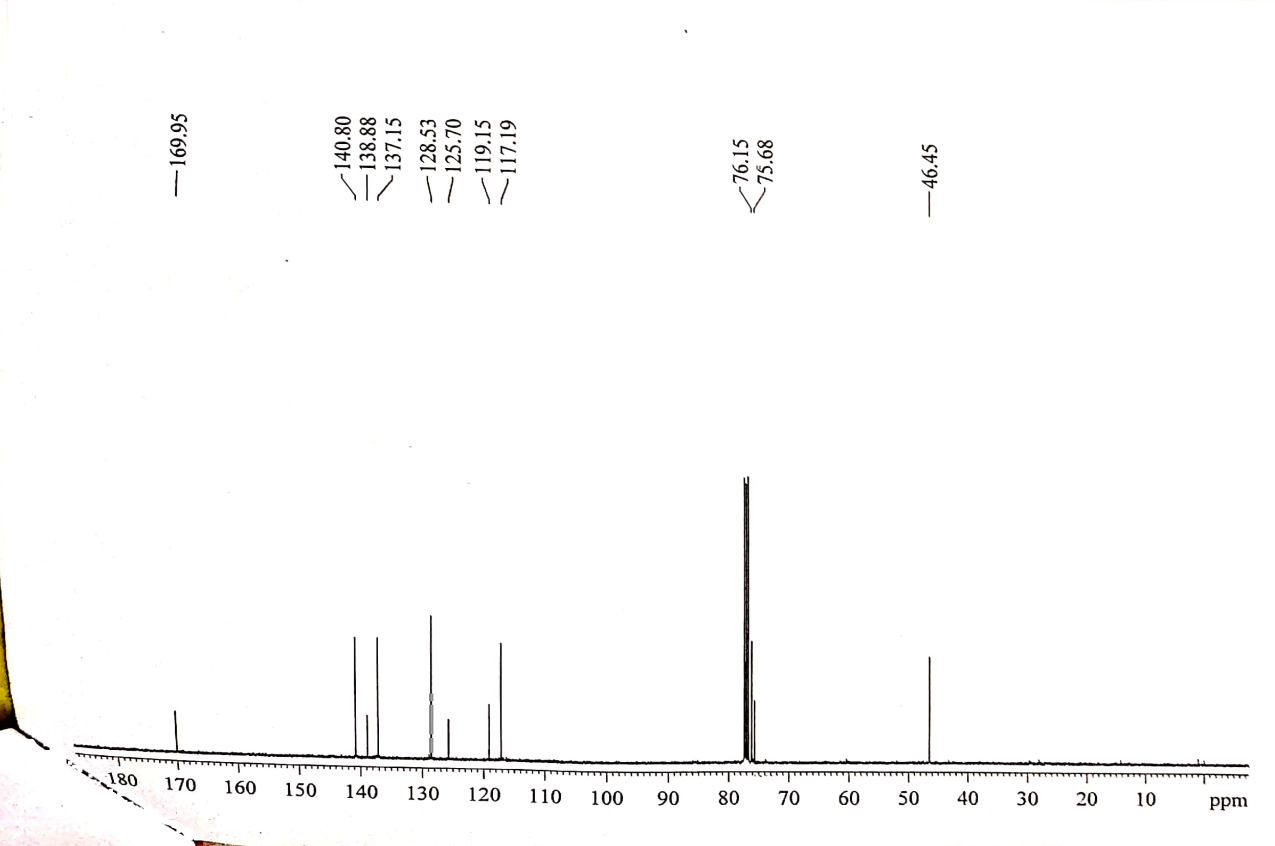


**Figure S7:** 13C- NMR spectrum of compound **4c**


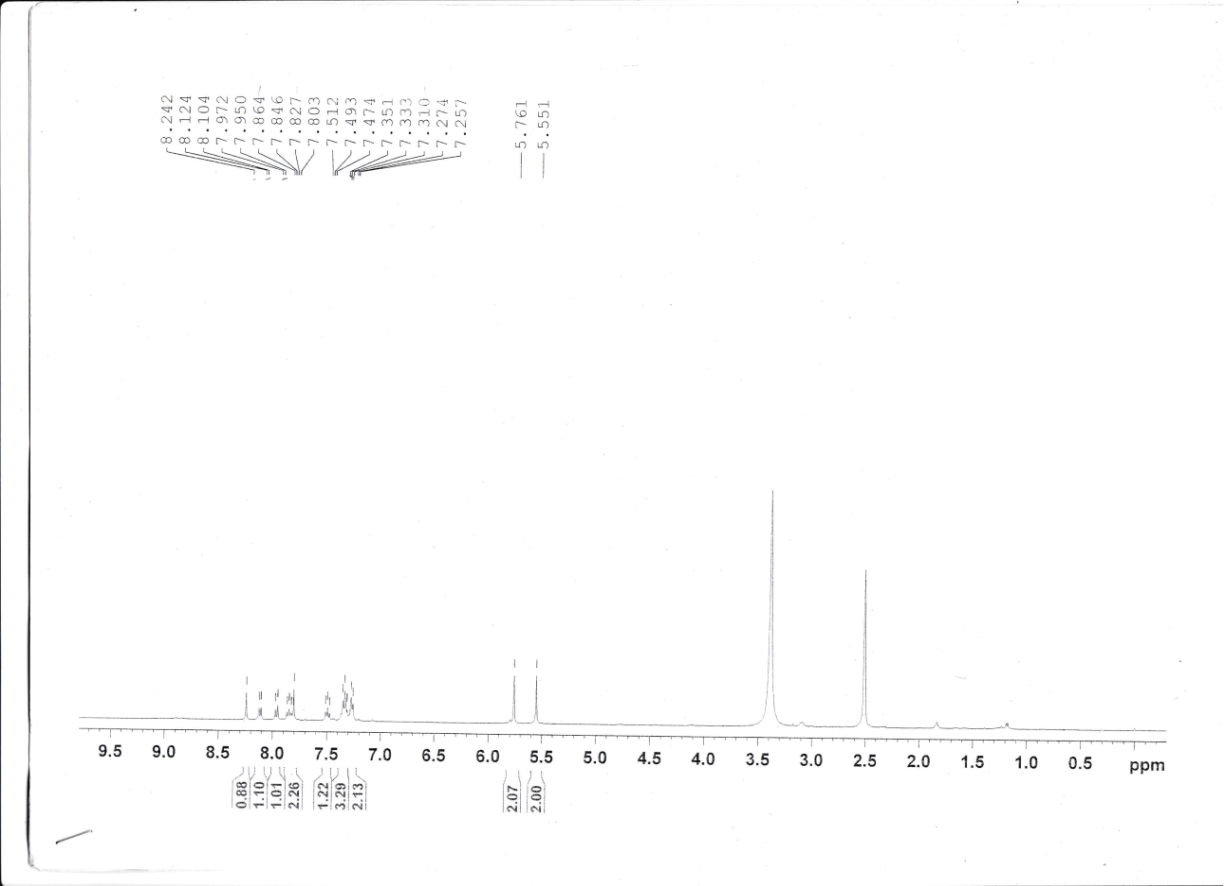


**Figure S8:** 1H-NMR spectrum of compound **9a**


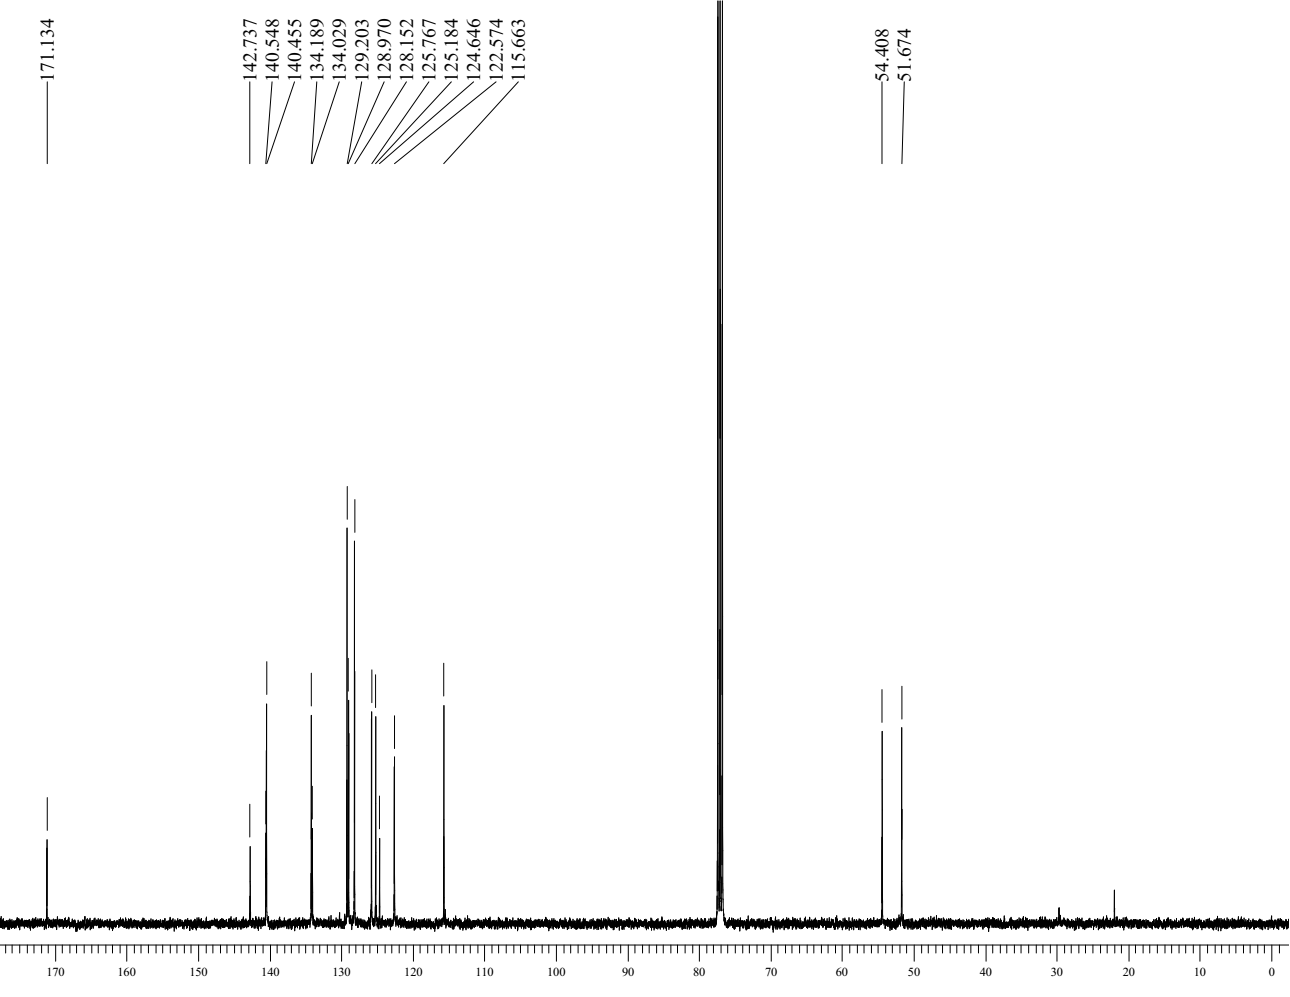


**Figure S9:** 13C- NMR spectrum of compound **9a**

**
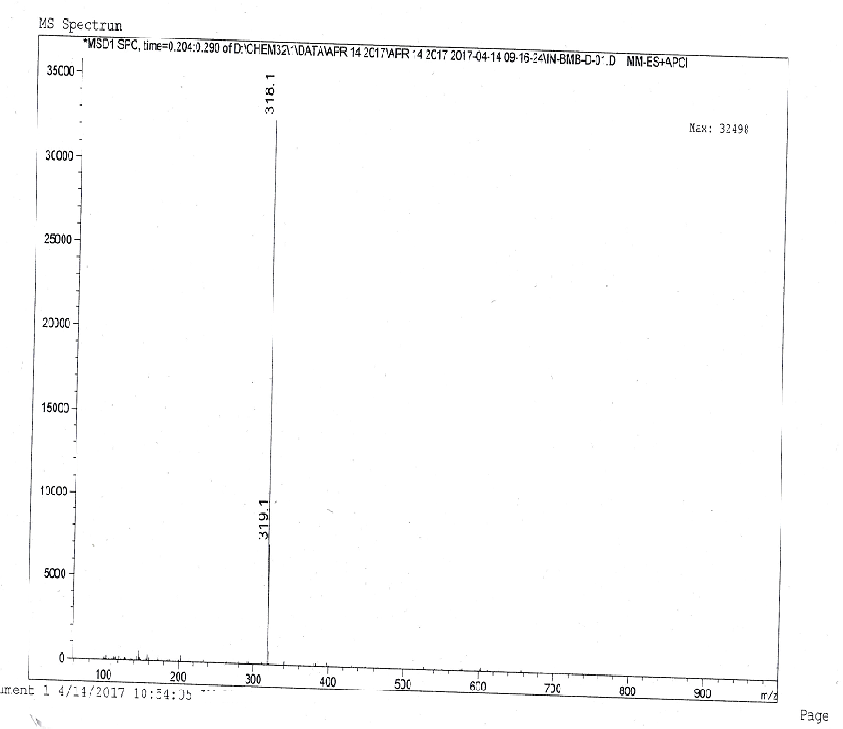
**

**Figure S10:** ESI Mass spectrum of compound **9a**


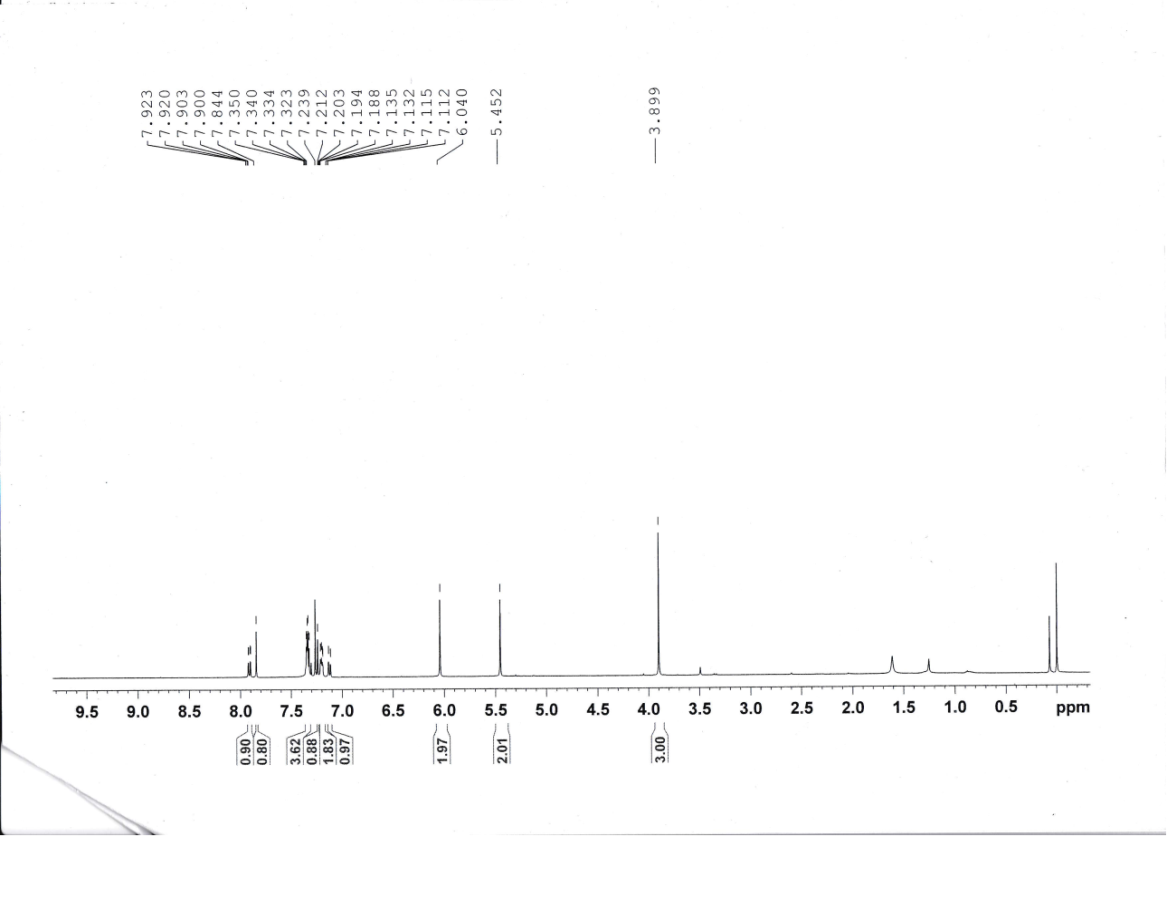


**Figure S11:** 1H-NMR spectrum of compound **9b**


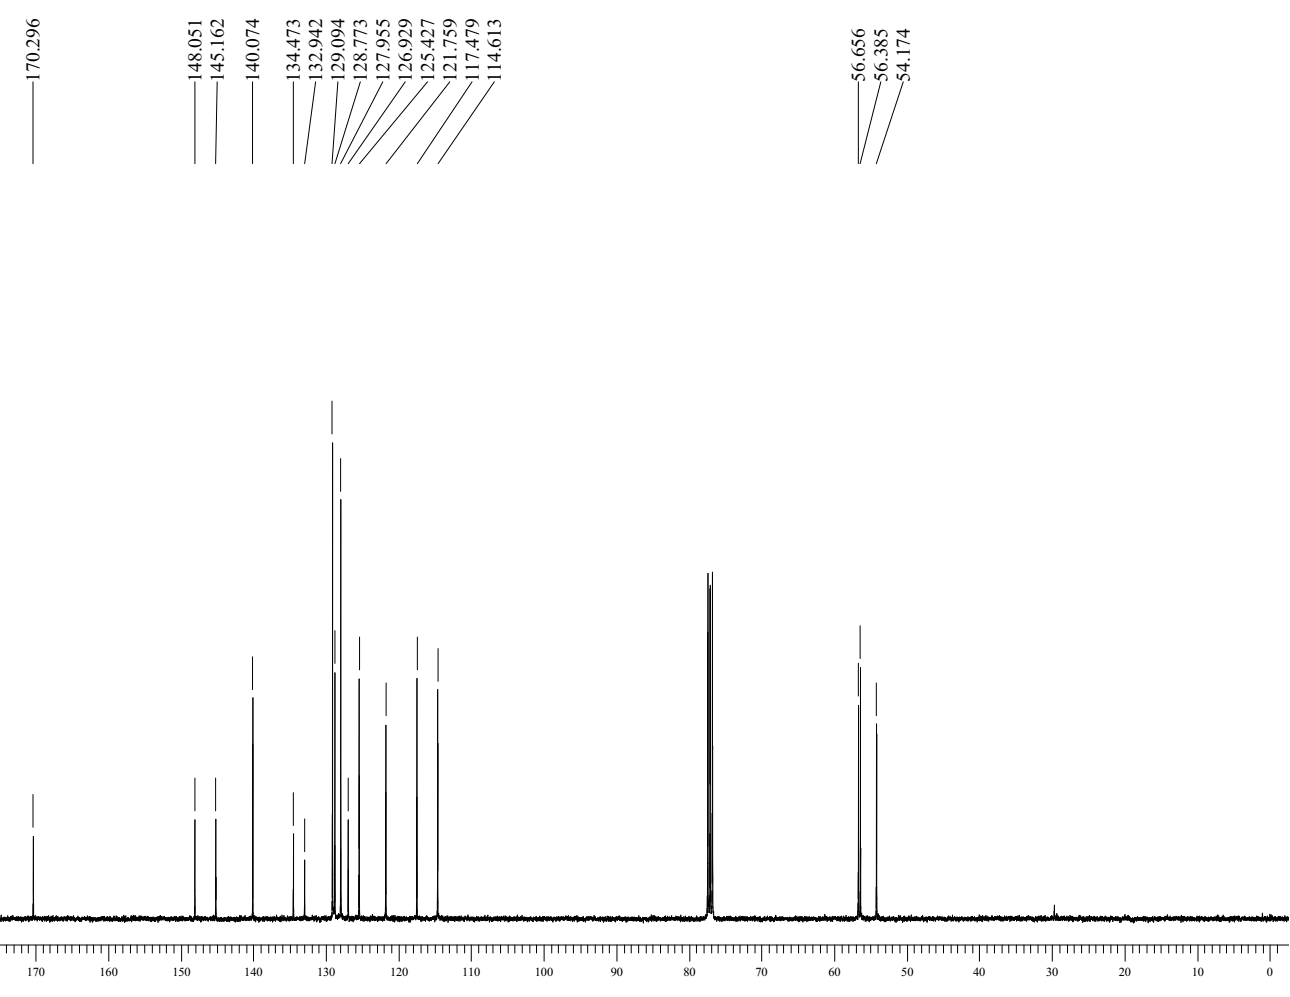


**Figure S12:** 13C- NMR spectrum of compound **9b**

**
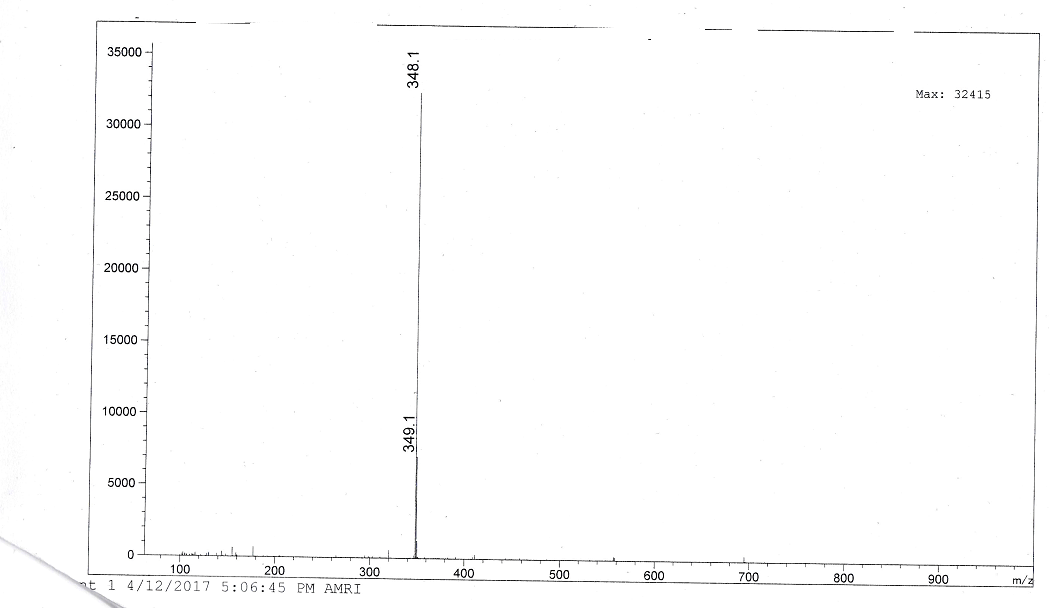
**

**Figure S13:** ESI Mass spectrum of compound **9b**

**
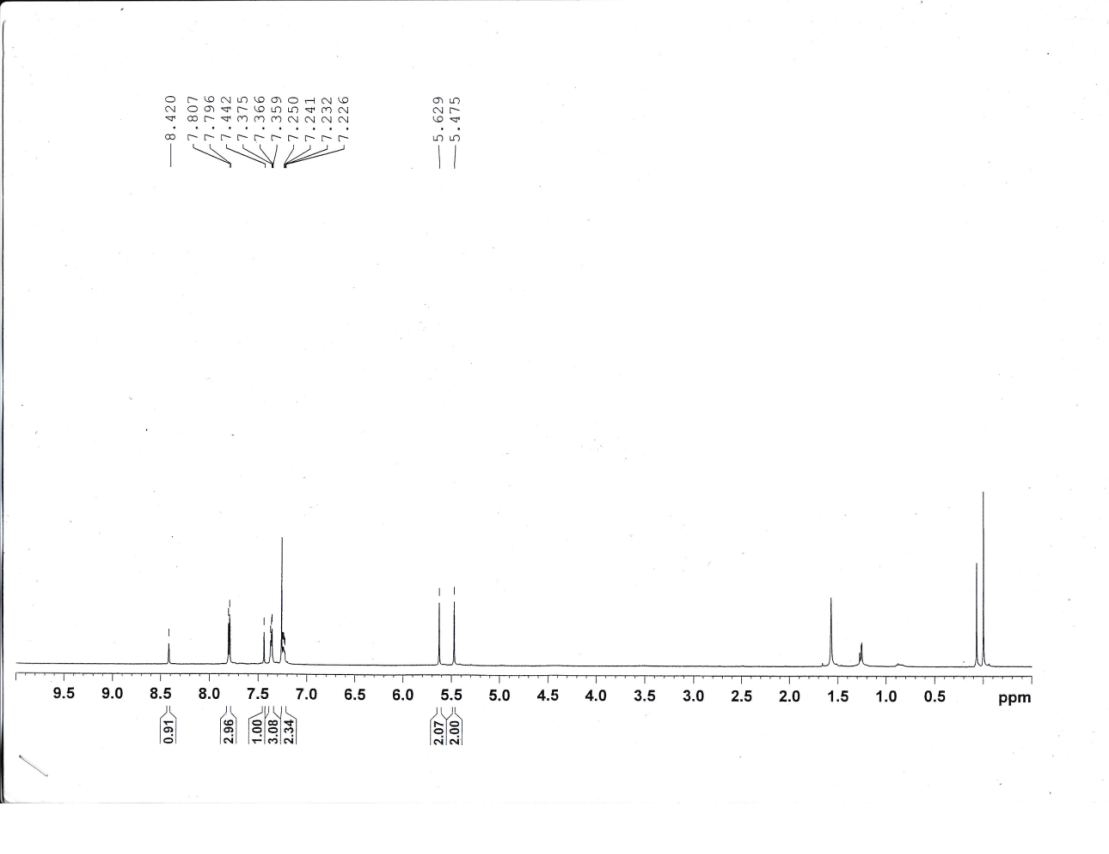
**

**Figure S14:** 1H-NMR spectrum of compound **9c**

**
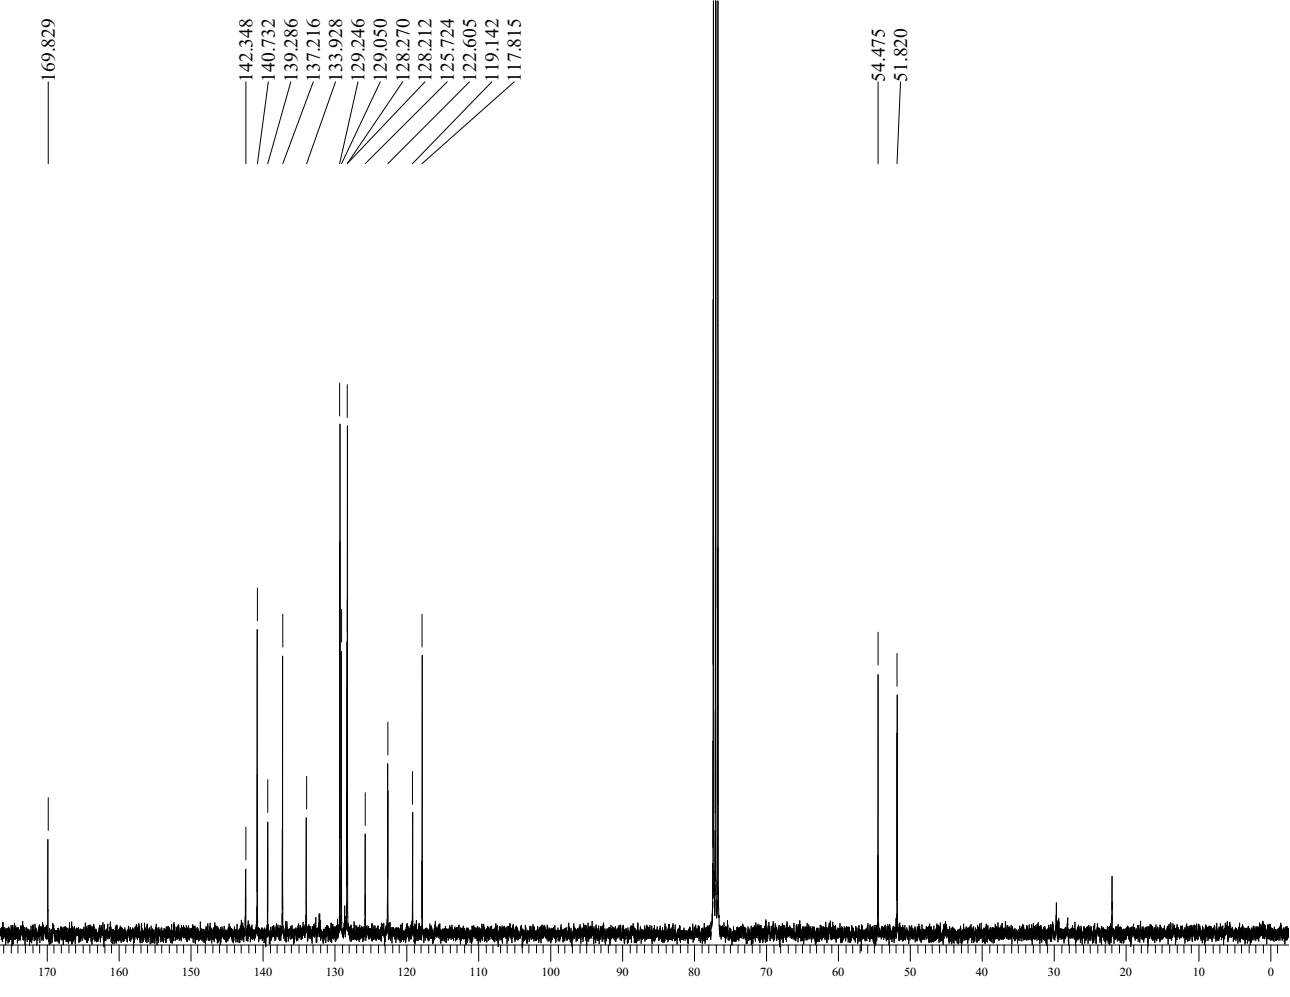
**

**Figure S15:** 13C- NMR spectrum of compound **9c**

**
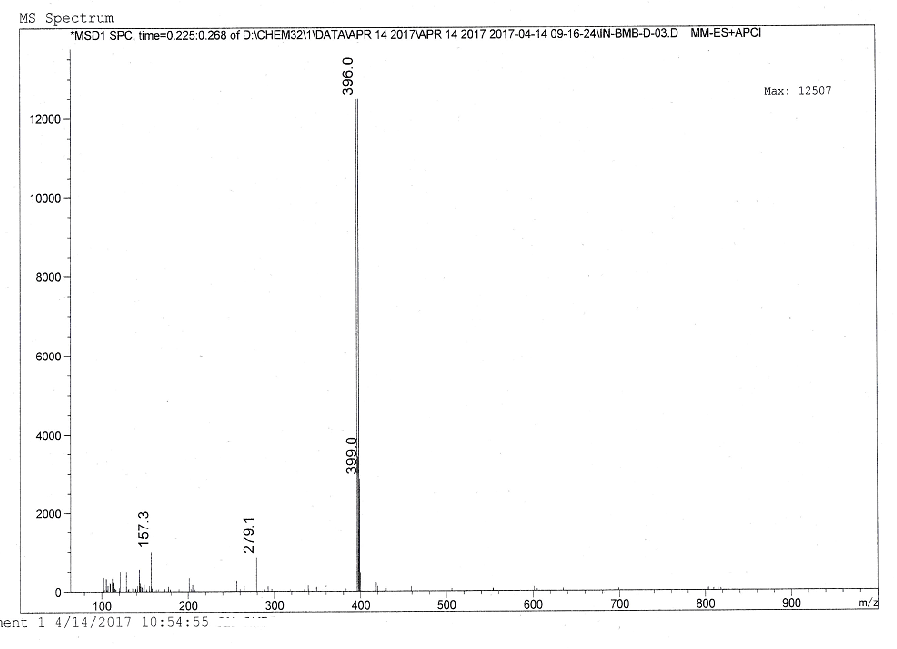
**

**Figure S16:** ESI Mass spectrum of compound **9c**


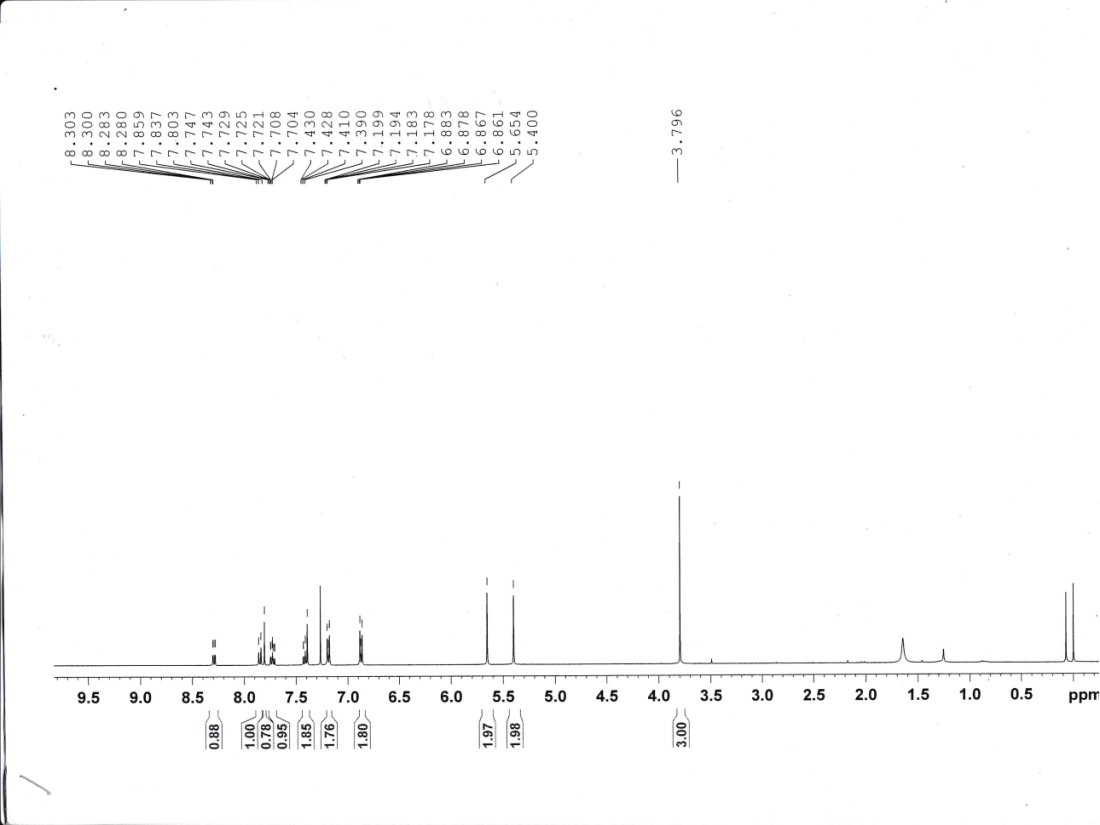


**Figure S17:** 1H-NMR spectrum of compound **9d**

**
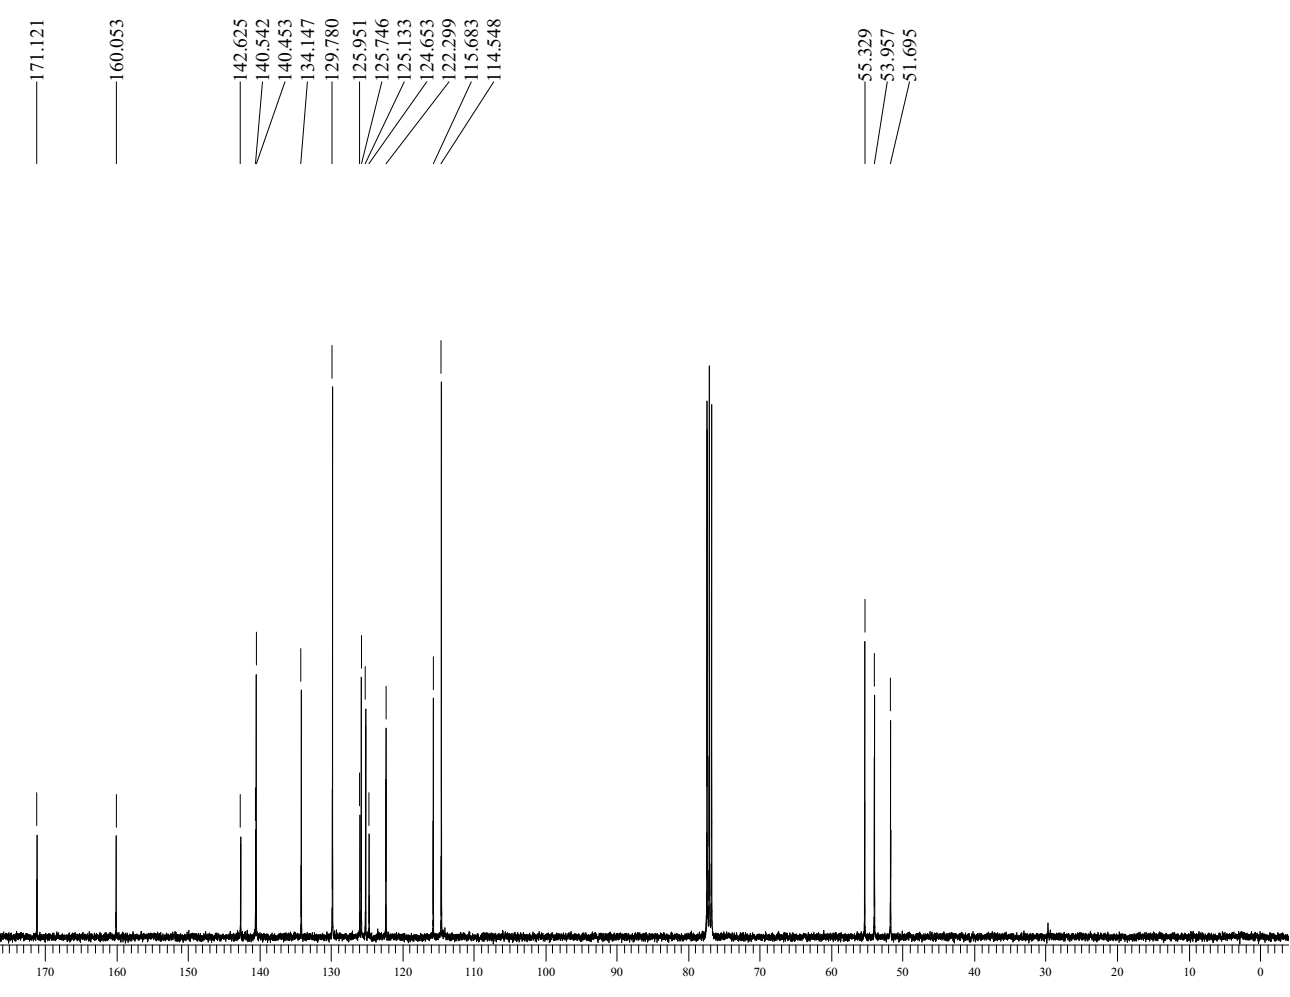
**

**Figure S18:** 13C- NMR spectrum of compound **9d**

**
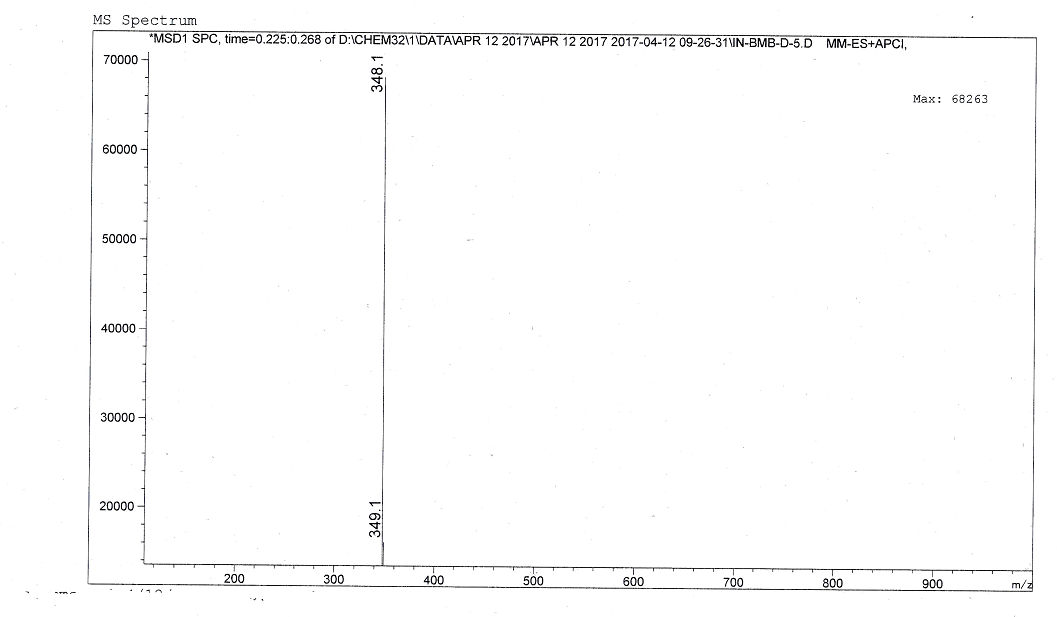
**

**Figure S19:** ESI Mass spectrum of compound **9d**


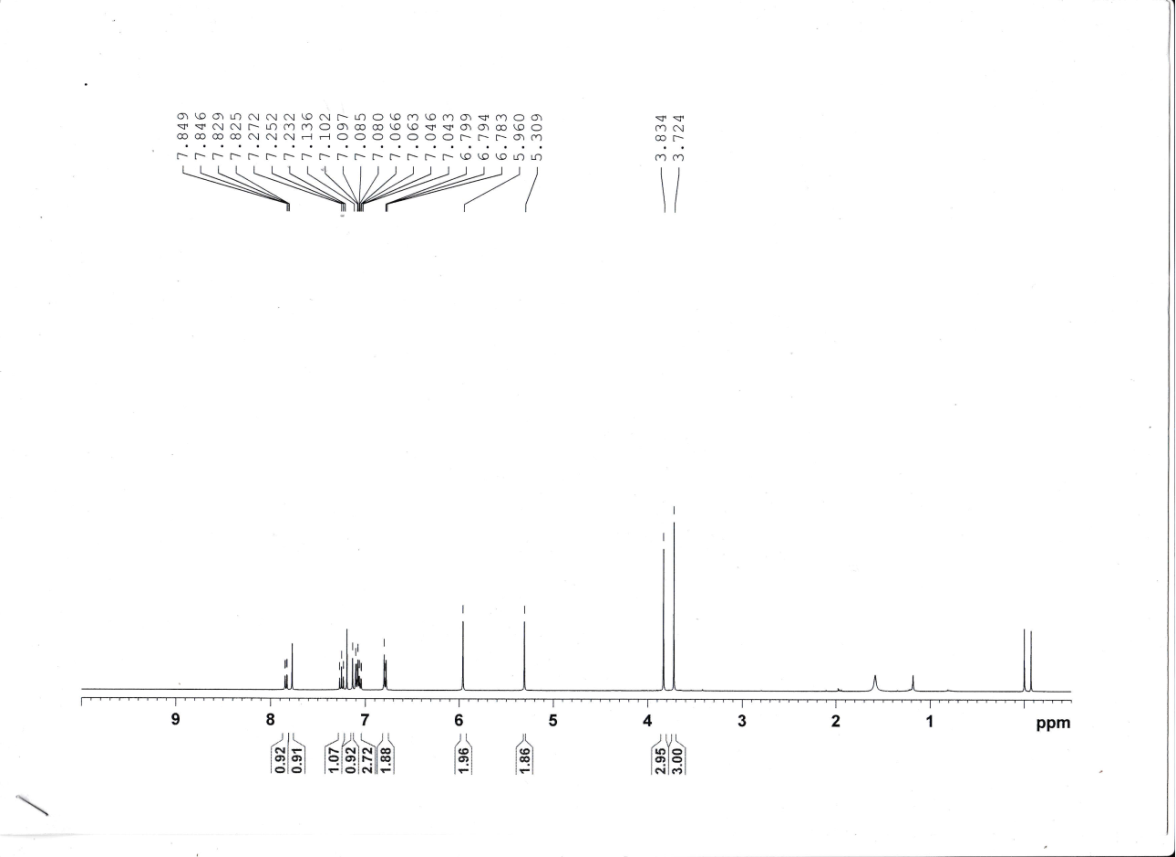


**Figure S20:** 1H-NMR spectrum of compound **9e**

**
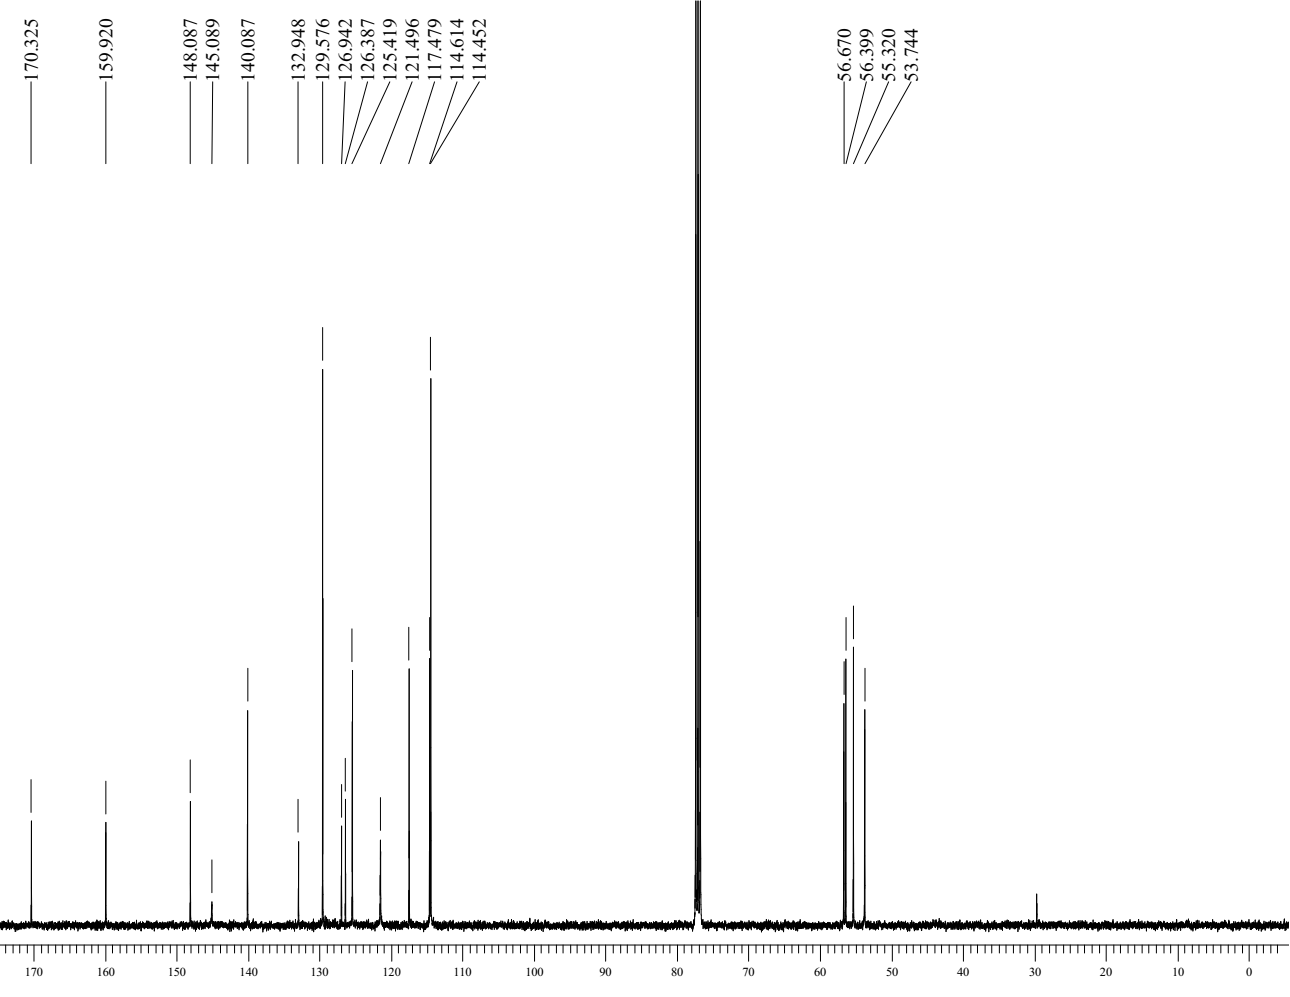
**

**Figure S21:** 13C- NMR spectrum of compound **9e**

**
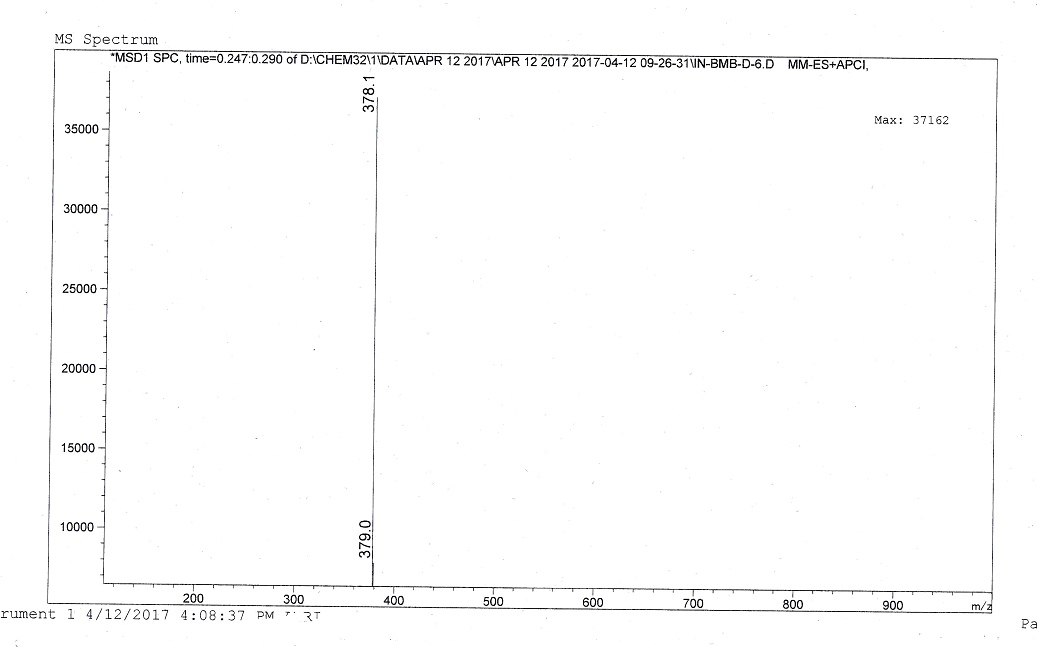
**

**Figure S22:** ESI Mass spectrum of compound **9e**


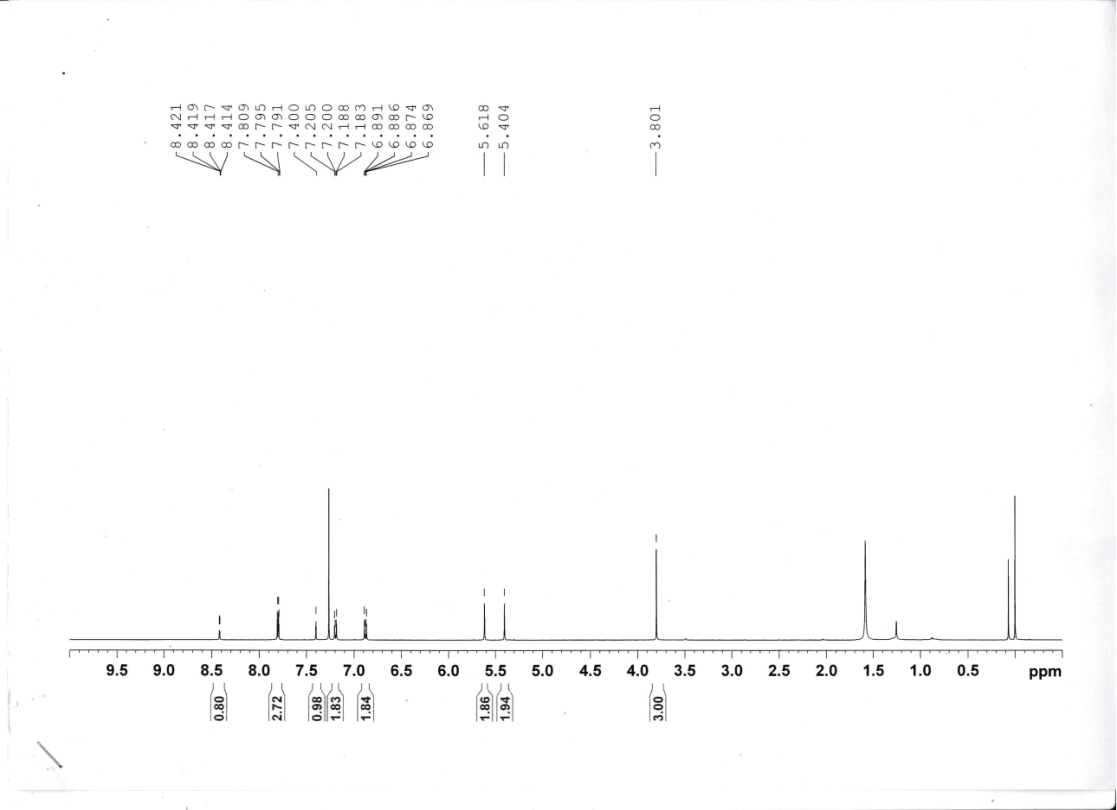


**Figure S23:** 1H-NMR spectrum of compound **9f**

**
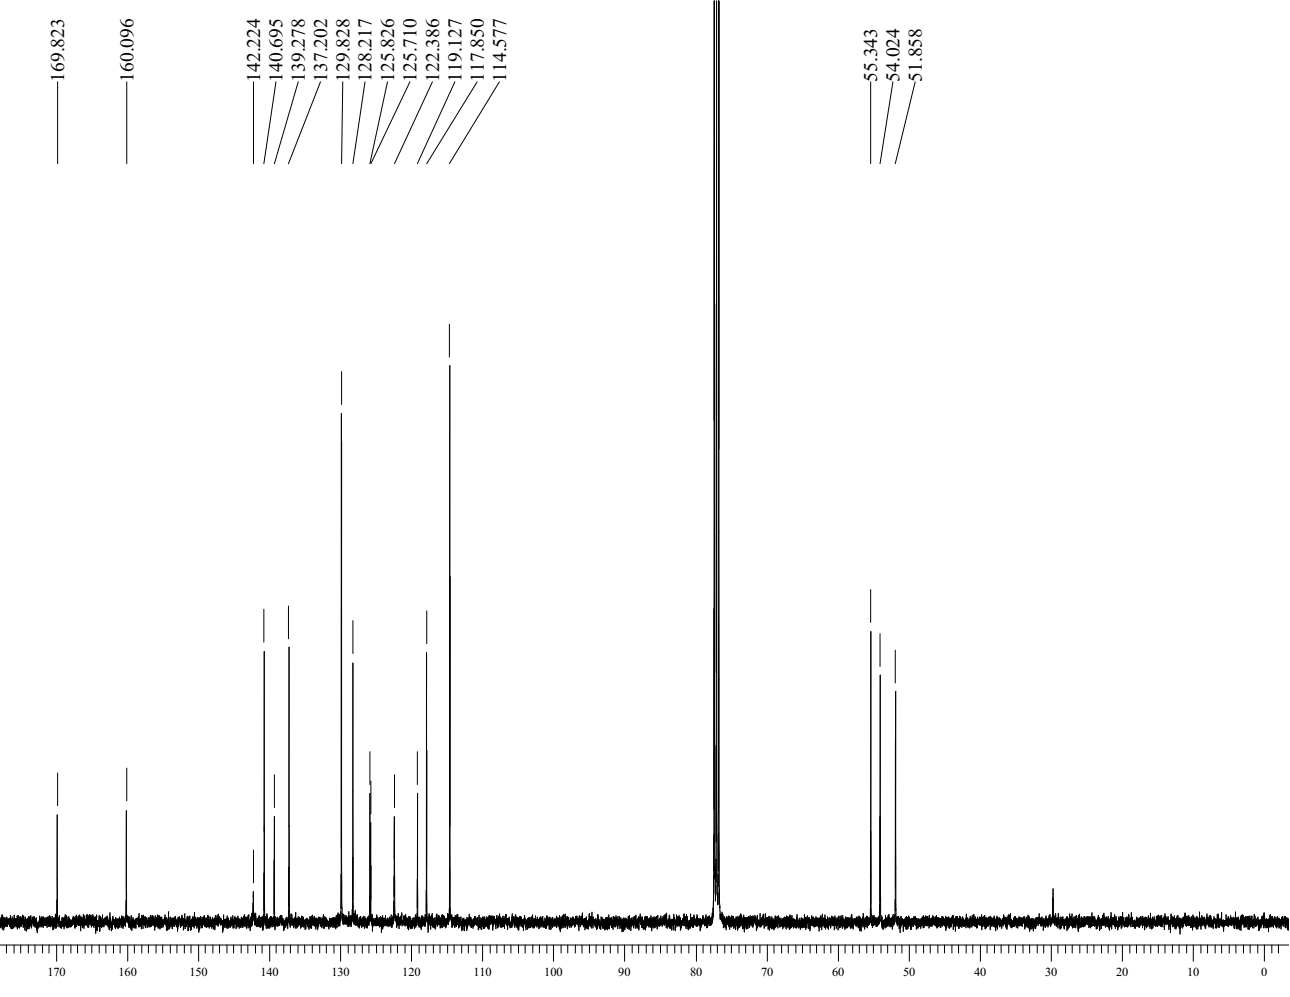
**

**Figure S24:** 13C- NMR spectrum of compound **9f**

**
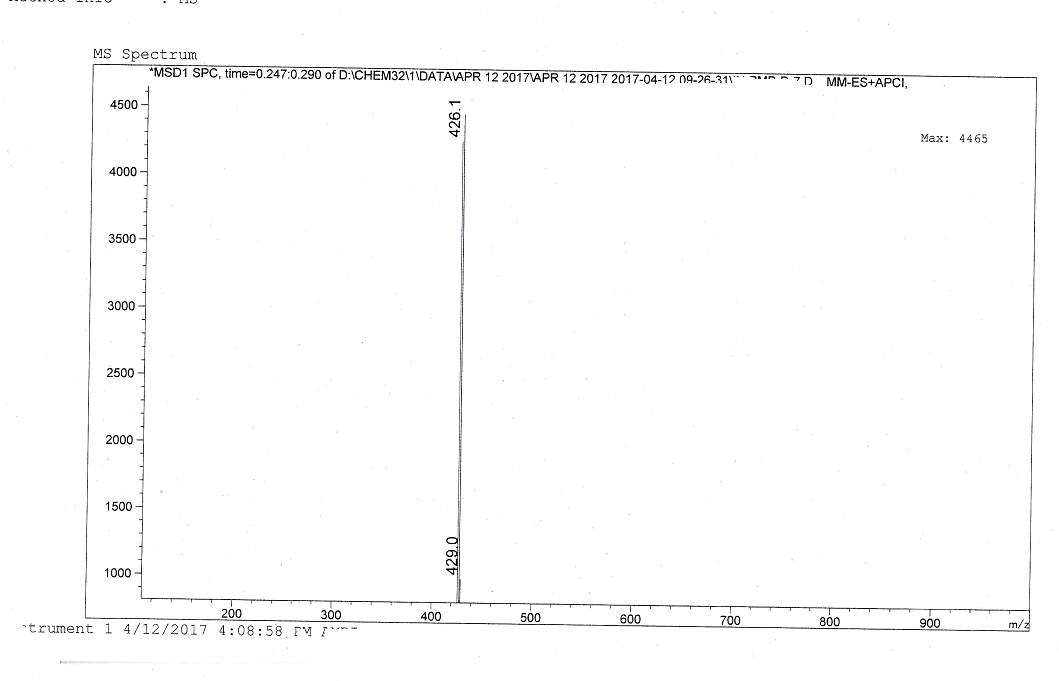
**

**Figure S25:** ESI Mass spectrum of compound **9f**


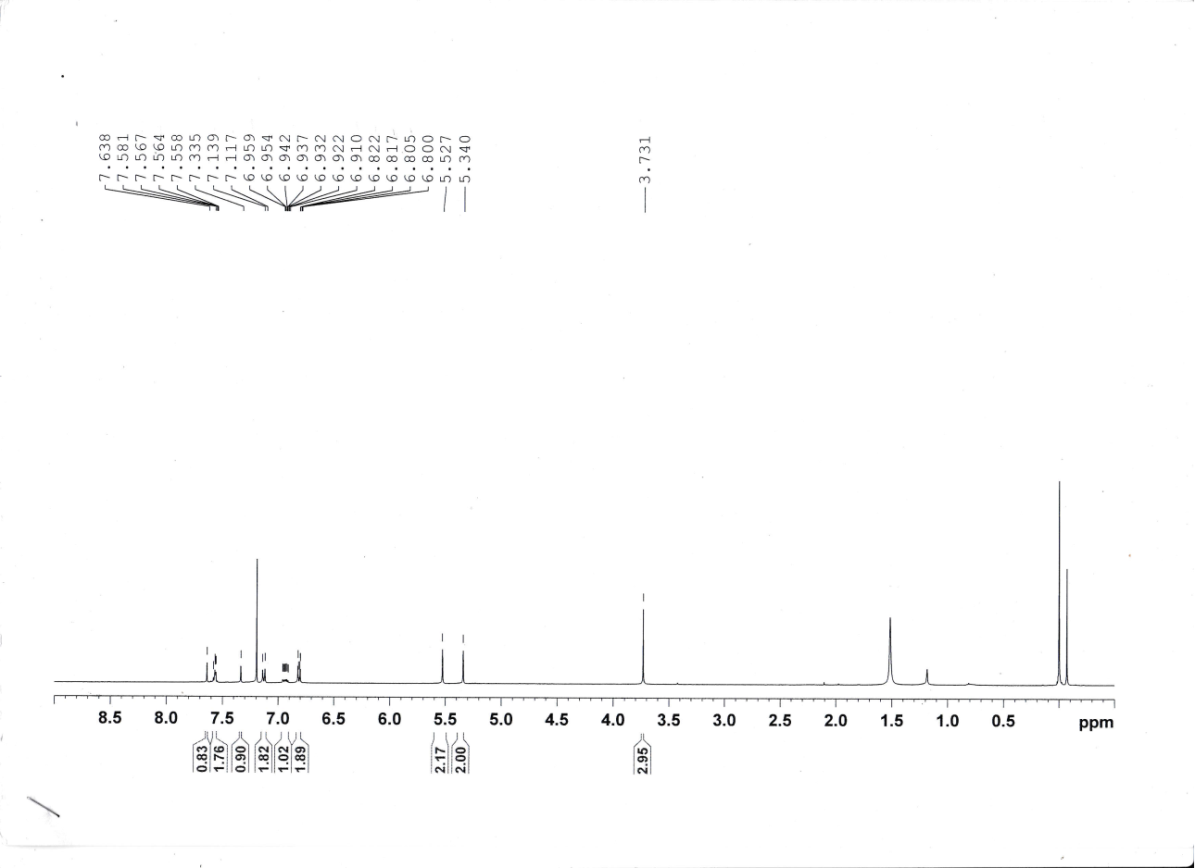


**Figure S26:** 1H-NMR spectrum of compound **9g**


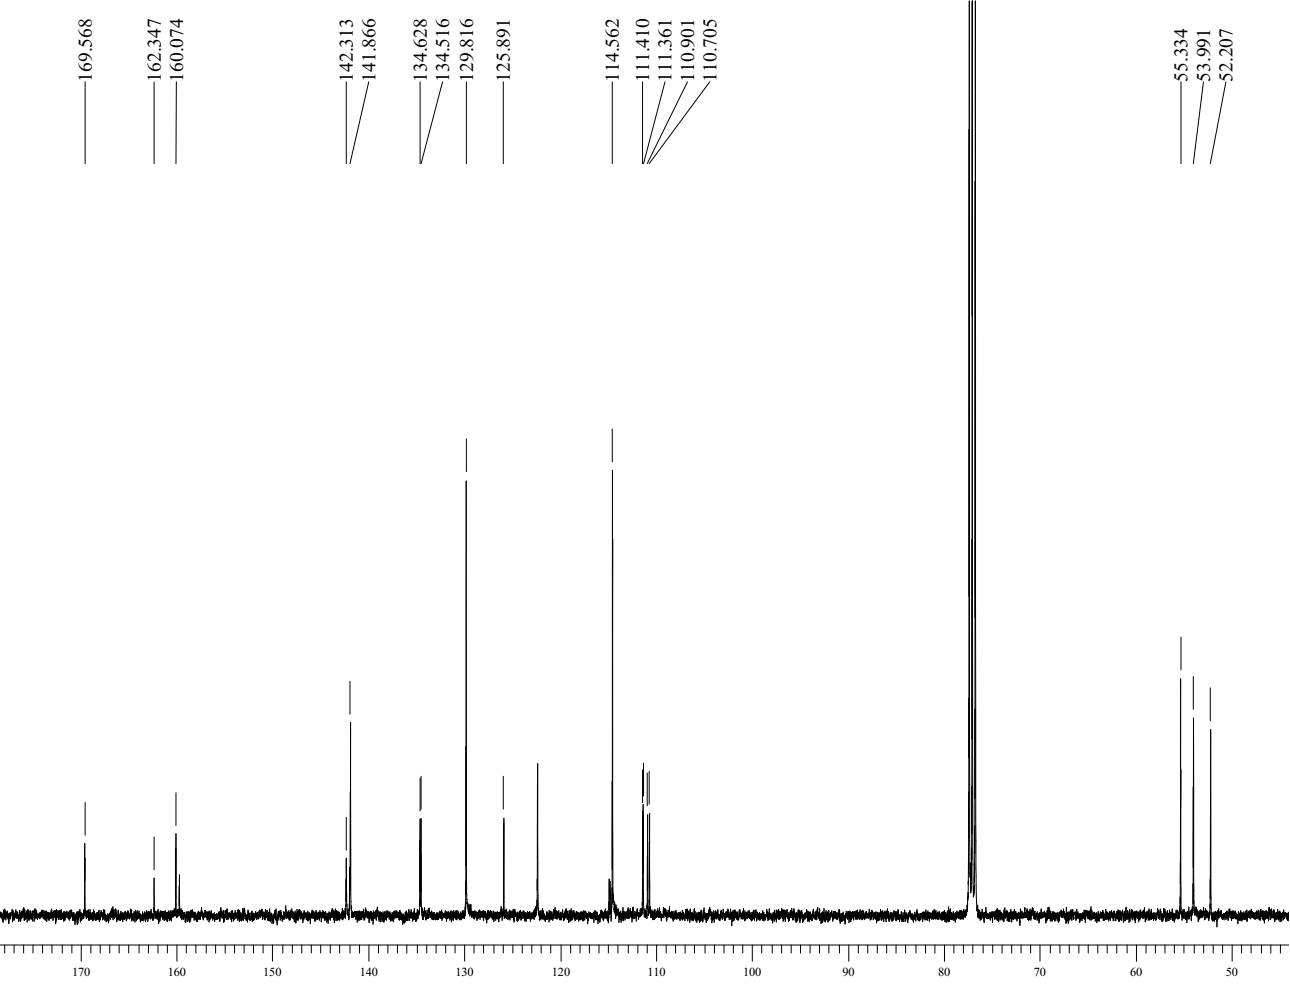


**Figure S27:** 13C- NMR spectrum of compound **9f**

**
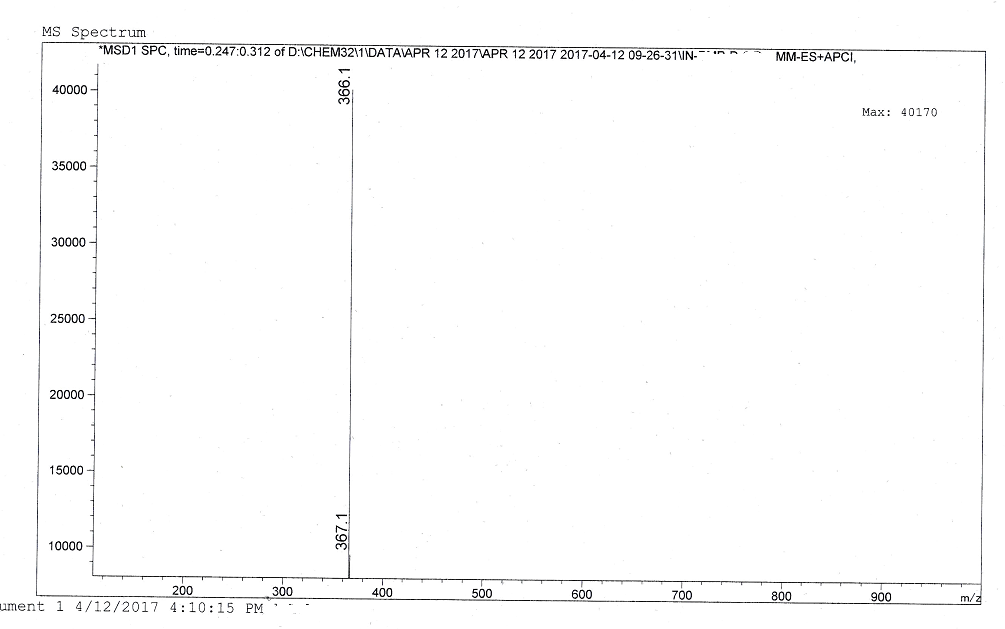
**

**Figure S28:** ESI Mass spectrum of compound **9f**


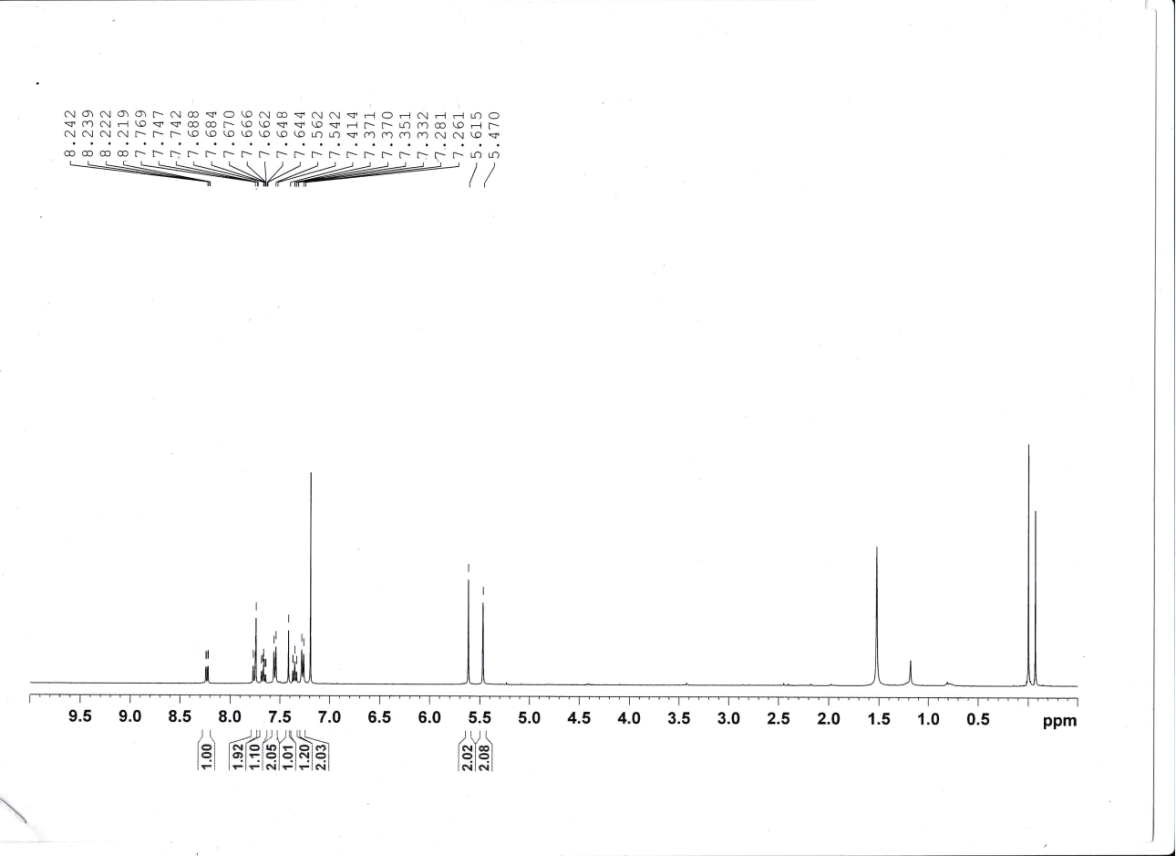


**Figure S29:** 1H-NMR spectrum of compound **9h**


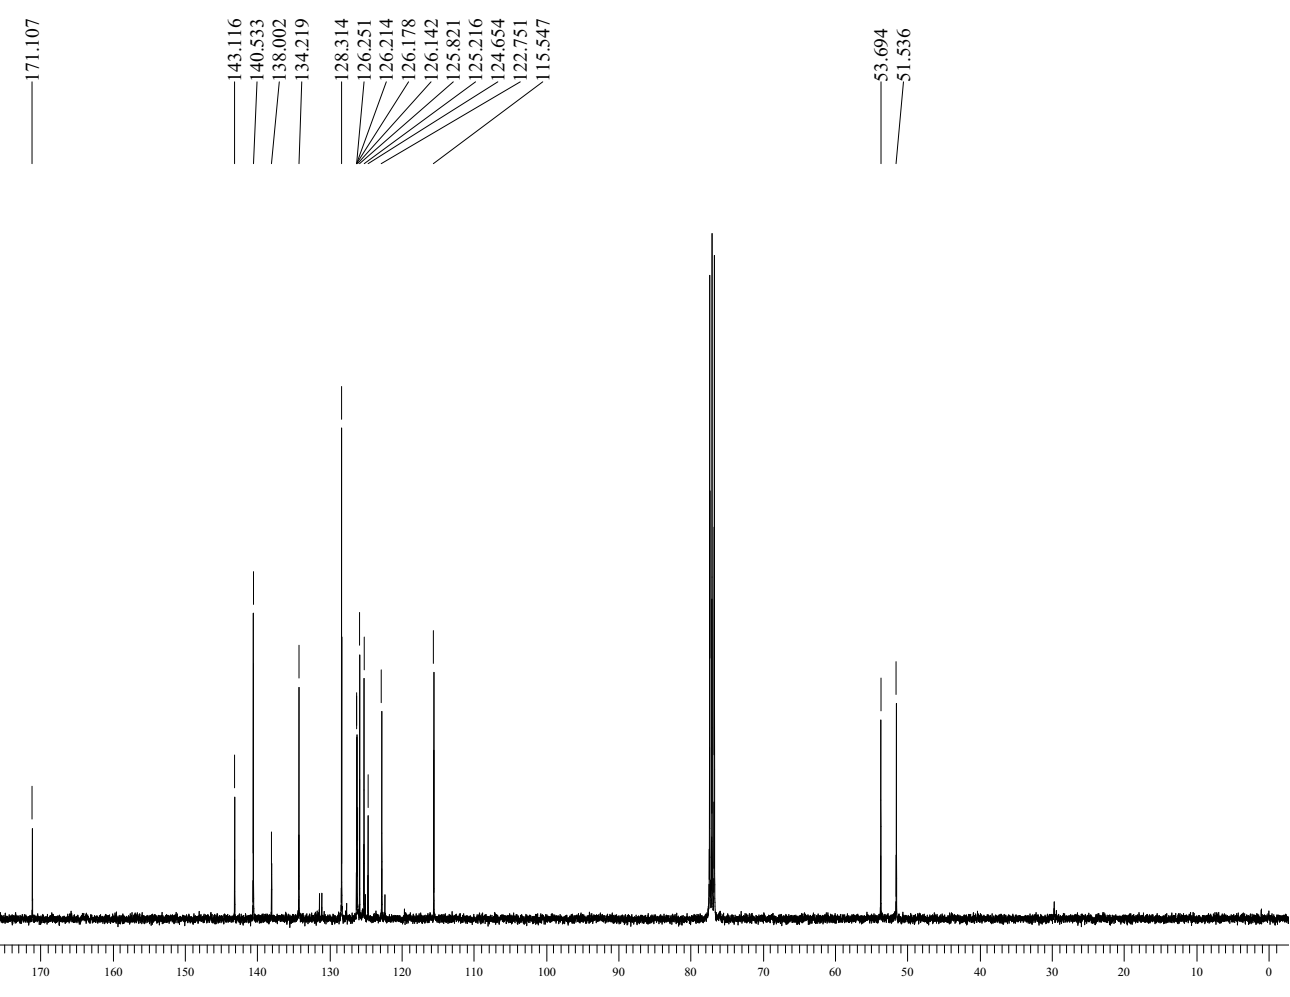


**Figure S30:** 13C- NMR spectrum of compound **9h**

**
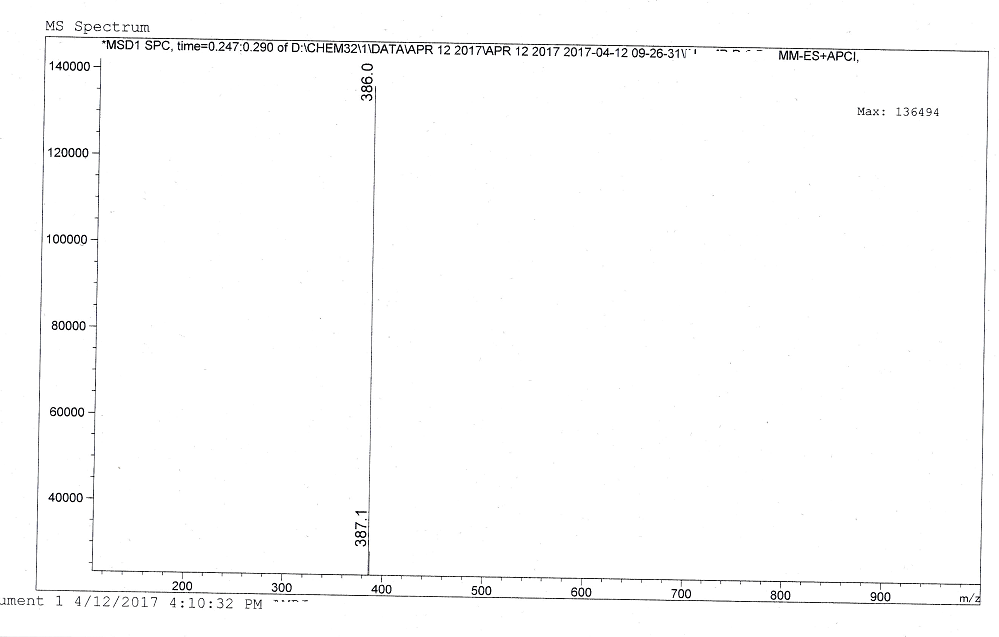
**

**Figure S31:** ESI Mass spectrum of compound **9h**


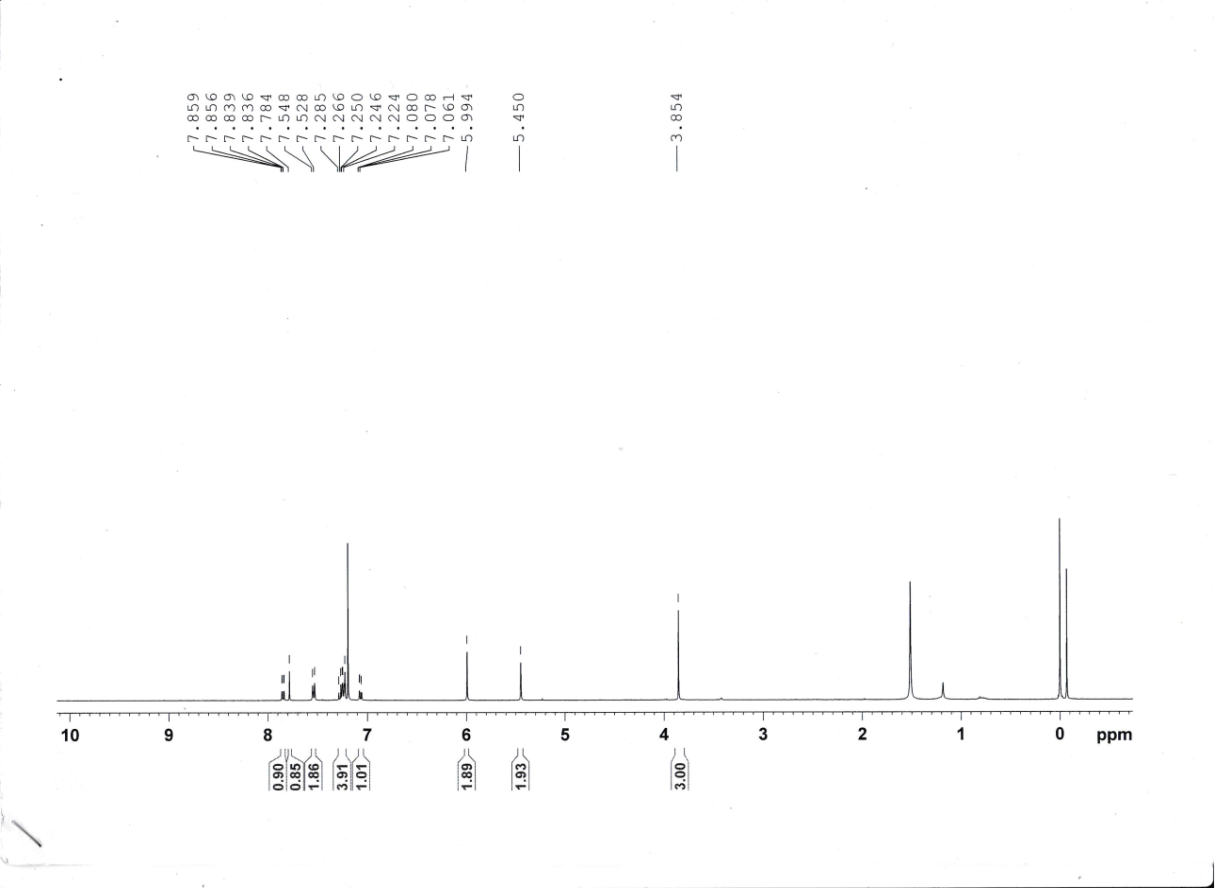


**Figure S32:** 1H-NMR spectrum of compound **9i**


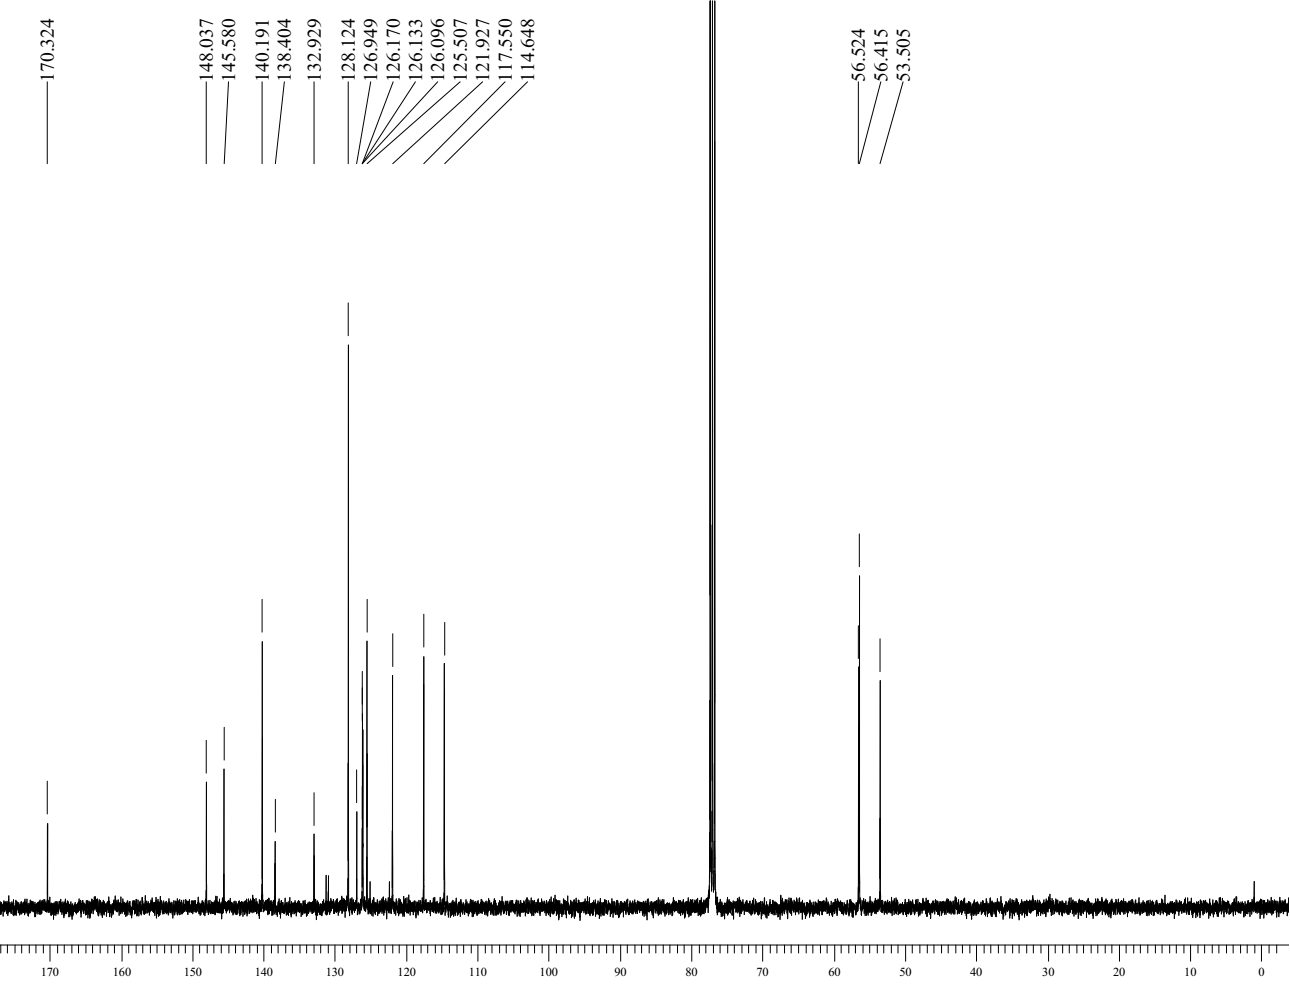


**Figure S33:** 13C- NMR spectrum of compound **9i**

**
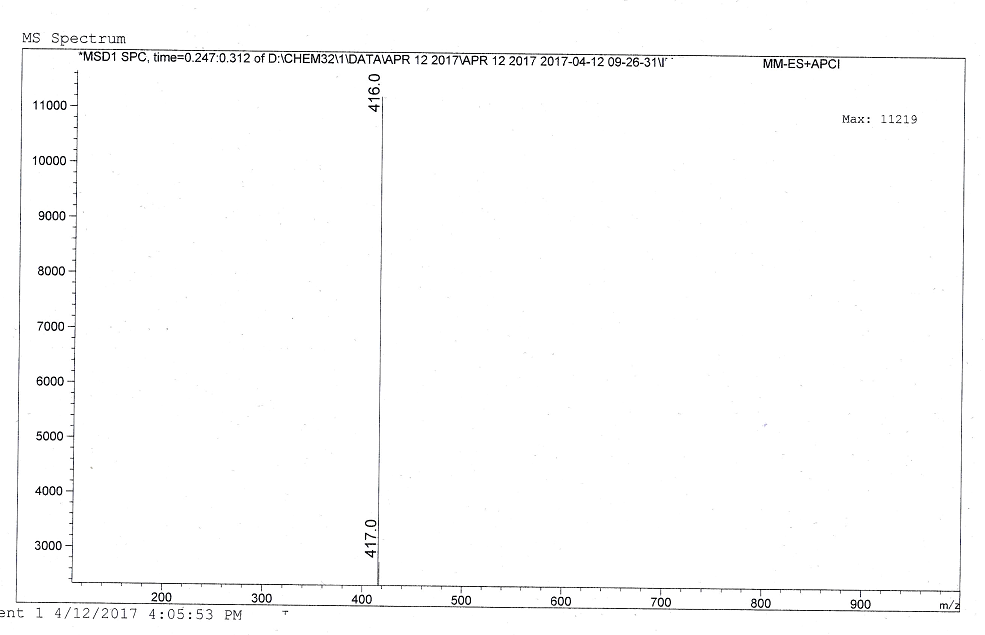
**

**Figure S34:** ESI Mass spectrum of compound **9i**


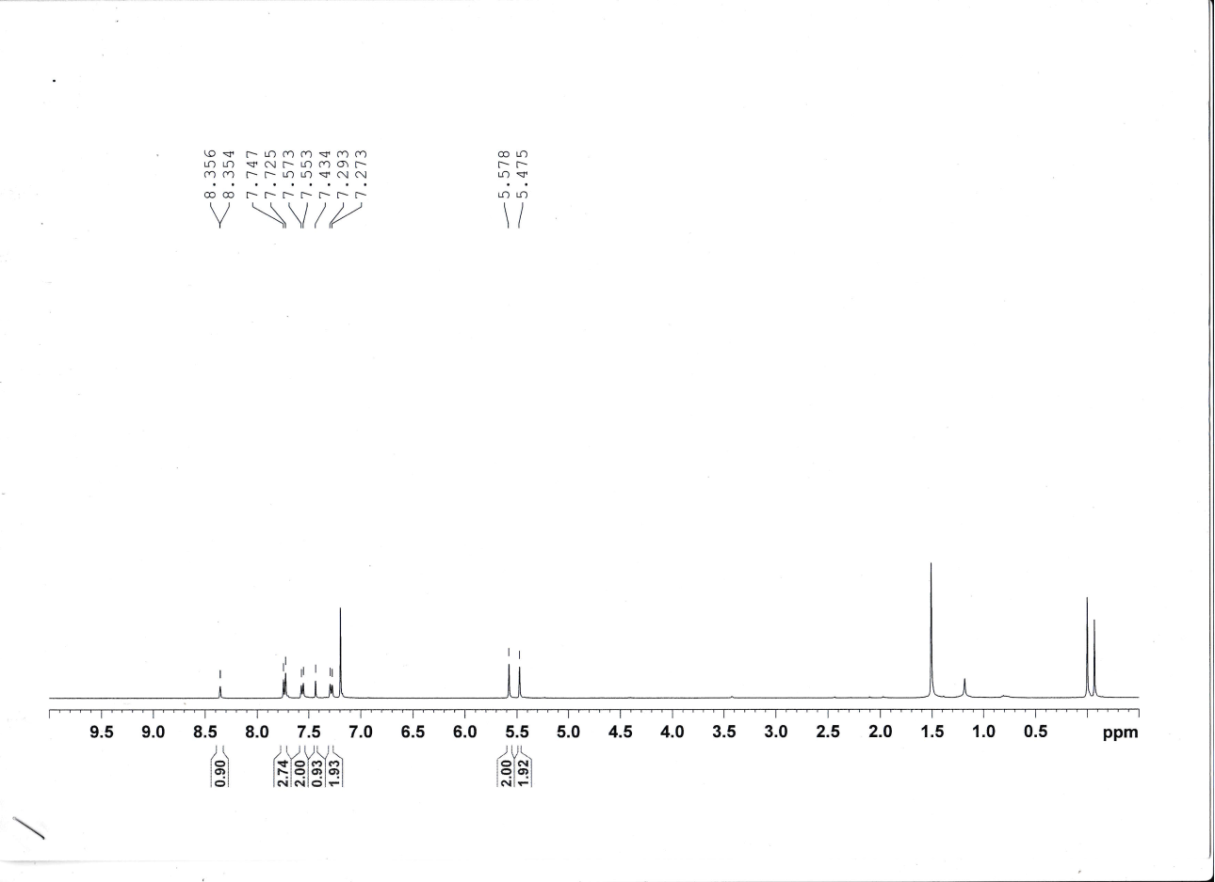


**Figure S35:** 1H-NMR spectrum of compound **9j**


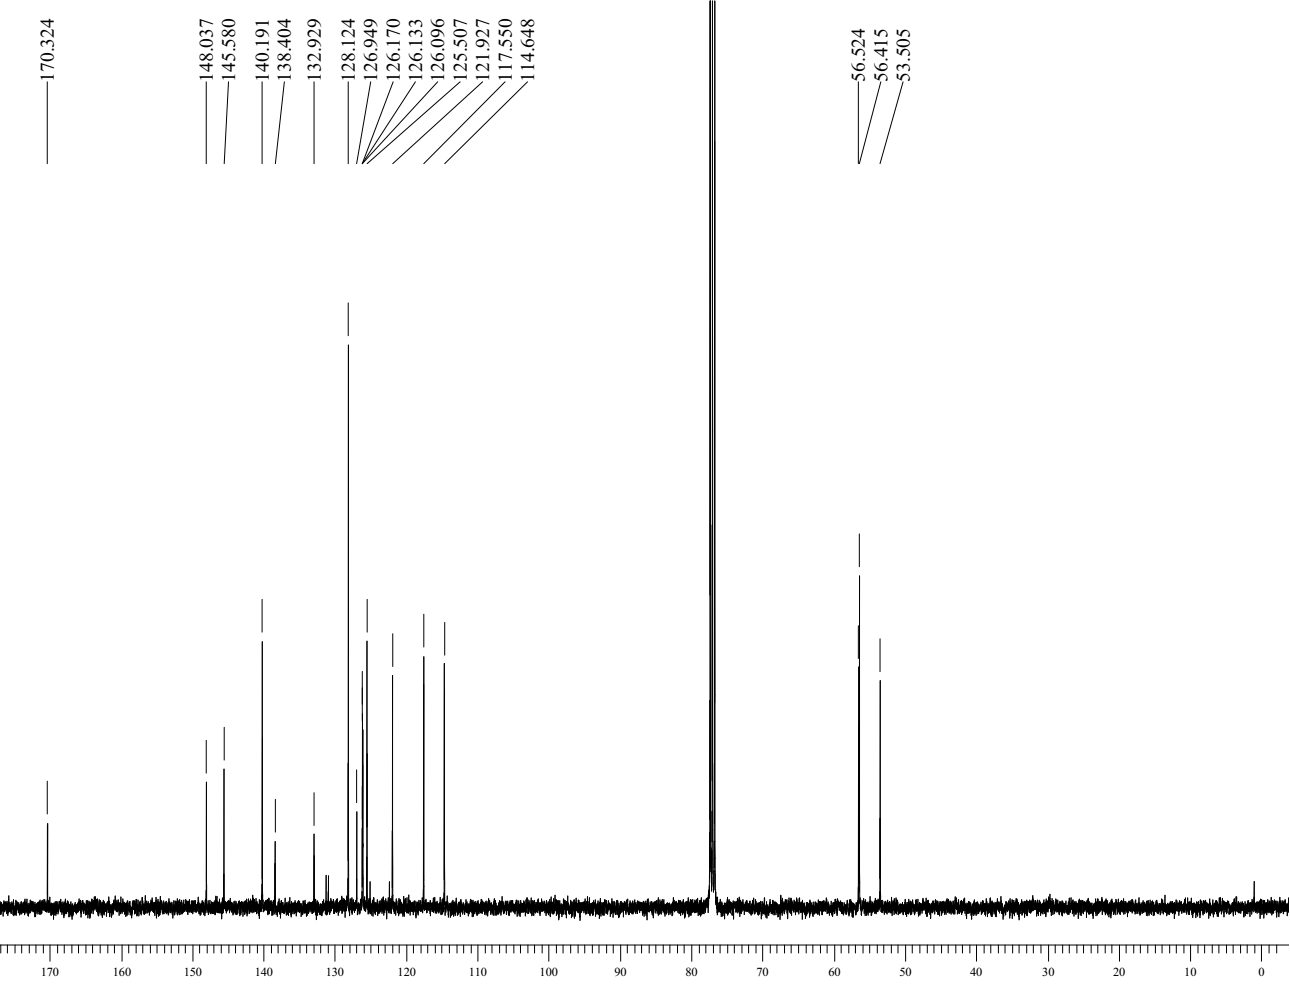


**Figure S36:** 13C- NMR spectrum of compound **9j**

**
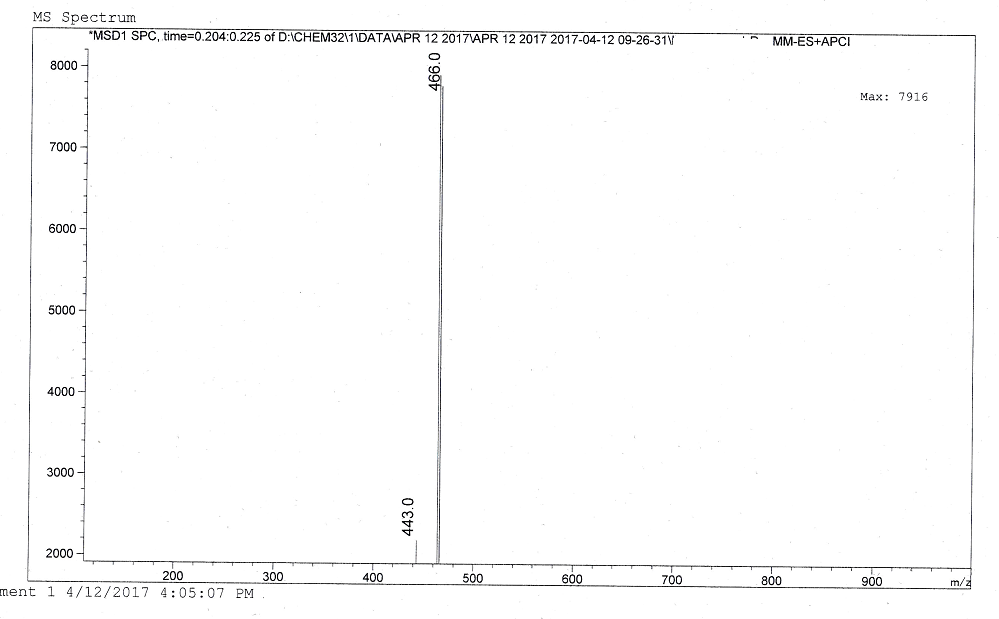
**

**Figure S37:** ESI Mass spectrum of compound **9j**


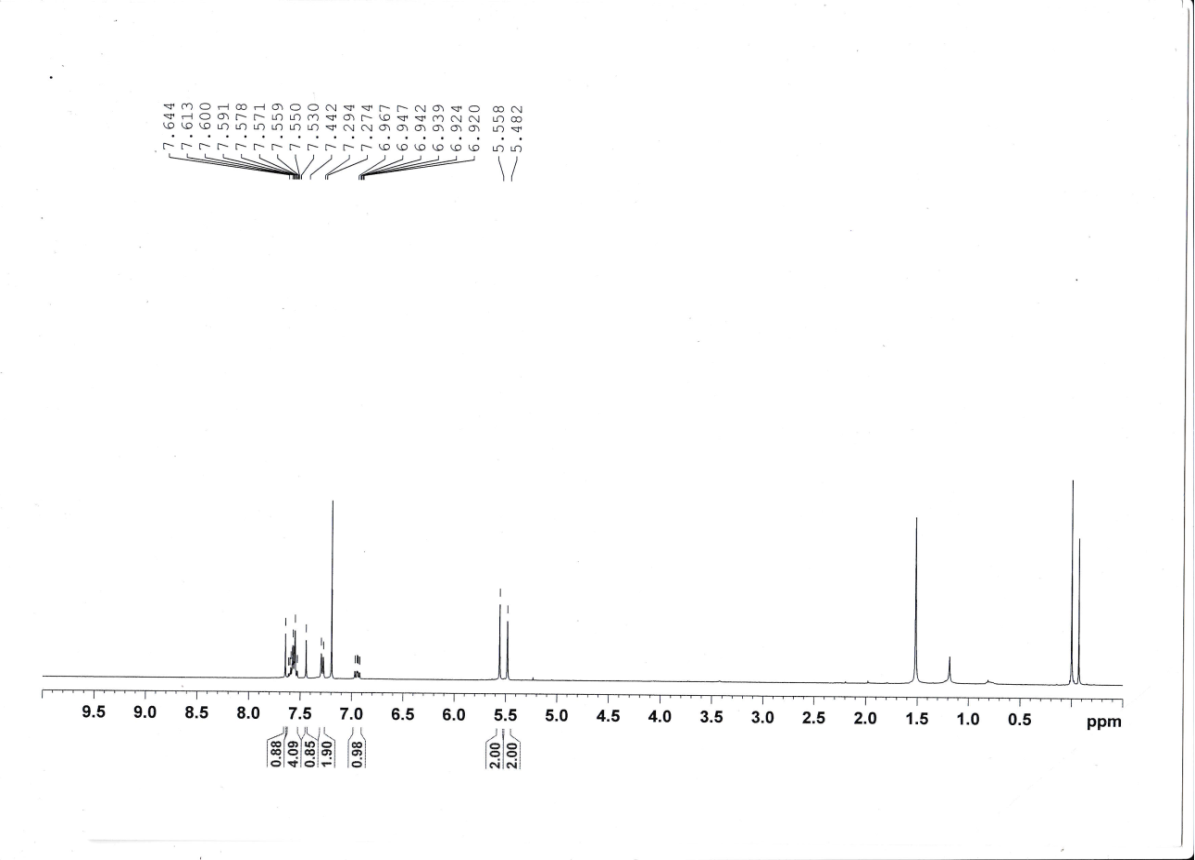


**Figure S38:** 1H-NMR spectrum of compound **9k**


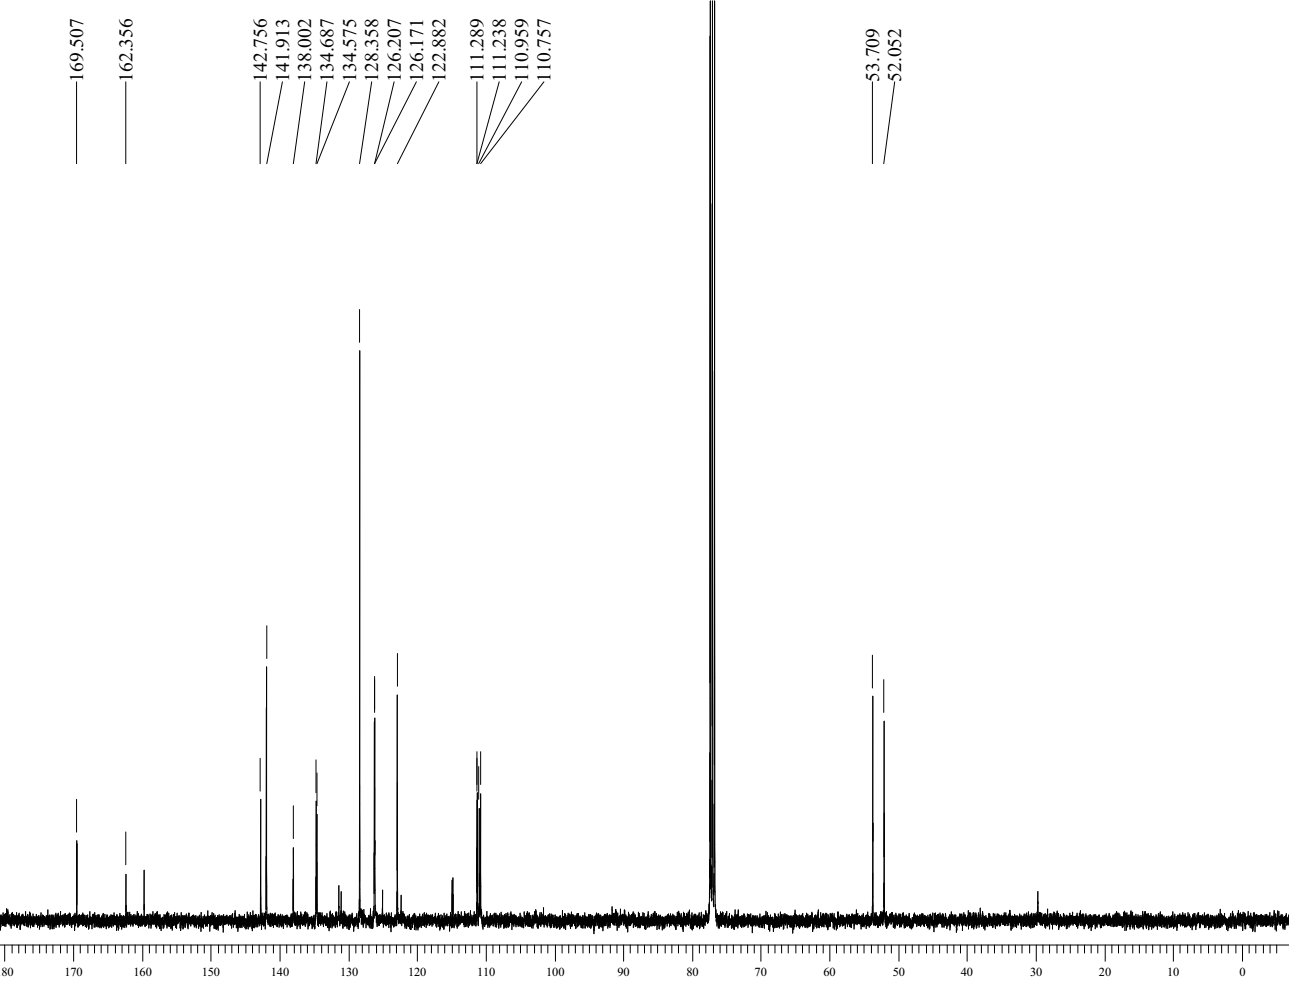


**Figure S39:** 13C- NMR spectrum of compound **9k**

**
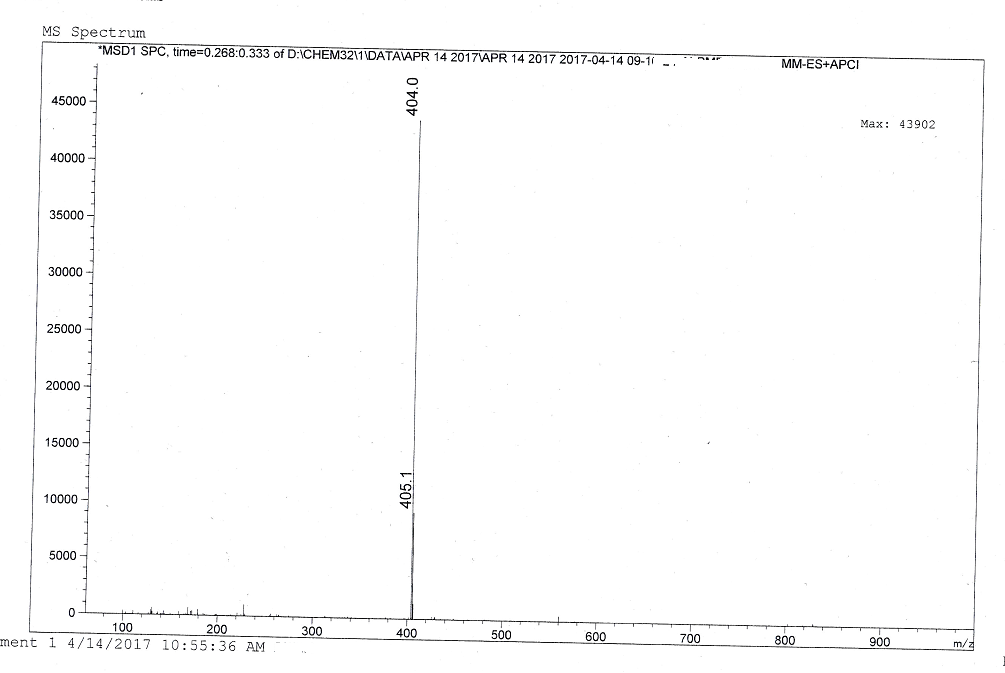
**

**Figure S40:** ESI Mass spectrum of compound **9k**


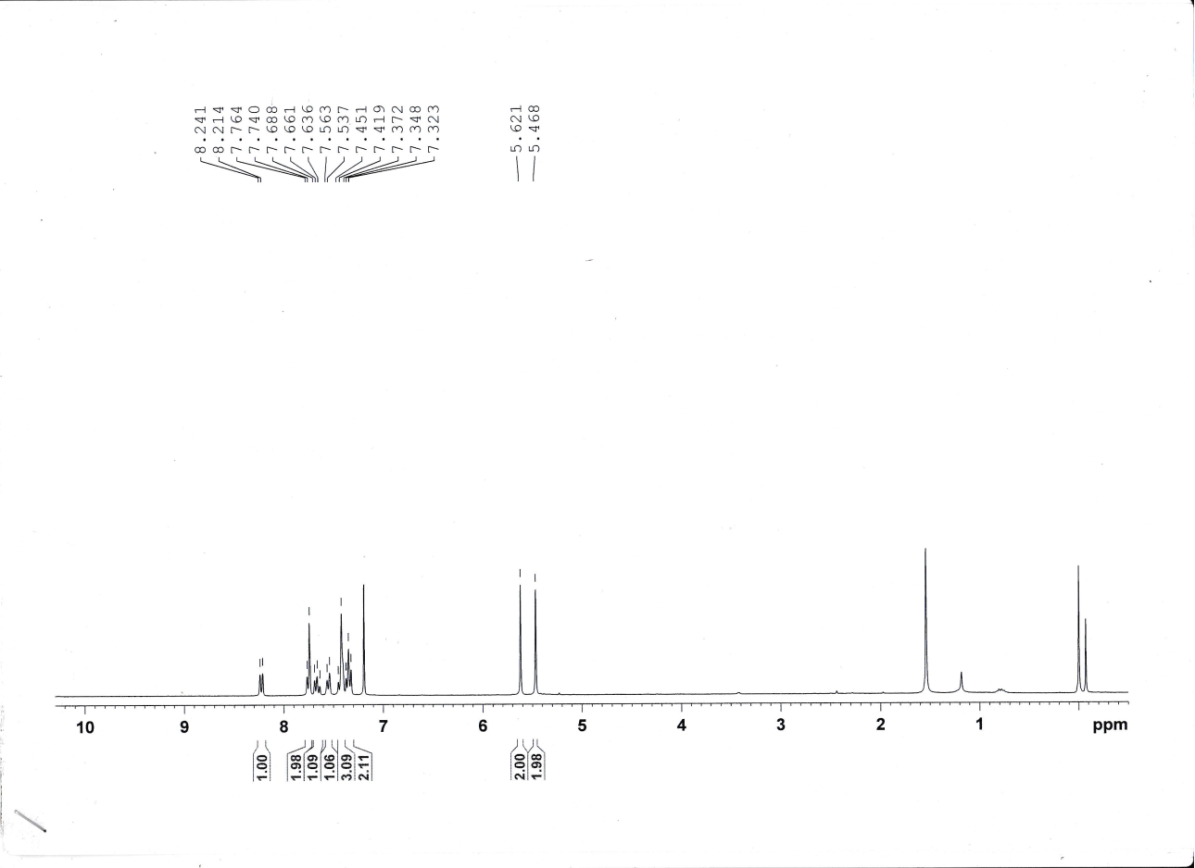


**Figure S41:** 1H-NMR spectrum of compound **9l**


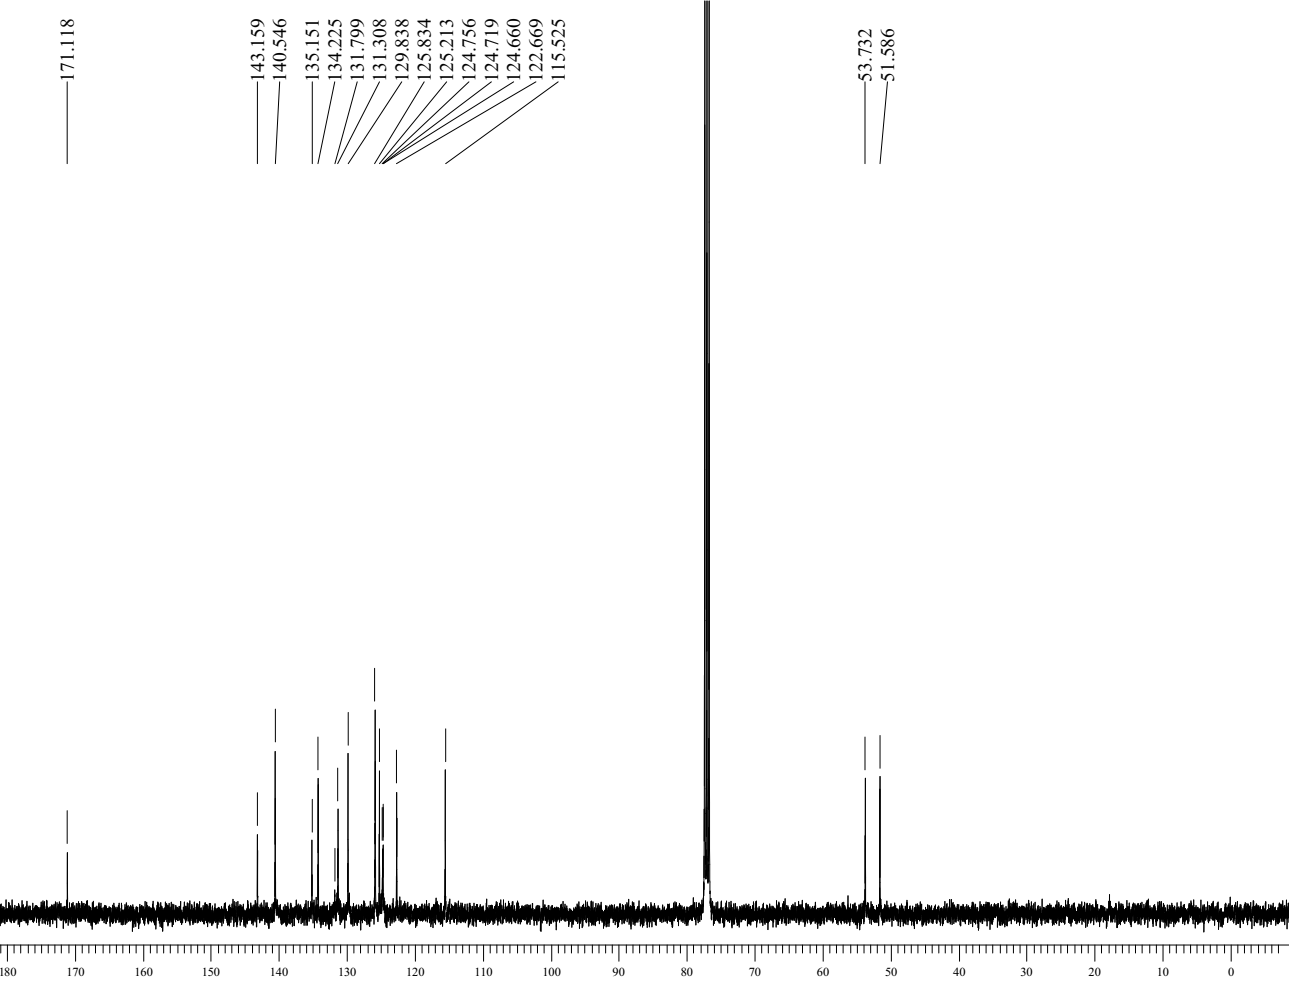


**Figure S42:** 13C- NMR spectrum of compound **9l**

**
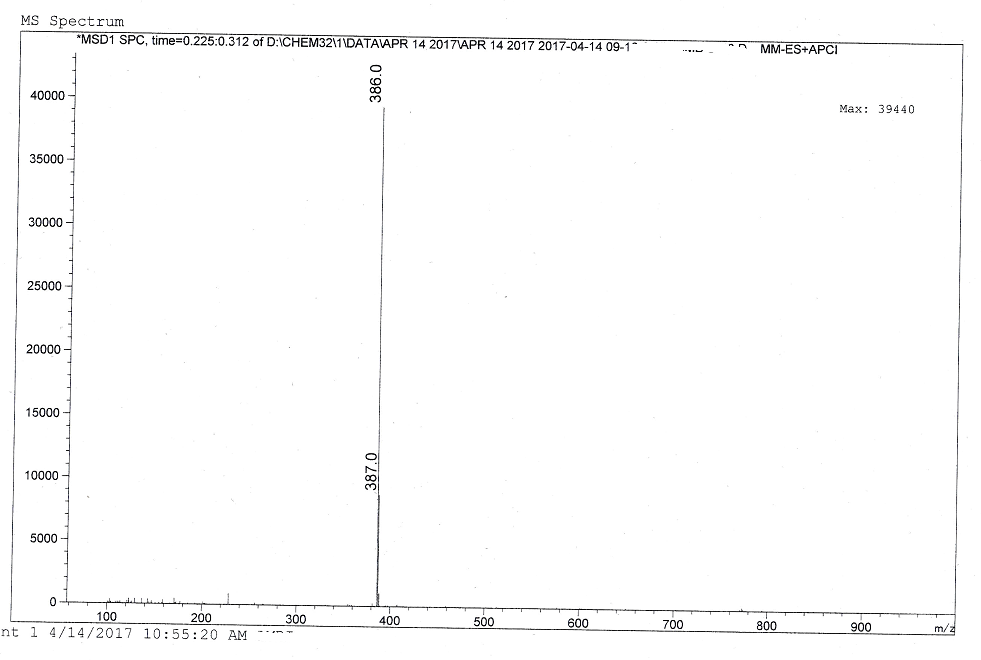
**

**Figure S43:** ESI Mass spectrum of compound **9l**


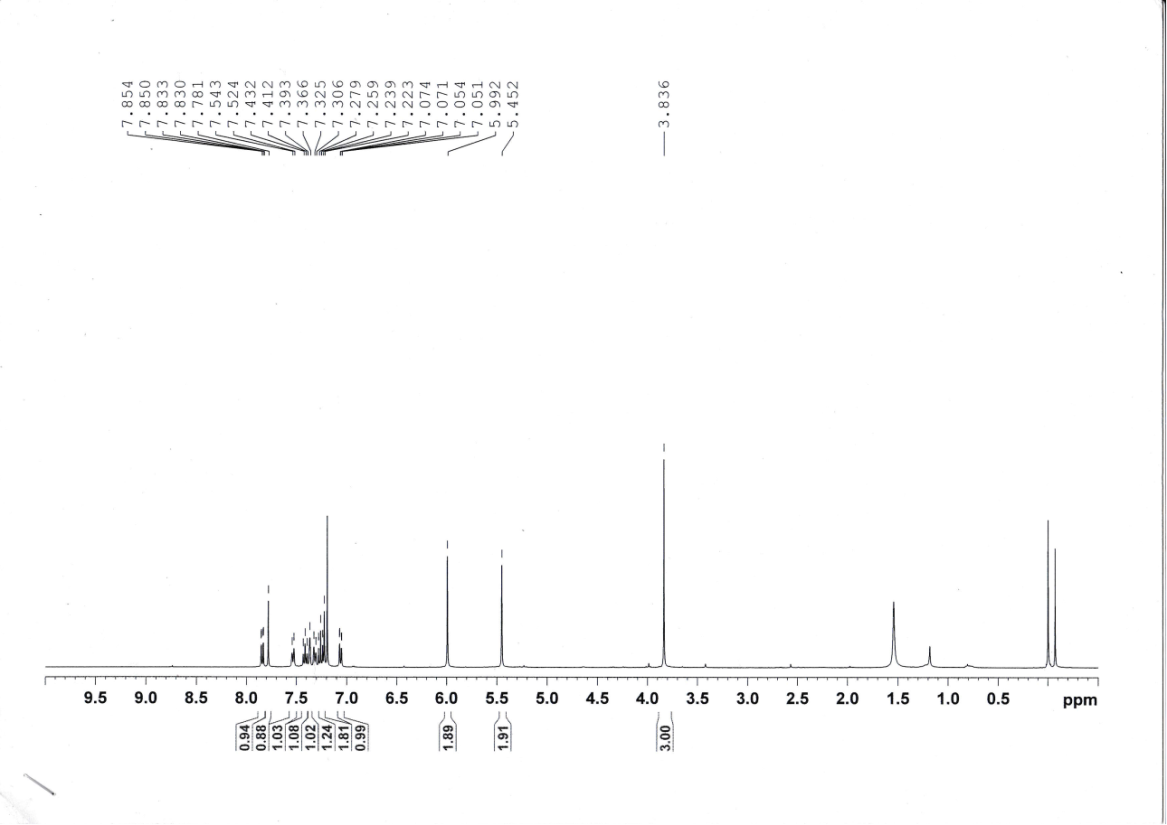


**Figure S44:** 1H-NMR spectrum of compound **9m**


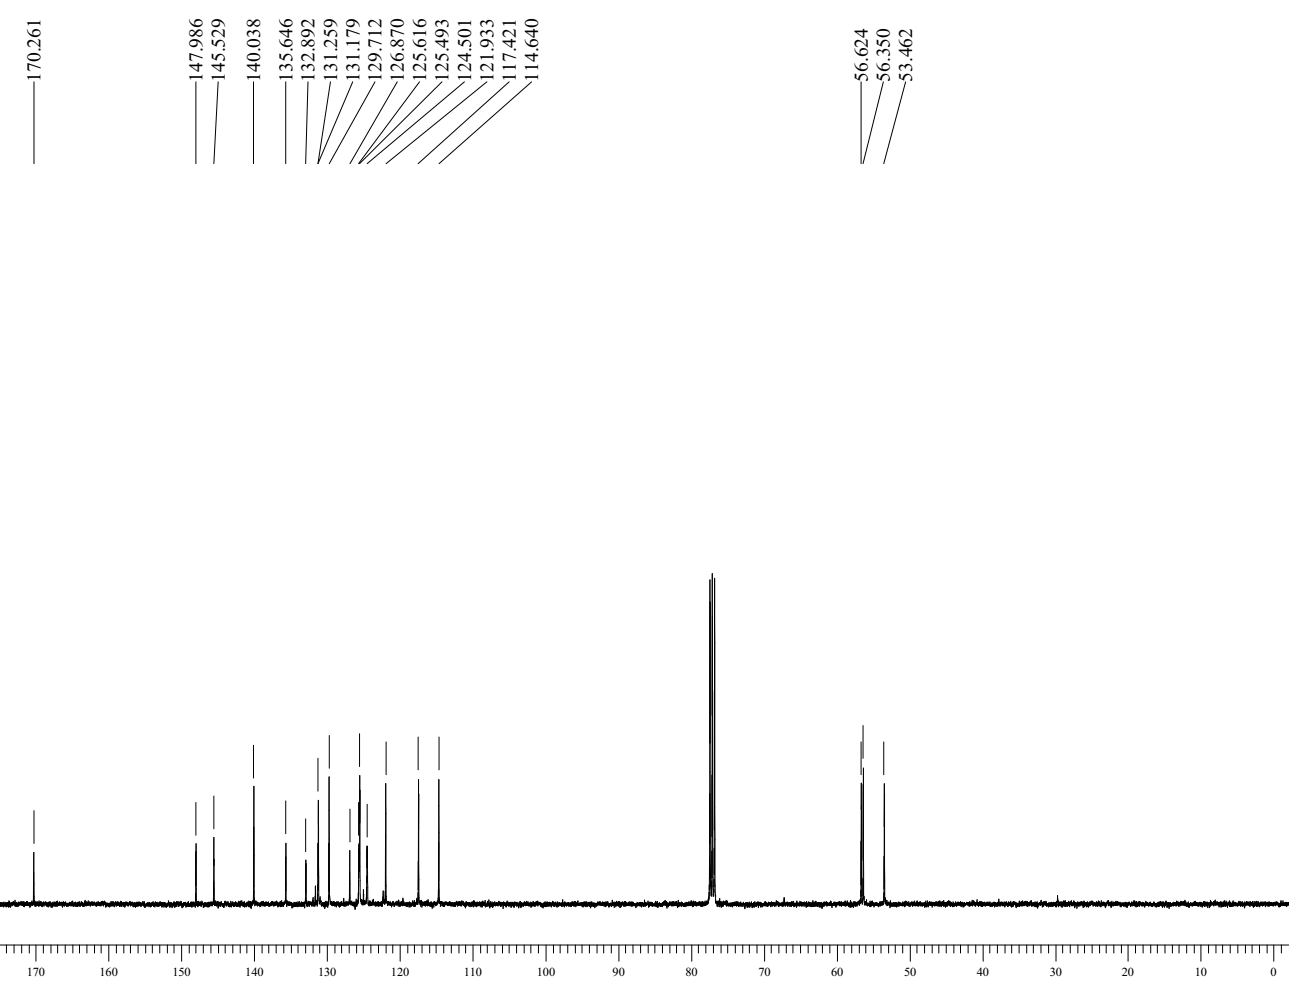


**Figure S45:** 13C- NMR spectrum of compound **9m**

**
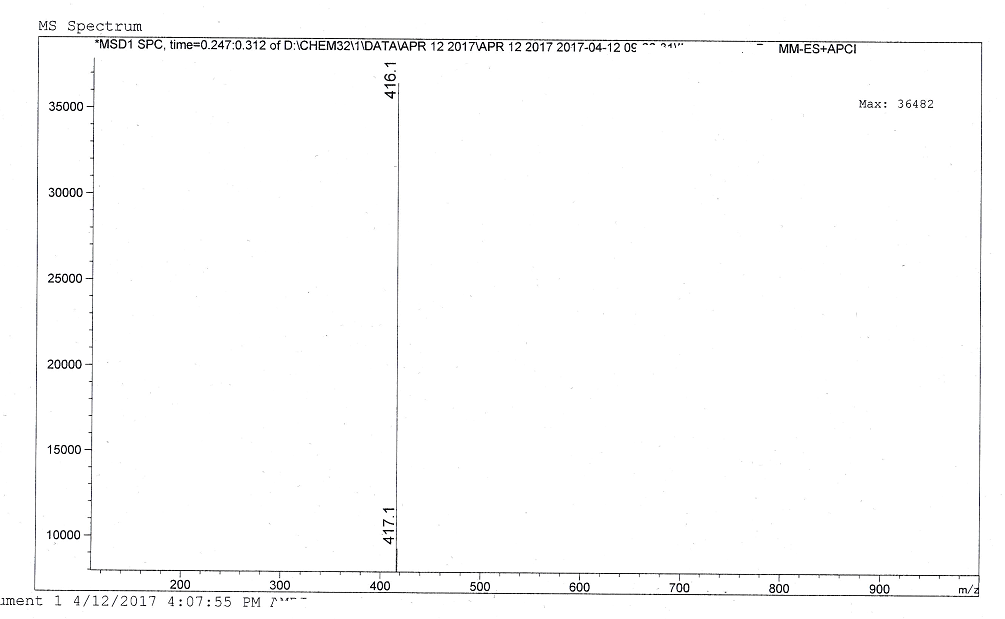
**

**Figure S46:** ESI Mass spectrum of compound **9m**


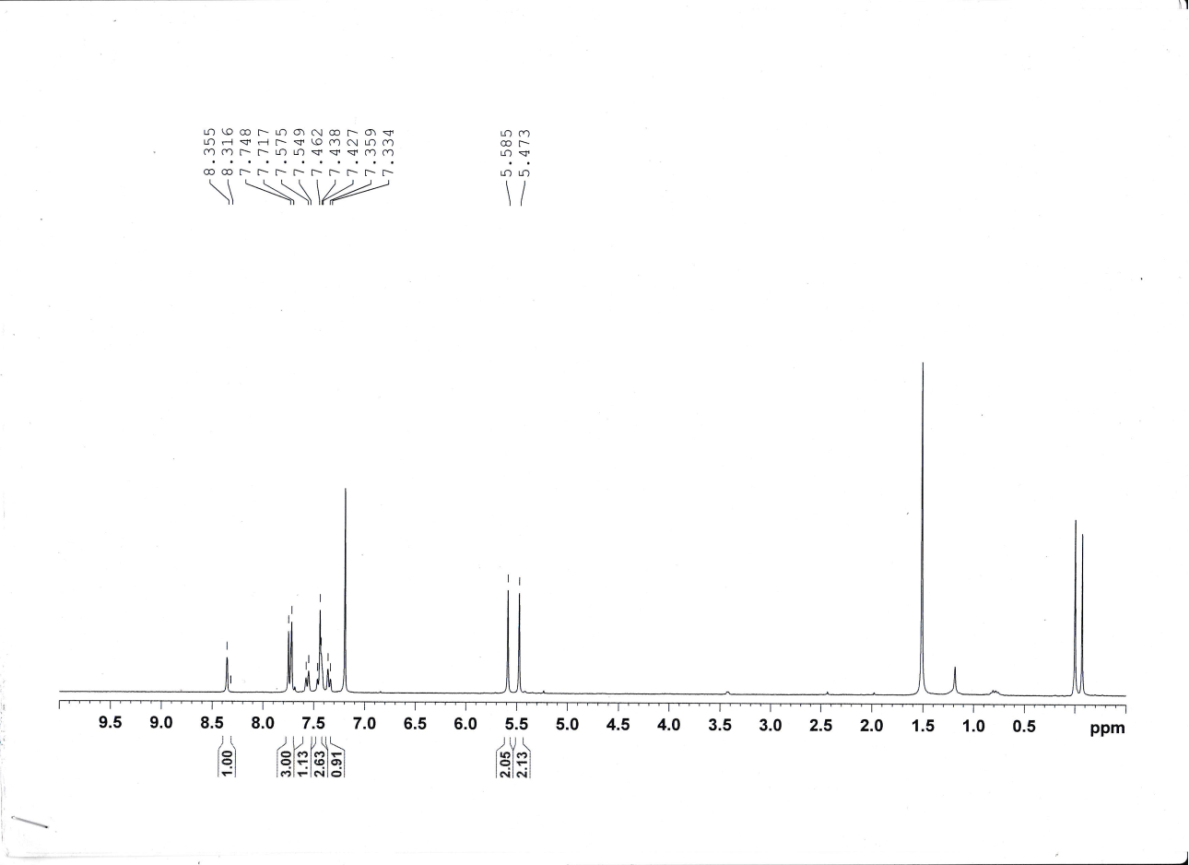


**Figure S47:** 1H-NMR spectrum of compound **9n**


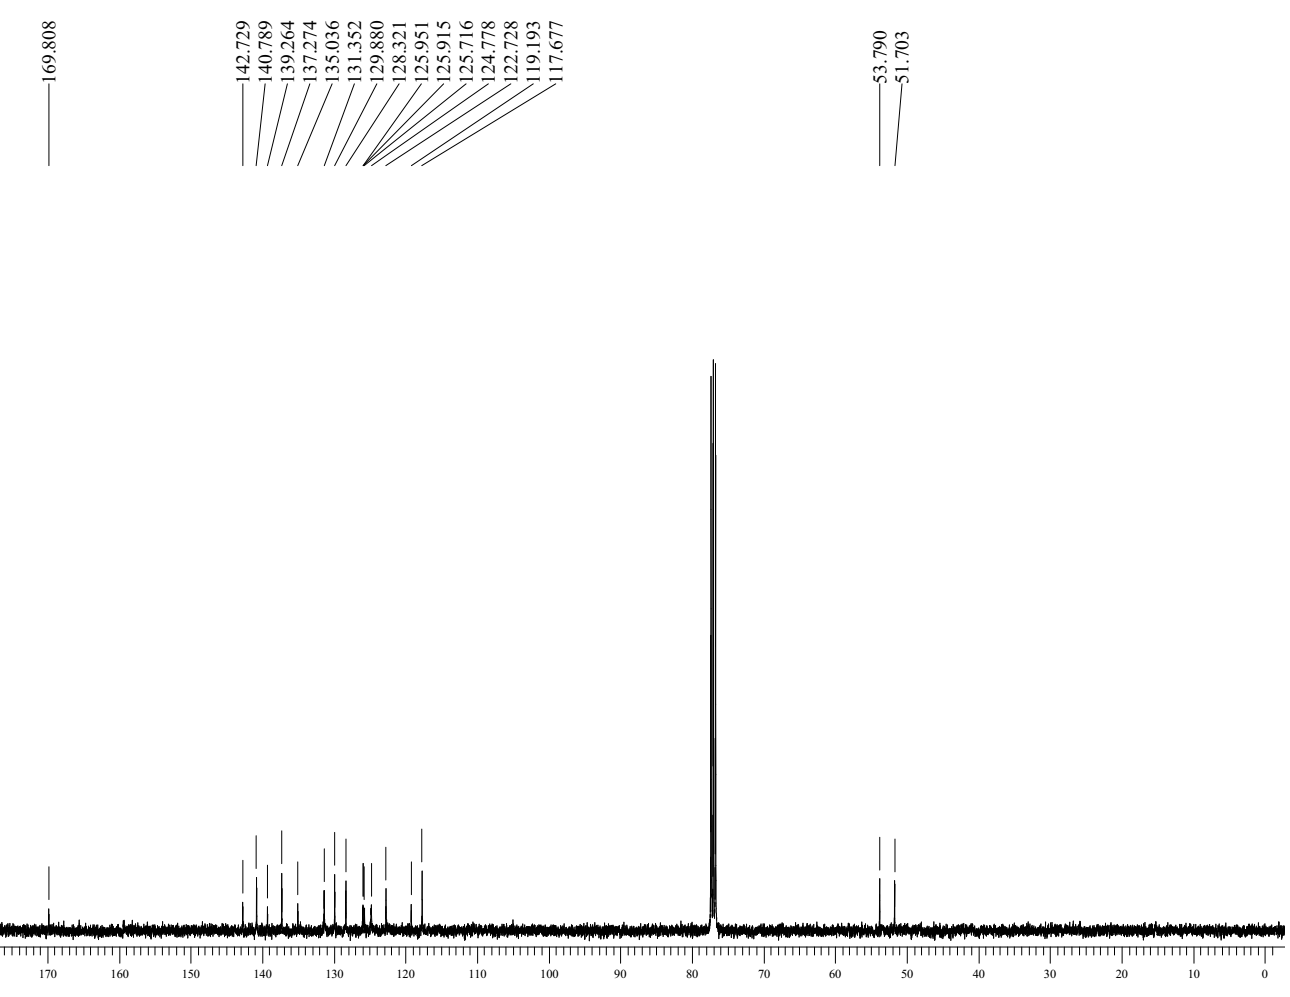


**Figure S48:** 13C- NMR spectrum of compound **9n**

**
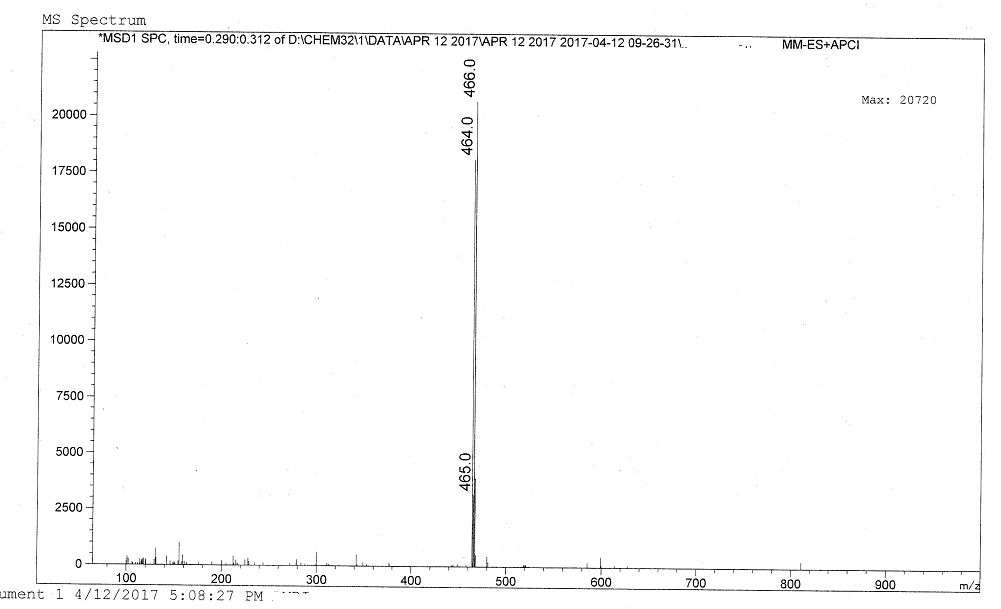
**

**Figure S49:** ESI Mass spectrum of compound **9n**


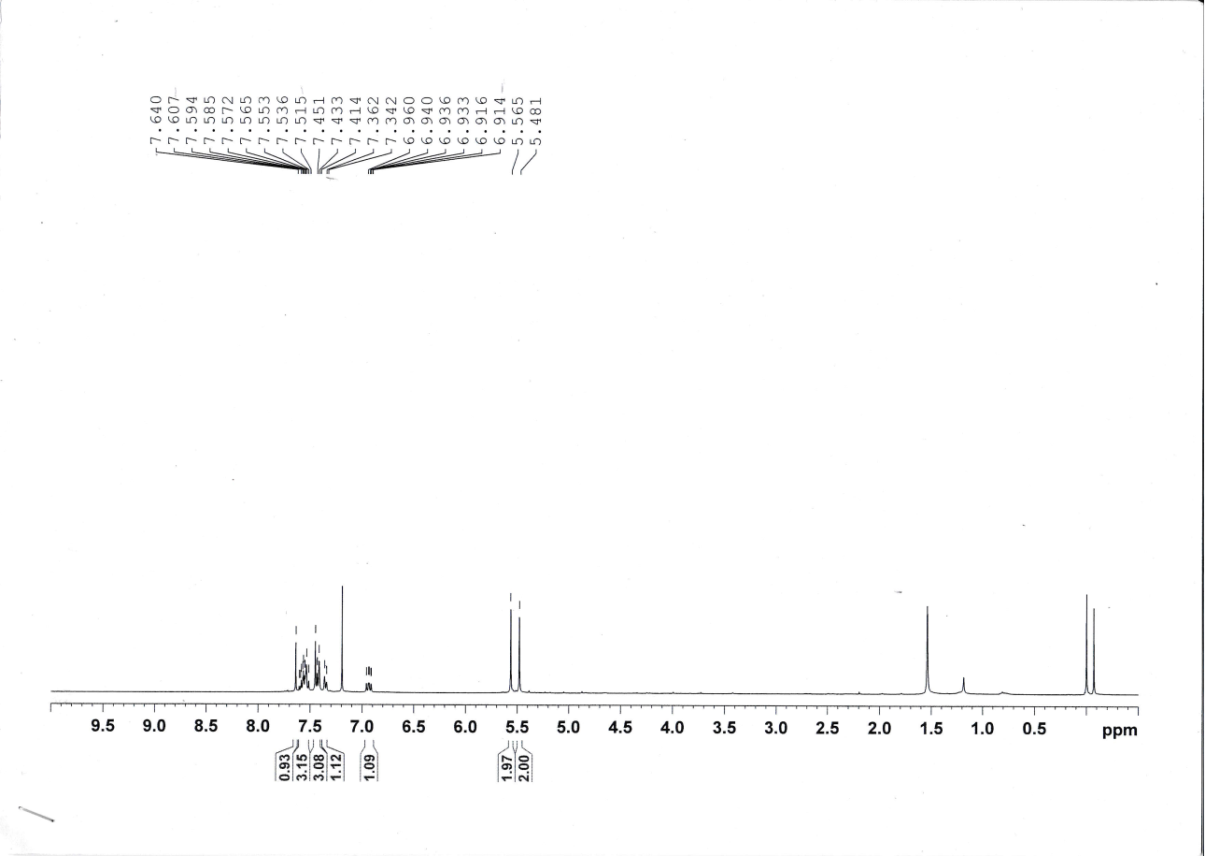


**Figure S50:** 1H-NMR spectrum of compound **9o**


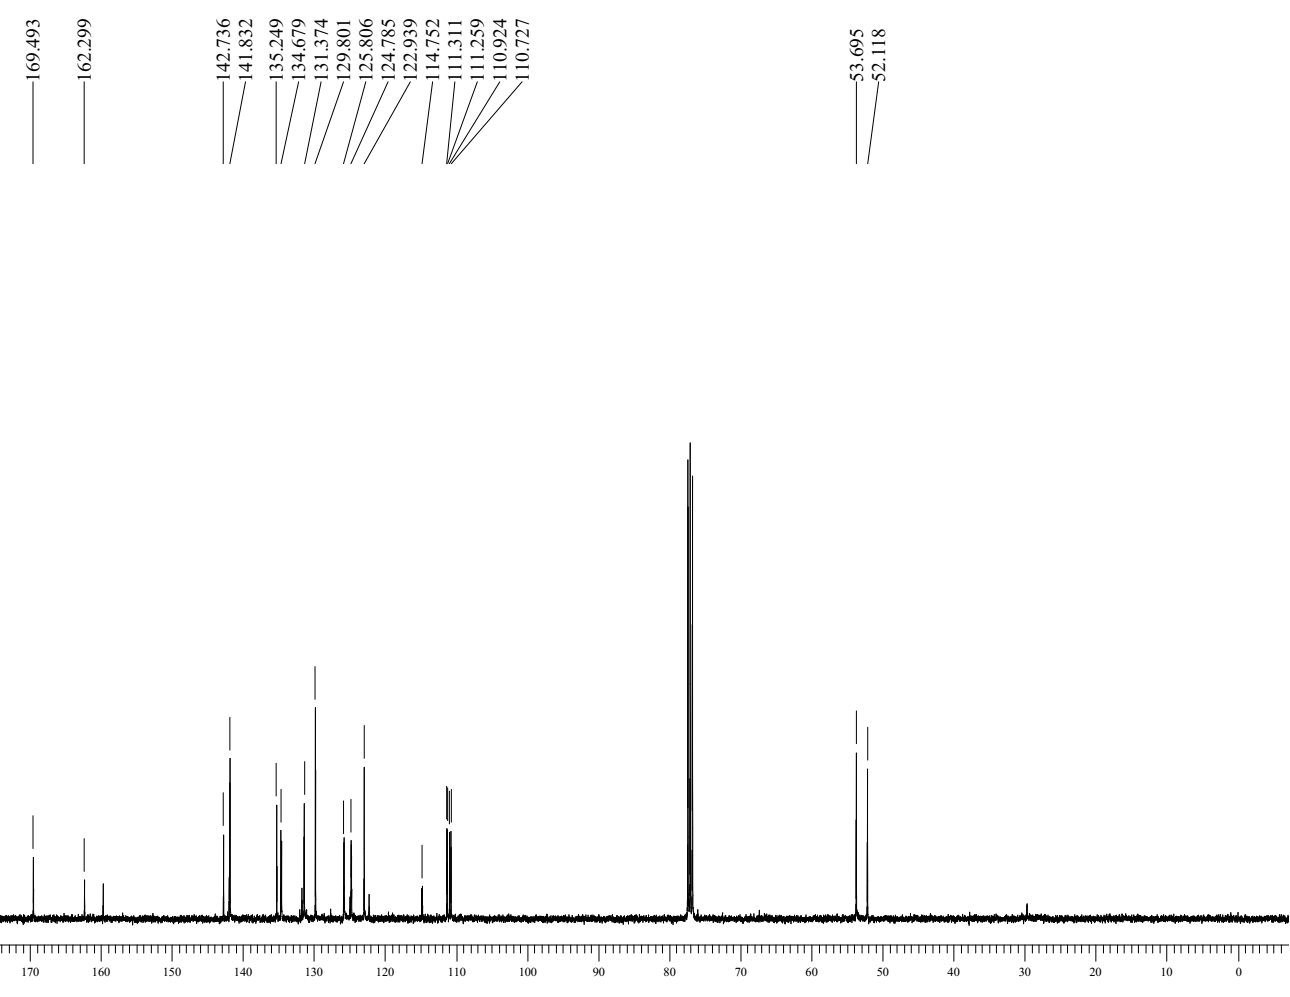


**Figure S51:** 13C- NMR spectrum of compound **9o**

**
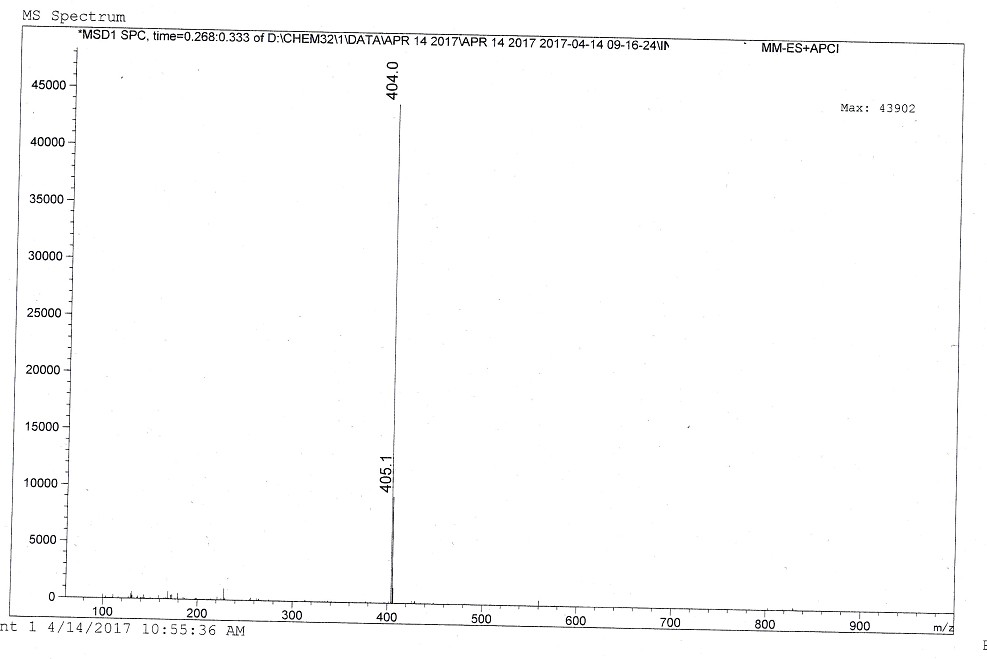
**

**Figure S52:** ESI Mass spectrum of compound **9o**


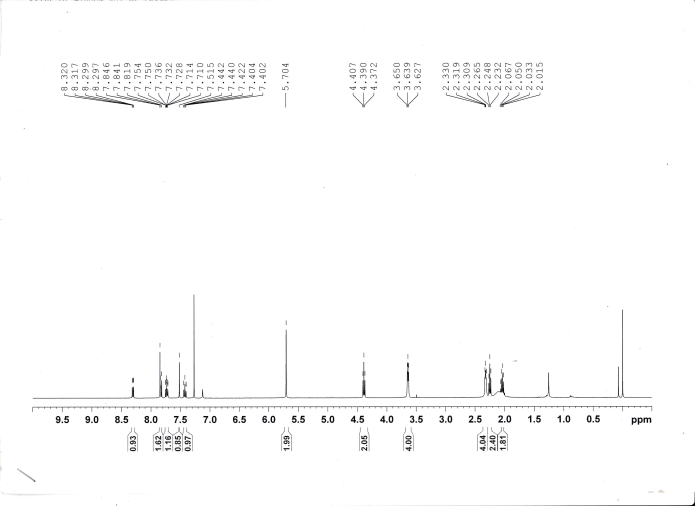


**Figure S53:** 1H-NMR spectrum of compound **10a**


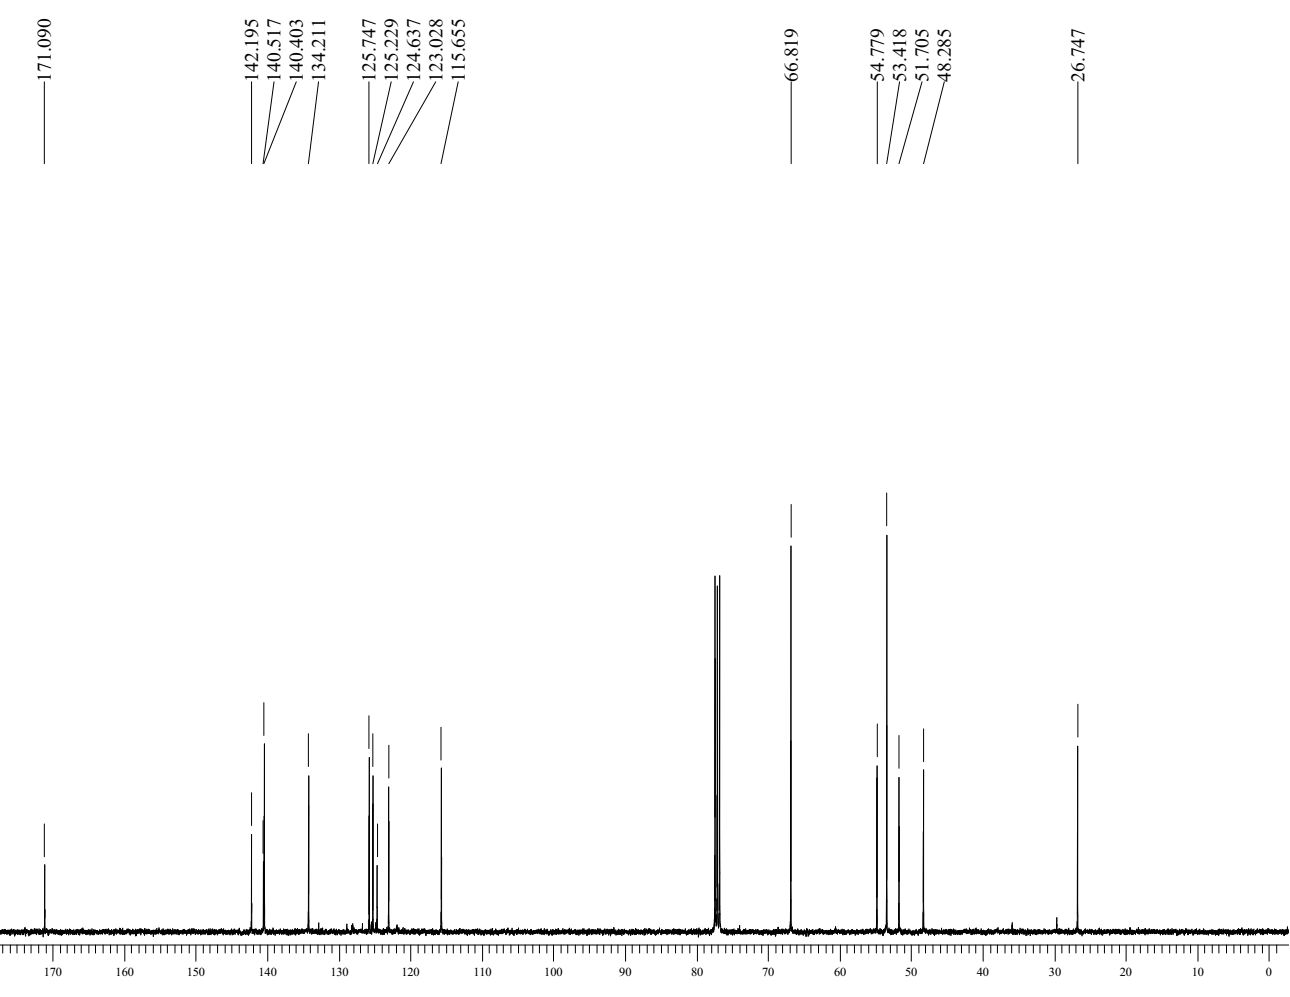


**Figure S54:** 13C- NMR spectrum of compound **10a**

**
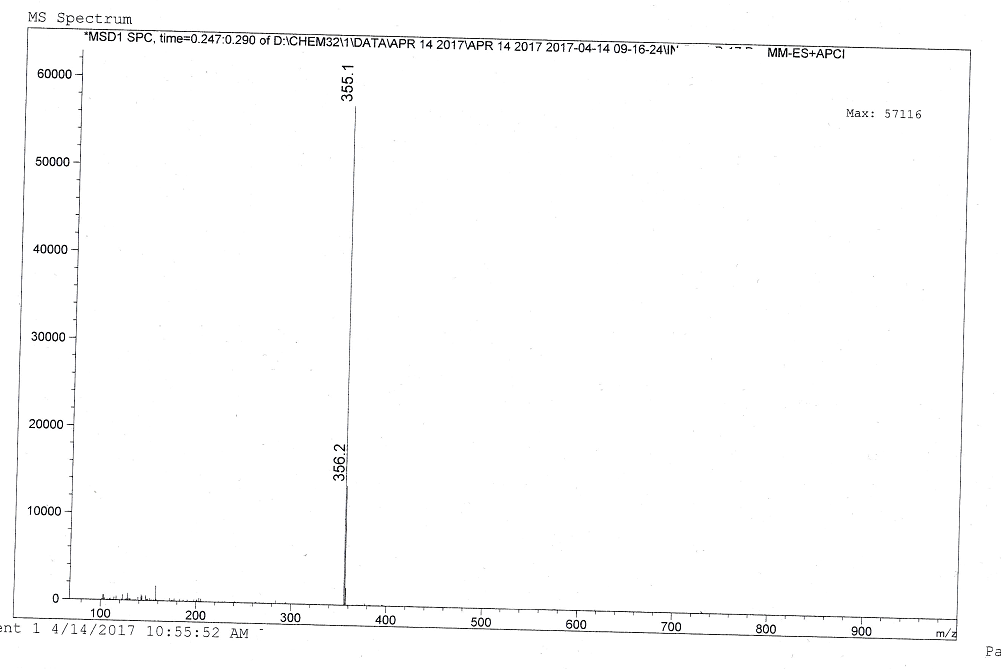
**

**Figure S56:** ESI Mass spectrum of compound **10a**


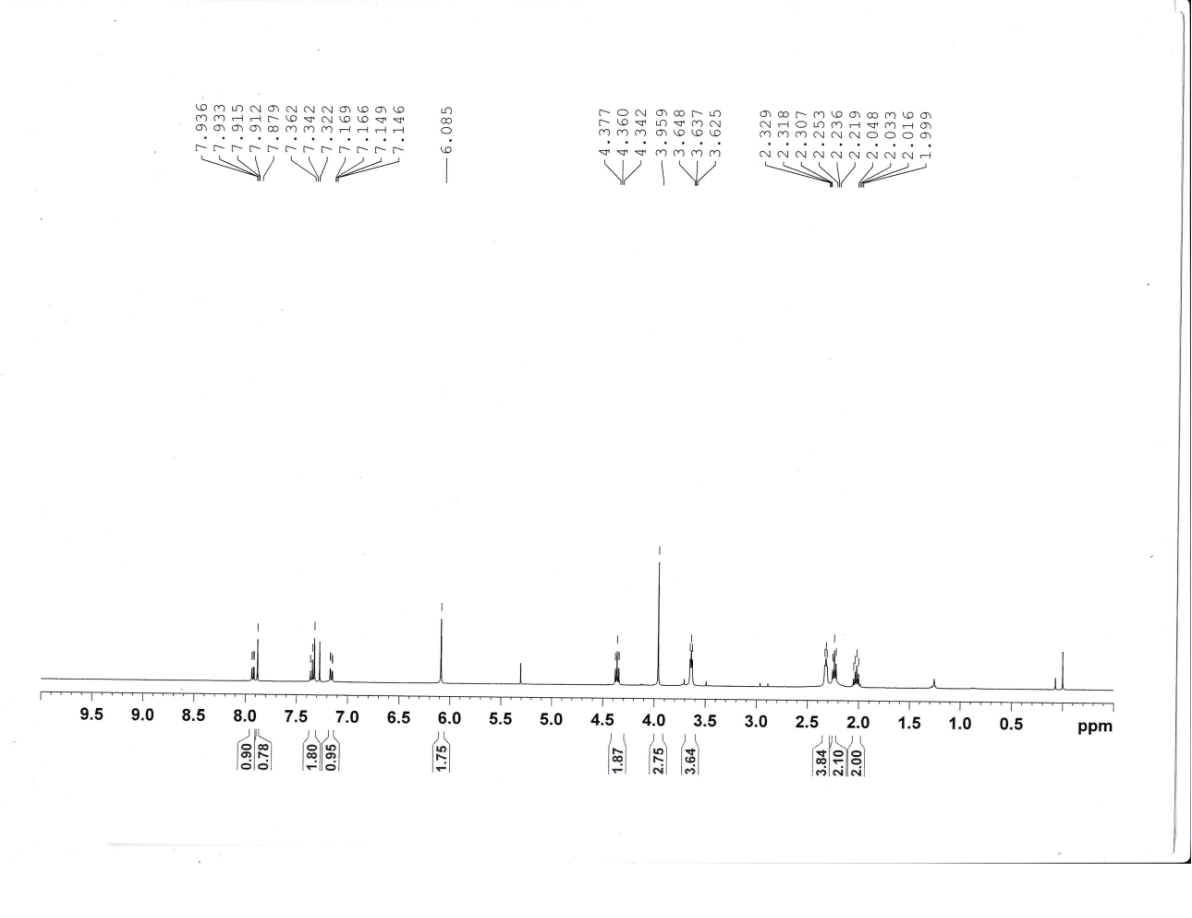


**Figure S57:** 1H-NMR spectrum of compound **10b**


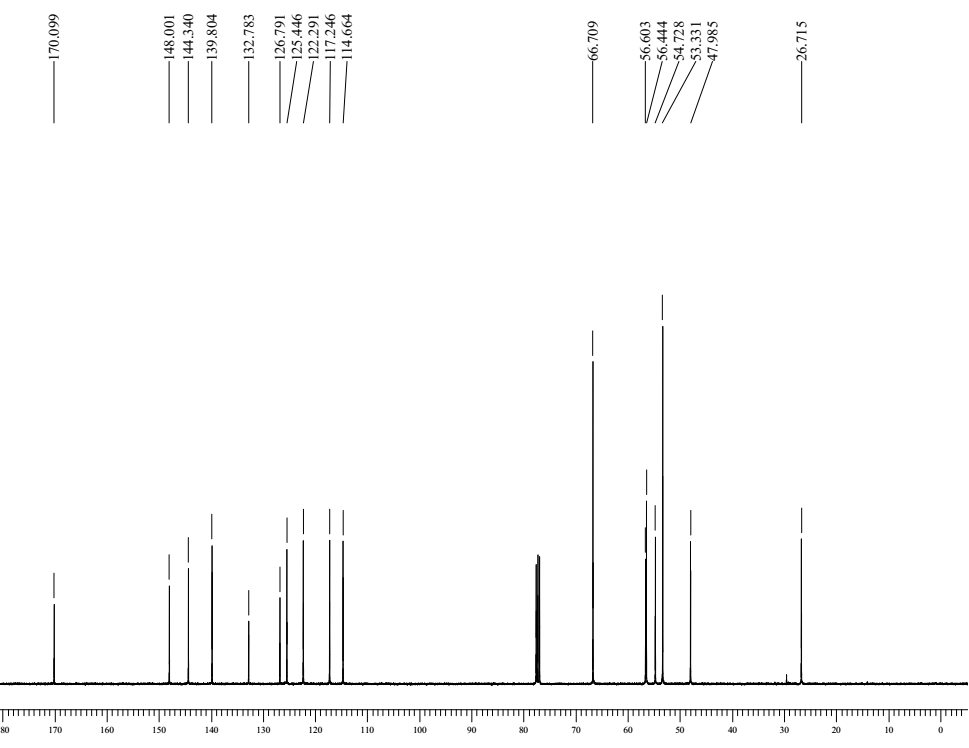


**Figure S58:** 13C- NMR spectrum of compound **10b**

**
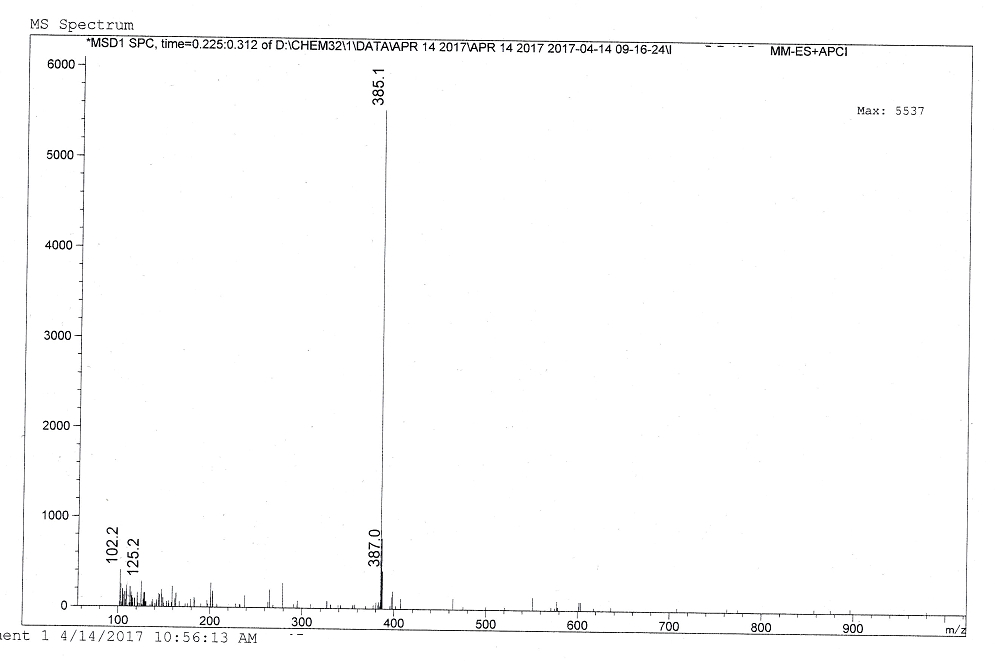
**

**Figure S59:** ESI Mass spectrum of compound **10b**


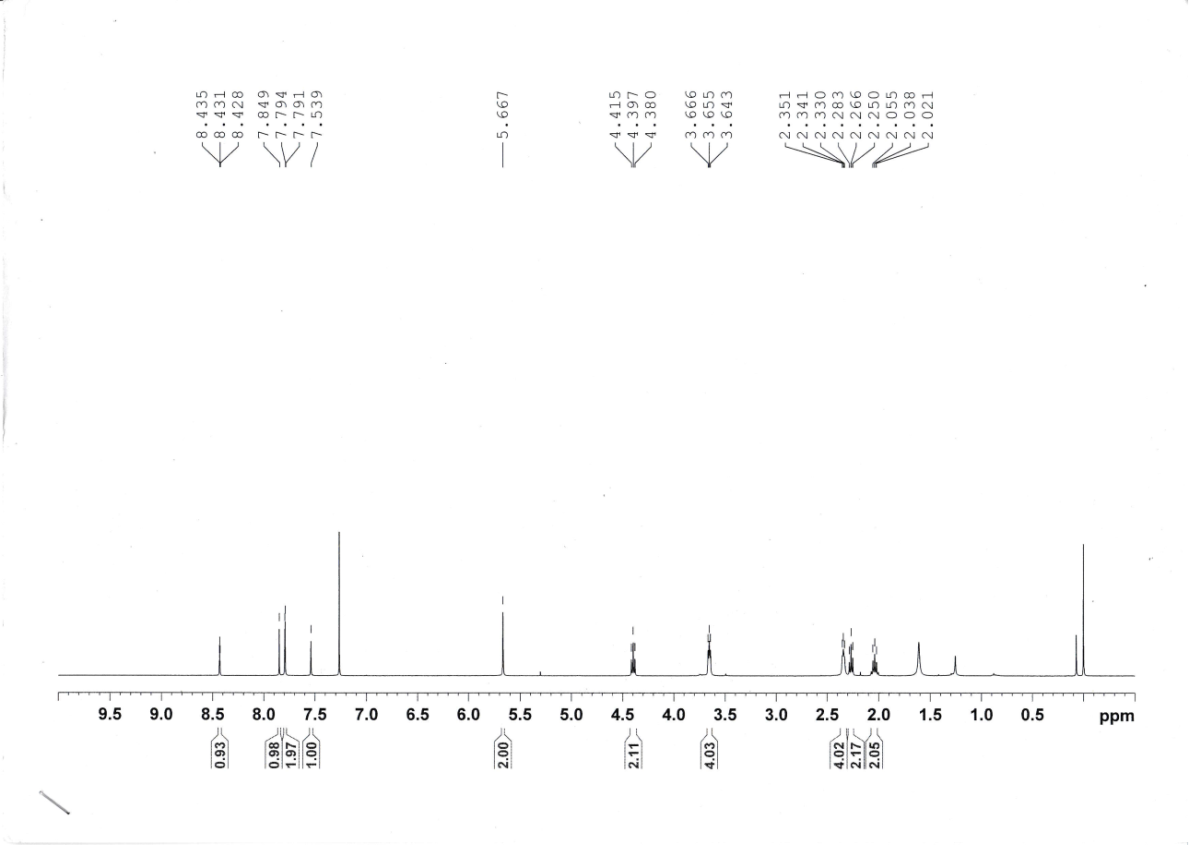


**Figure S60:** 1H-NMR spectrum of compound **10c**


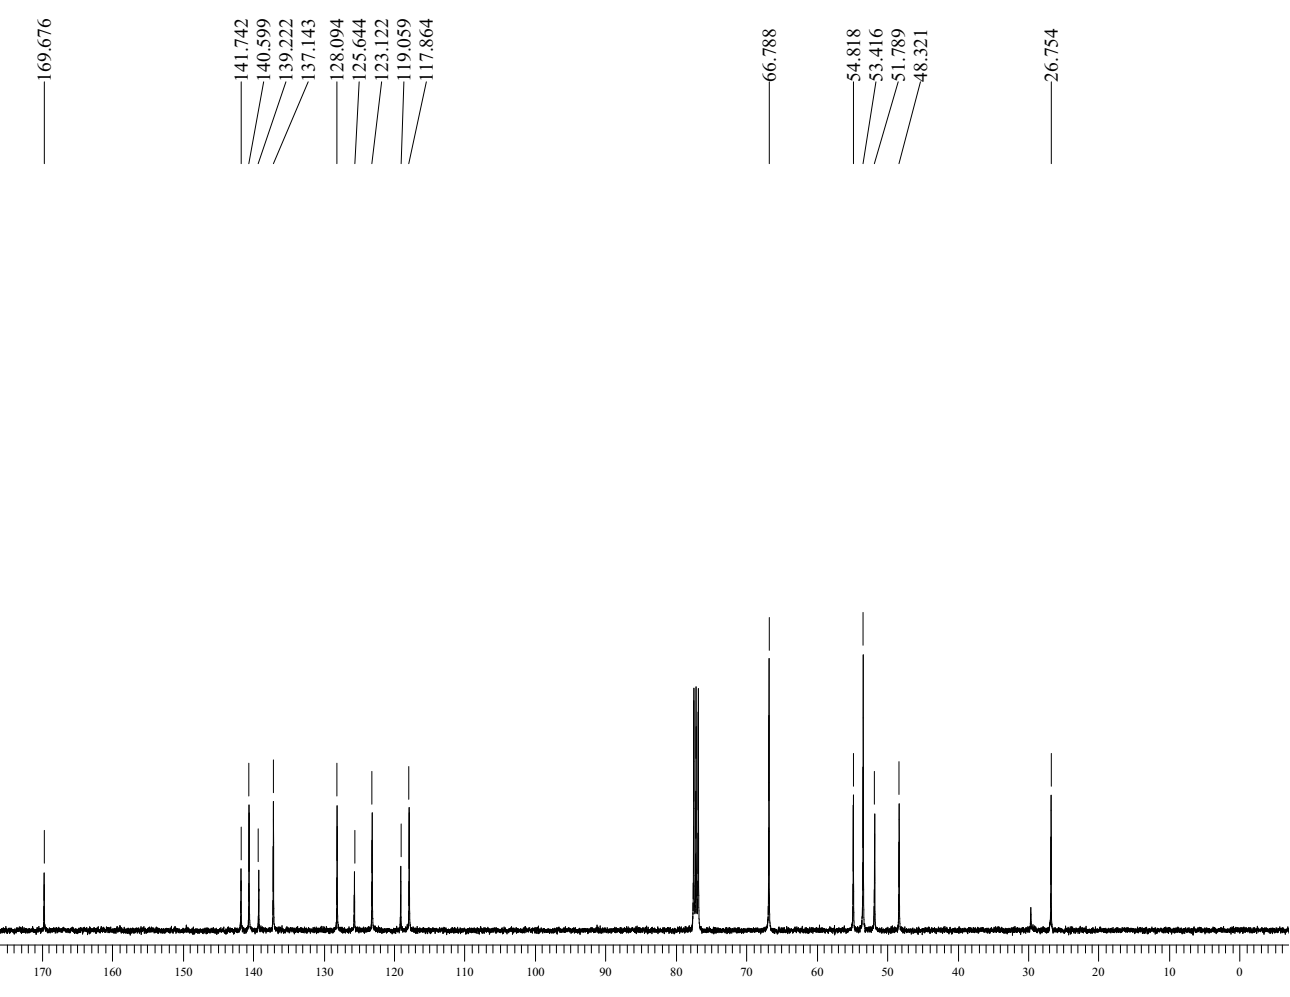


**Figure S61:** 13C- NMR spectrum of compound **10c**

**
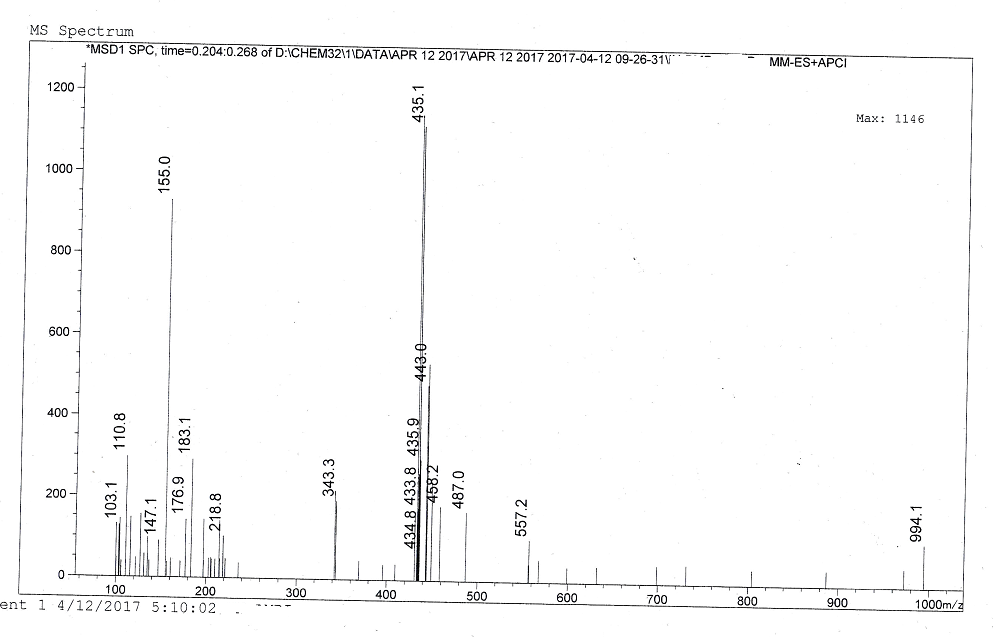
**

**Figure S62:** ESI Mass spectrum of compound **10c**


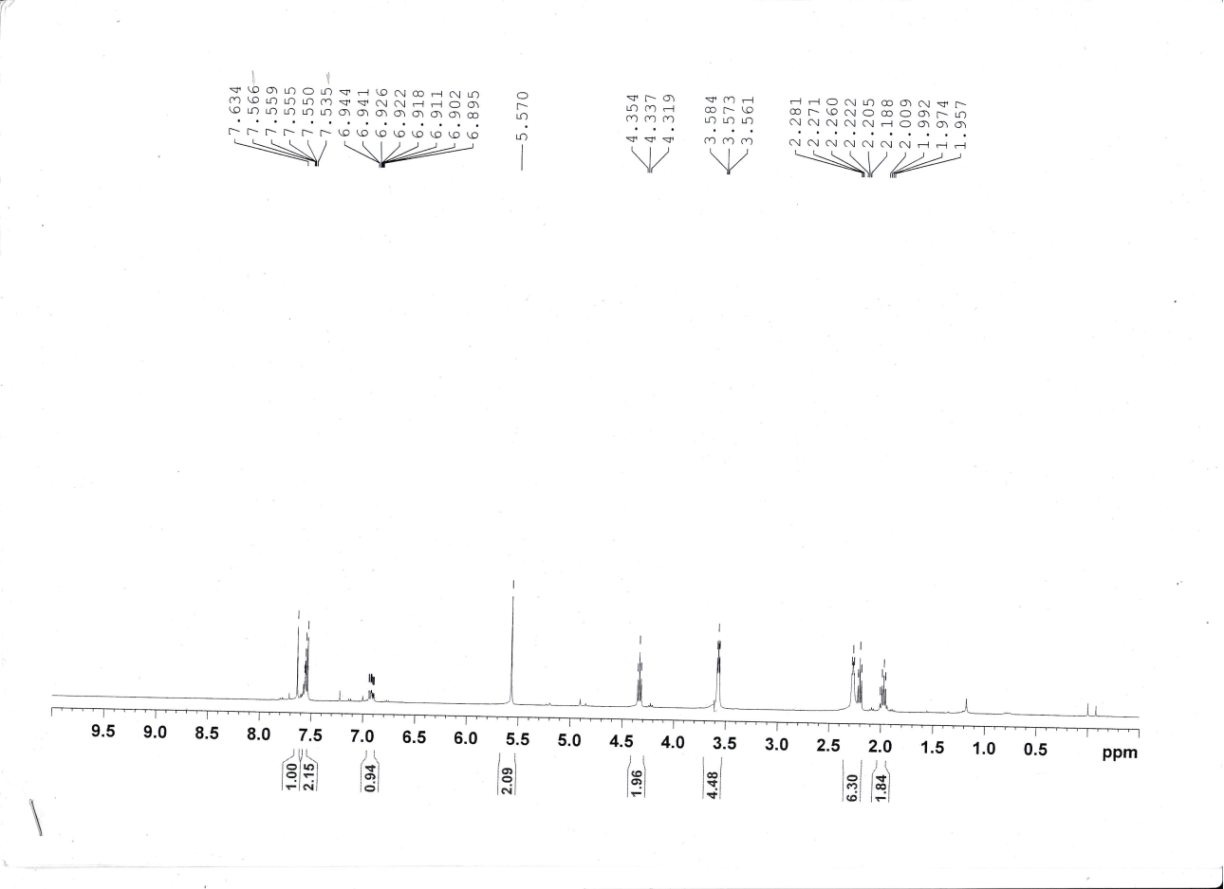


**Figure S63:** 1H-NMR spectrum of compound **10d**


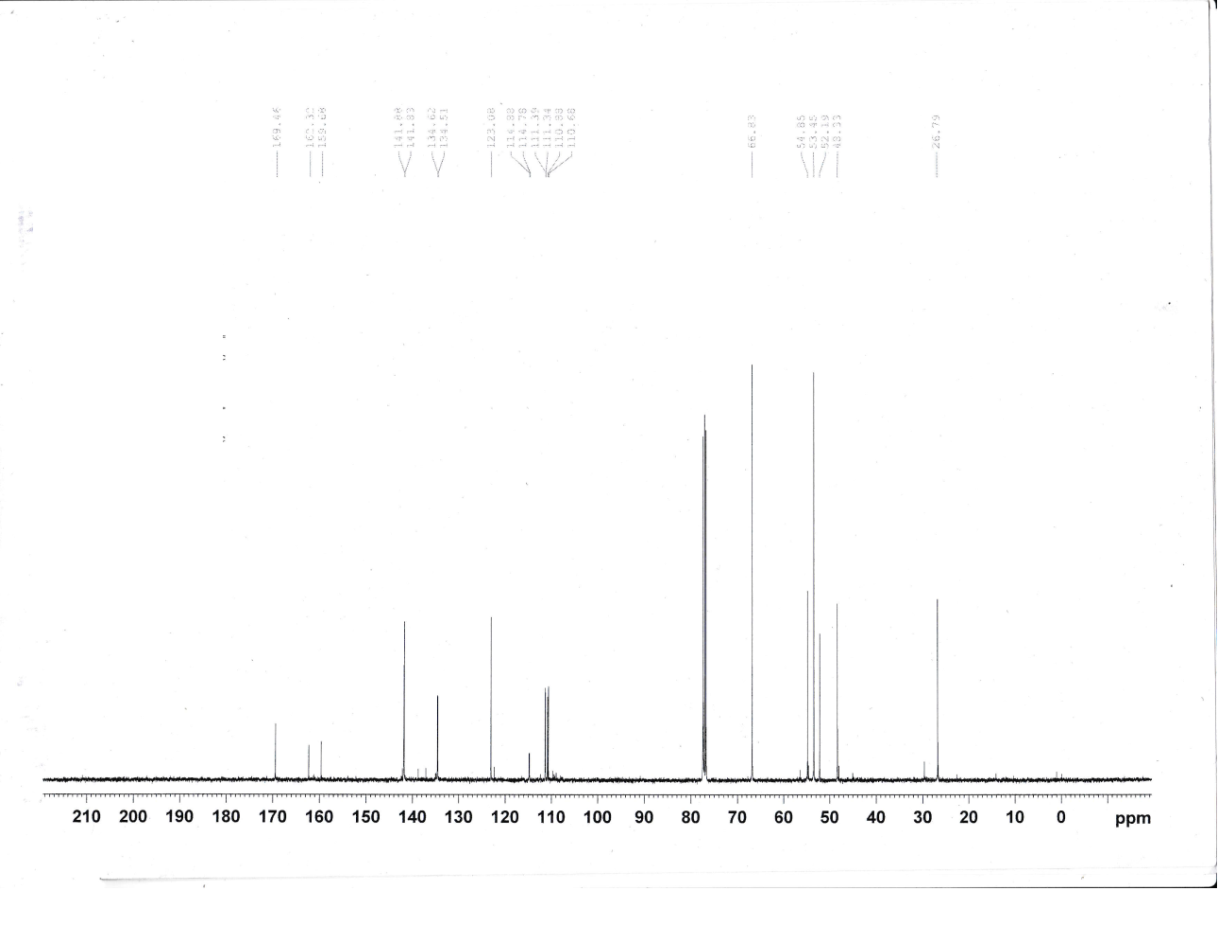


**Figure S64:** 13C- NMR spectrum of compound **10d**
